# Supplementary material for: One-pot three-component synthesis of 1,4,5-trisubstituted 5-iodo-1,2,3-triazoles from 1-copper(i) alkyne, azide and molecular iodine
Source: Royal Society of Chemistry journal article supplement (doi:10.1039/c4ra15980b), 2015-01-01

**Supporting Online Material for**

**One-pot three-component synthesis of 1,4,5-trisubstituted  
5-iodo-1,2,3-triazoles from 1-copper(I) alkyne, azide  
and molecular iodine**

Jianlan Zhang, Wenwen Chen, Bo Wang, Zhouxing Zhao, Xinyan Wang\*, Yuefei Hu\*

*Department of Chemistry, Tsinghua University, Beijing 100084, P. R. China*

[wangxinyan@mail.tsinghua.edu.cn](mailto:wangxinyan@mail.tsinghua.edu.cn) and [yfh@mail.tsinghua.edu.cn](mailto:yfh@mail.tsinghua.edu.cn)

Copper(I) alkynes **6a-6k** were prepared by reported procedure in literature.<sup>15,16d,17a</sup>

**Prepared copper(I) alkynes 6a-6k:**

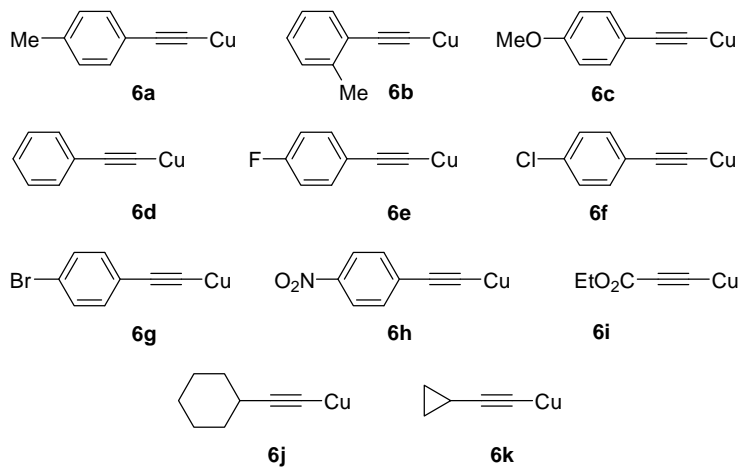

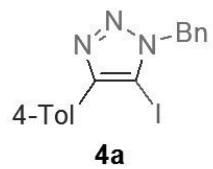

<sup>1</sup>H NMR (CDCl<sub>3</sub>, 400 MHz)

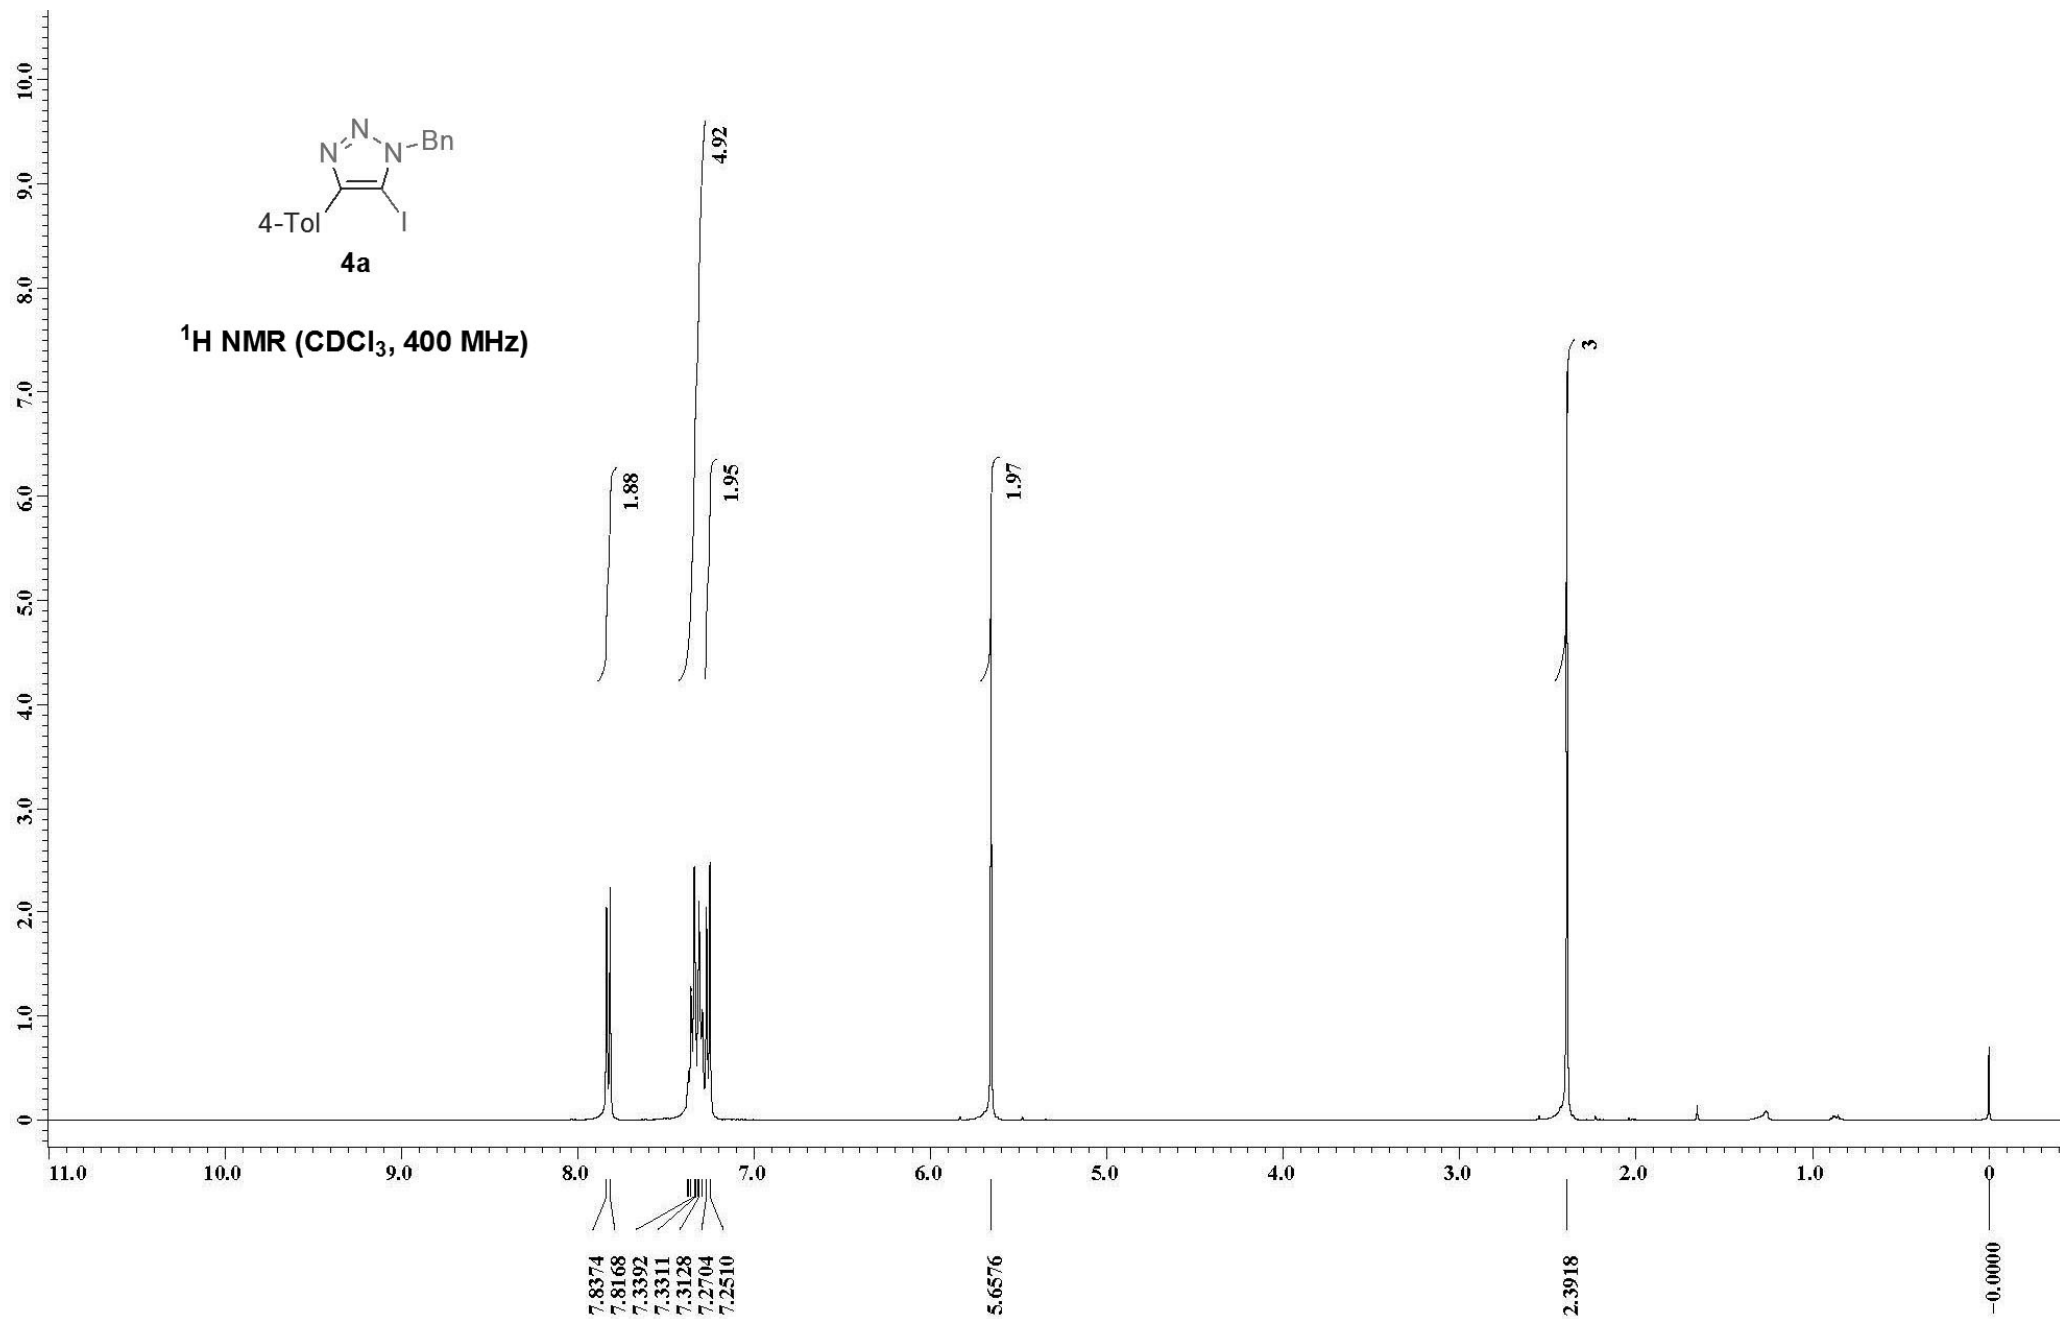

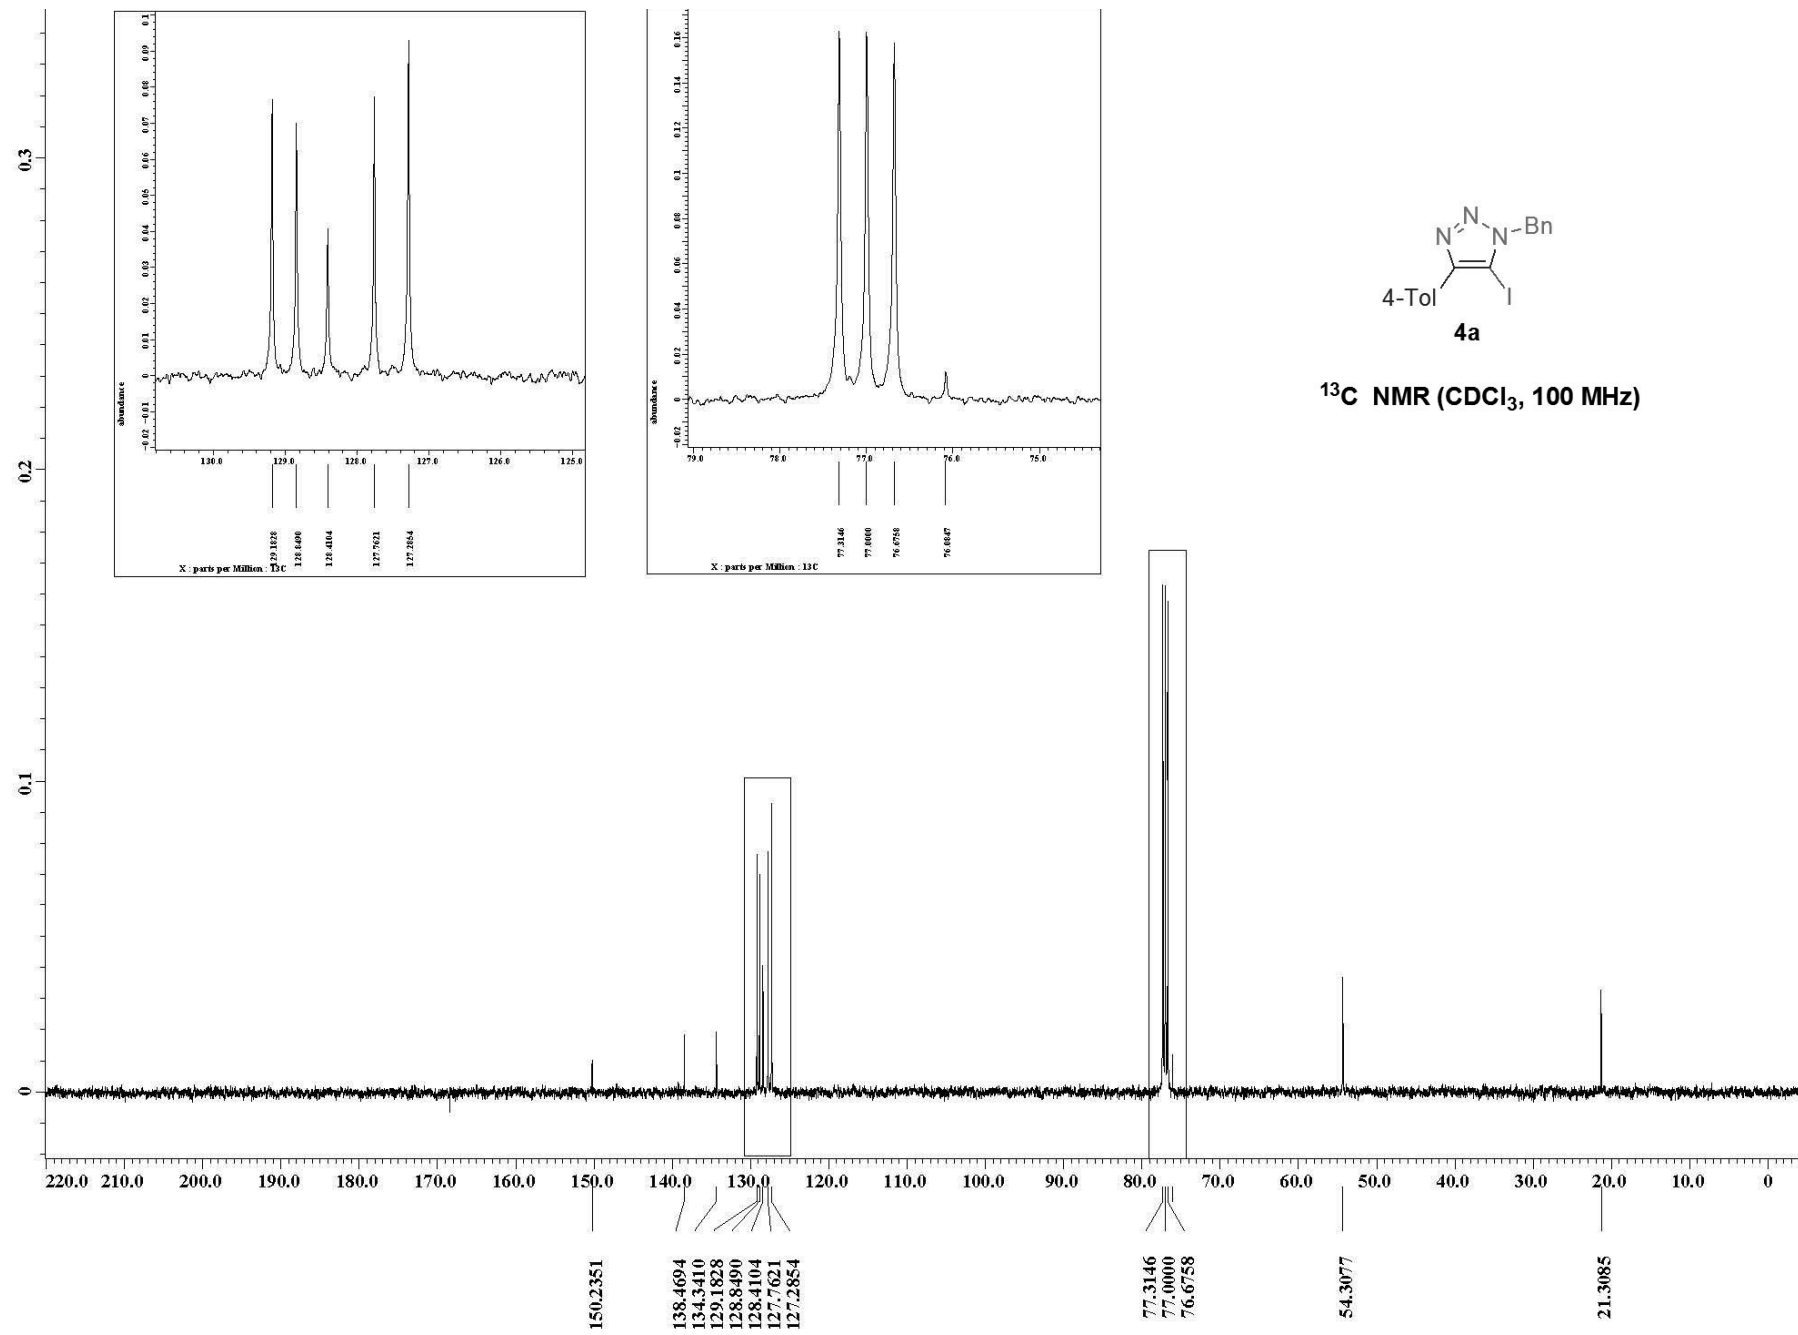

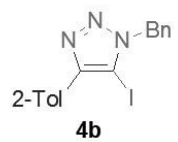

<sup>1</sup>H NMR (CDCl<sub>3</sub>, 400 MHz)

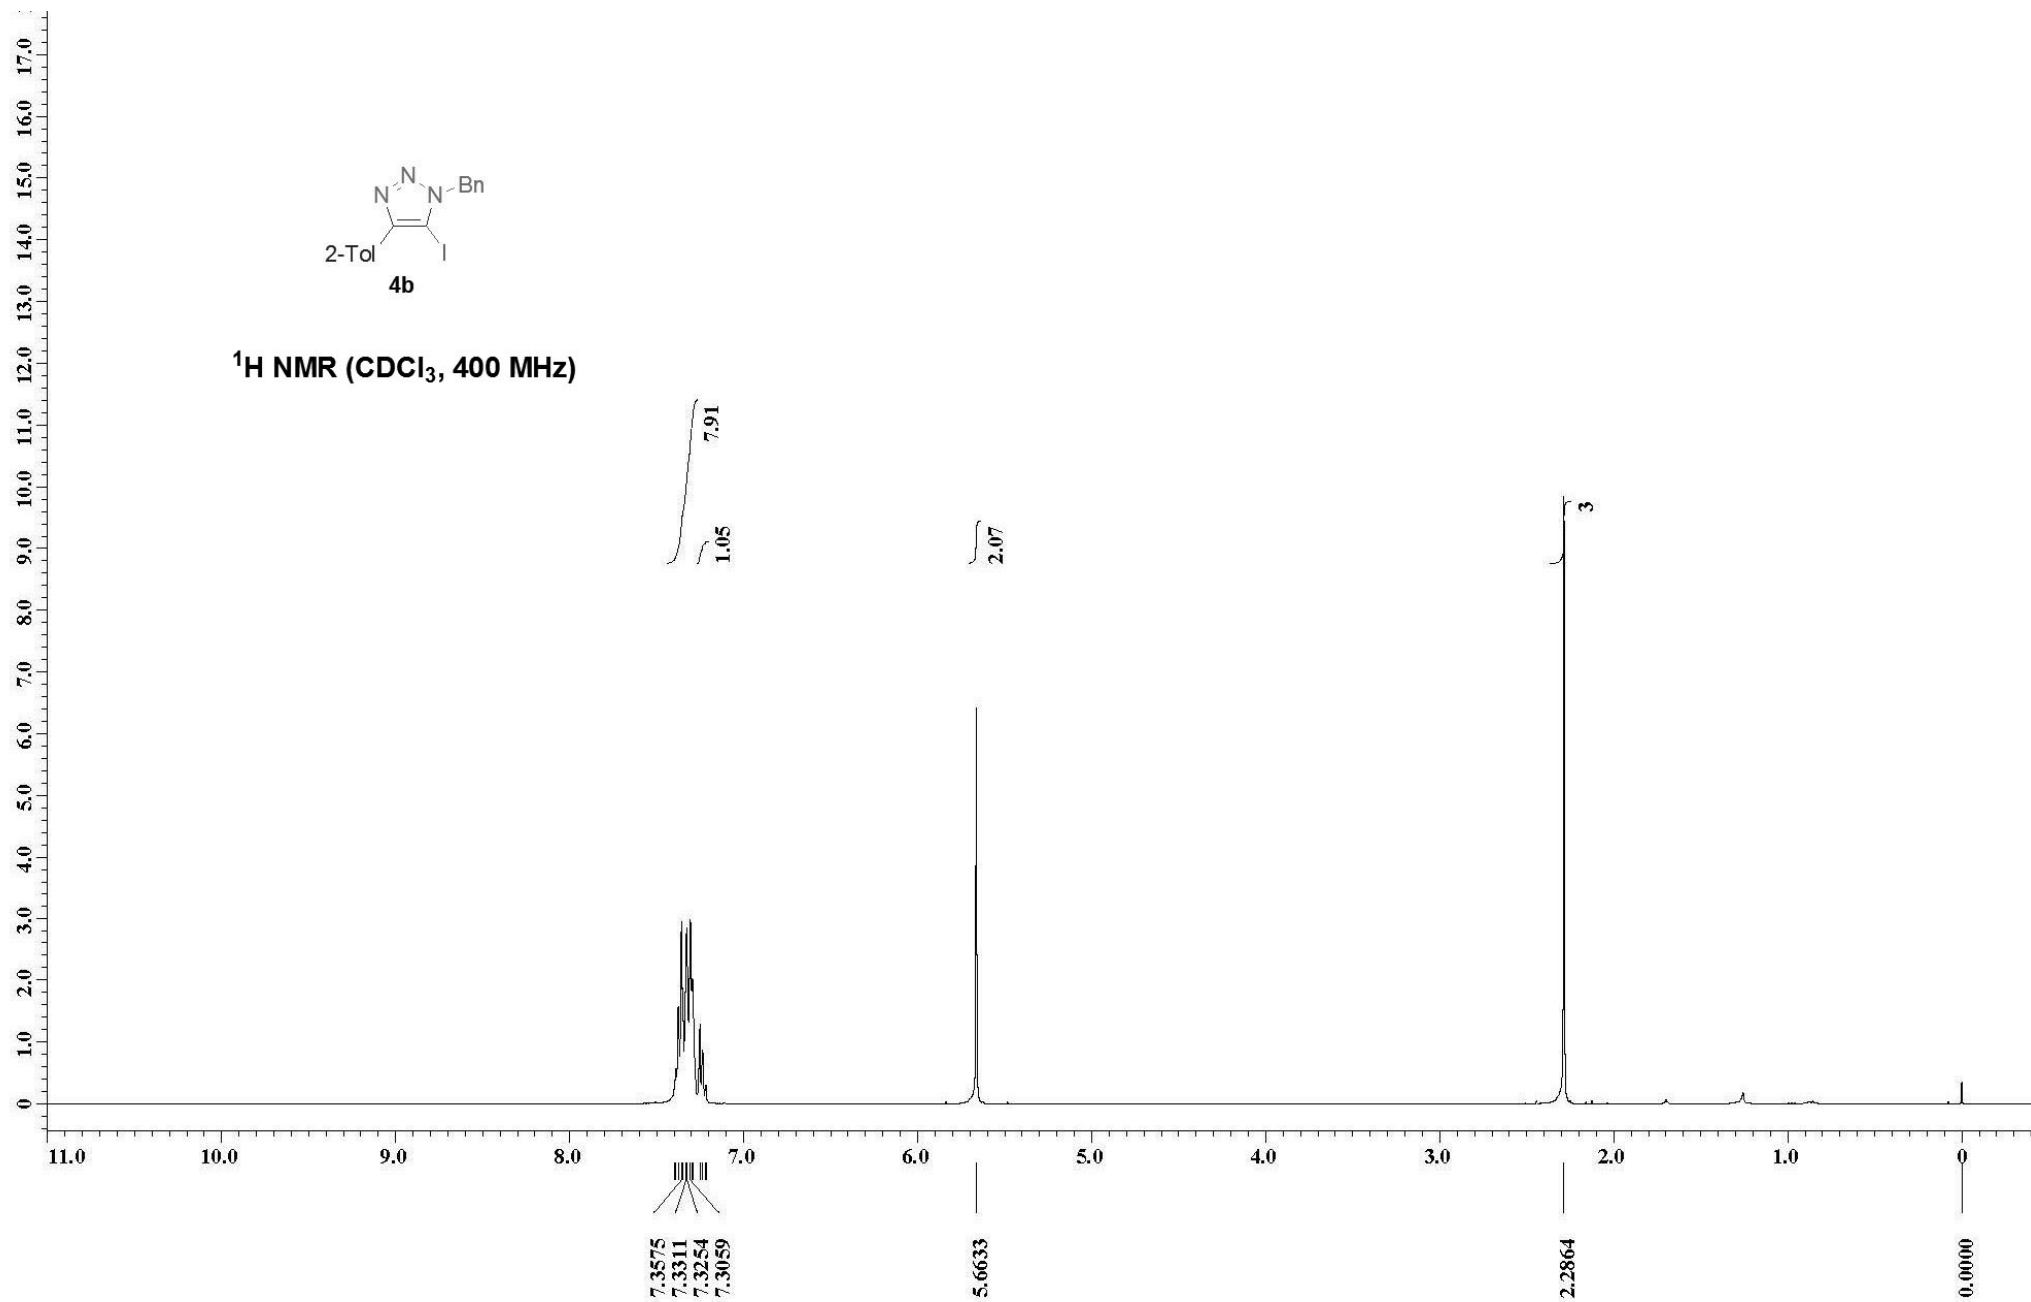

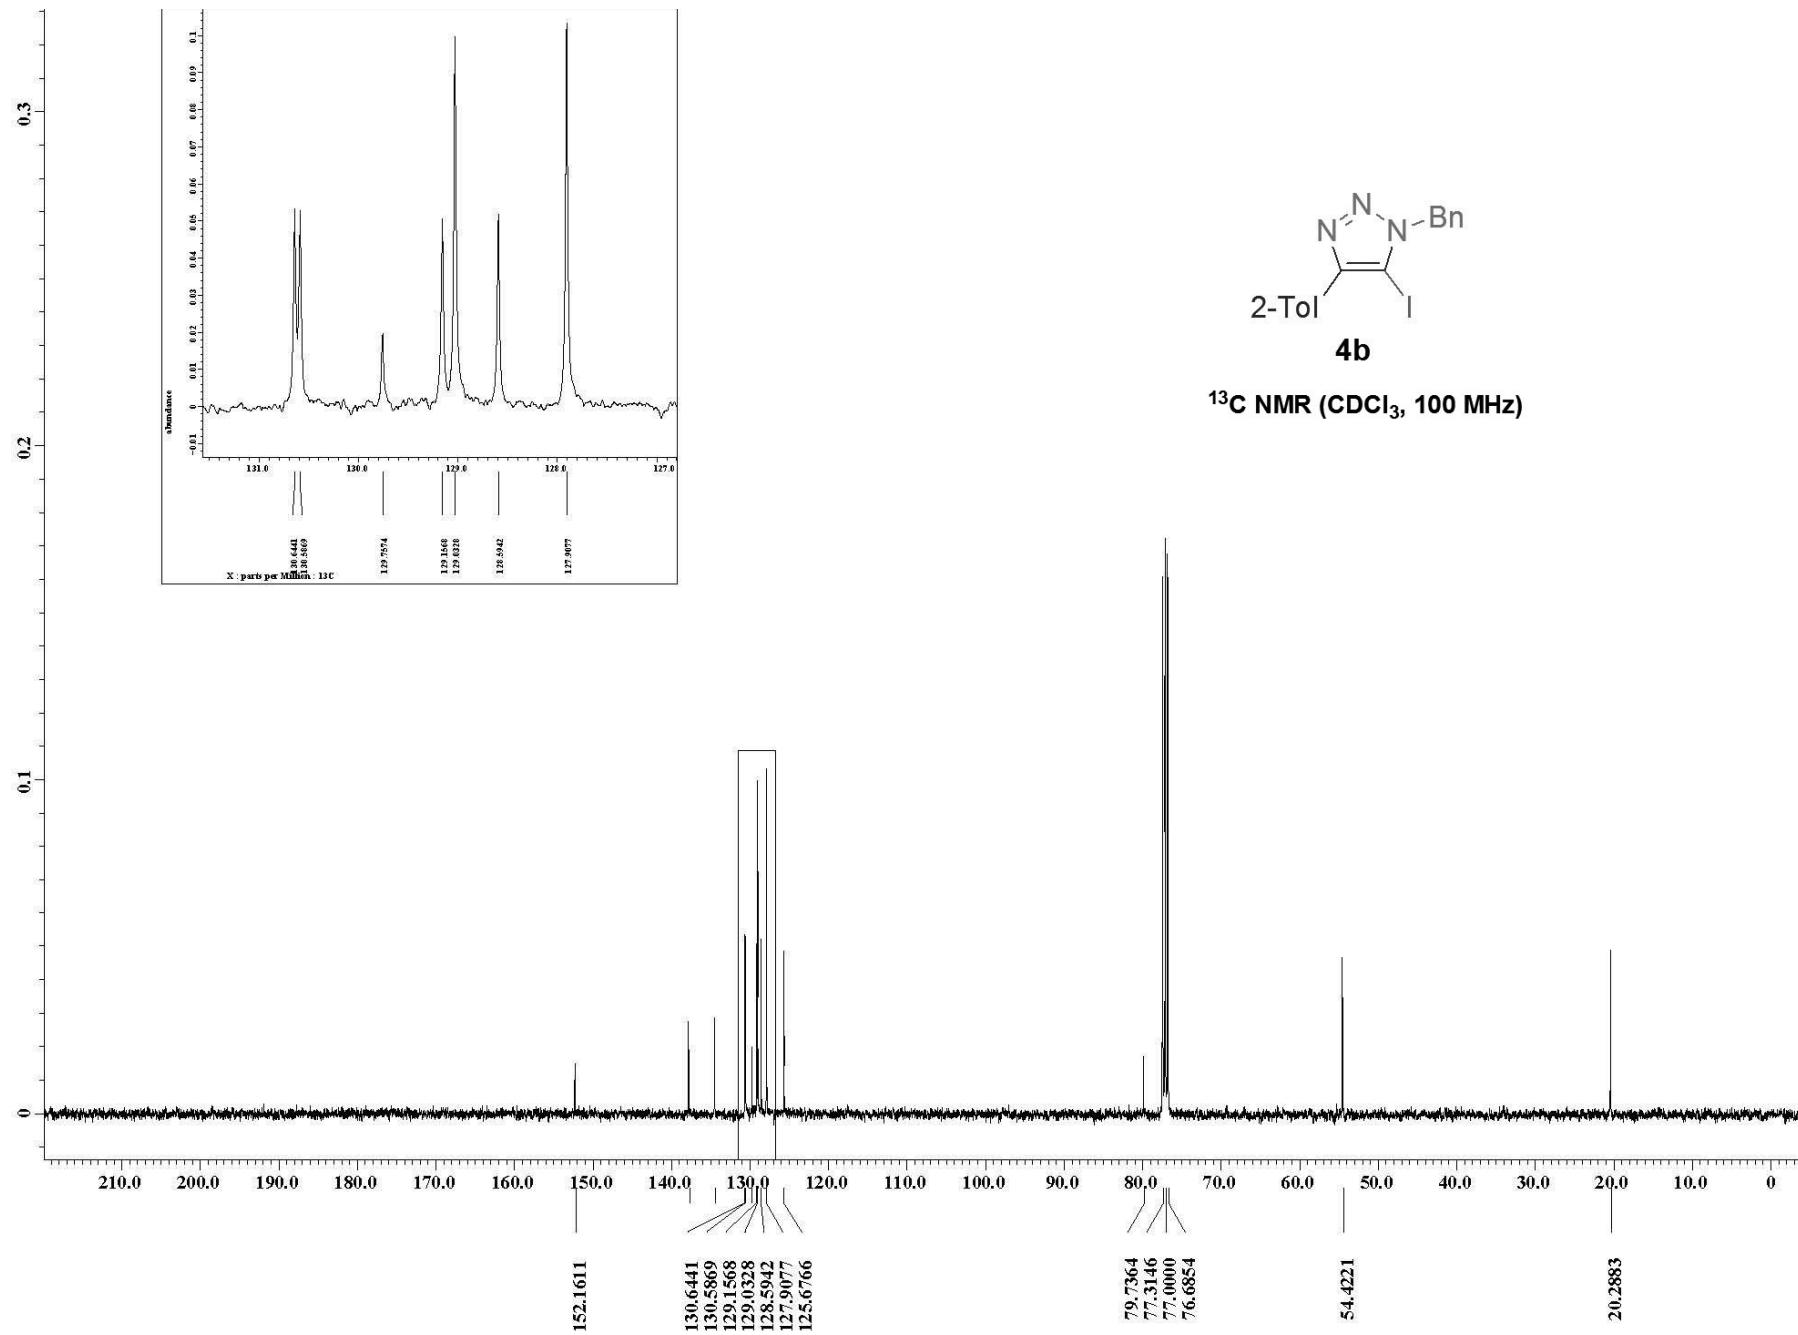

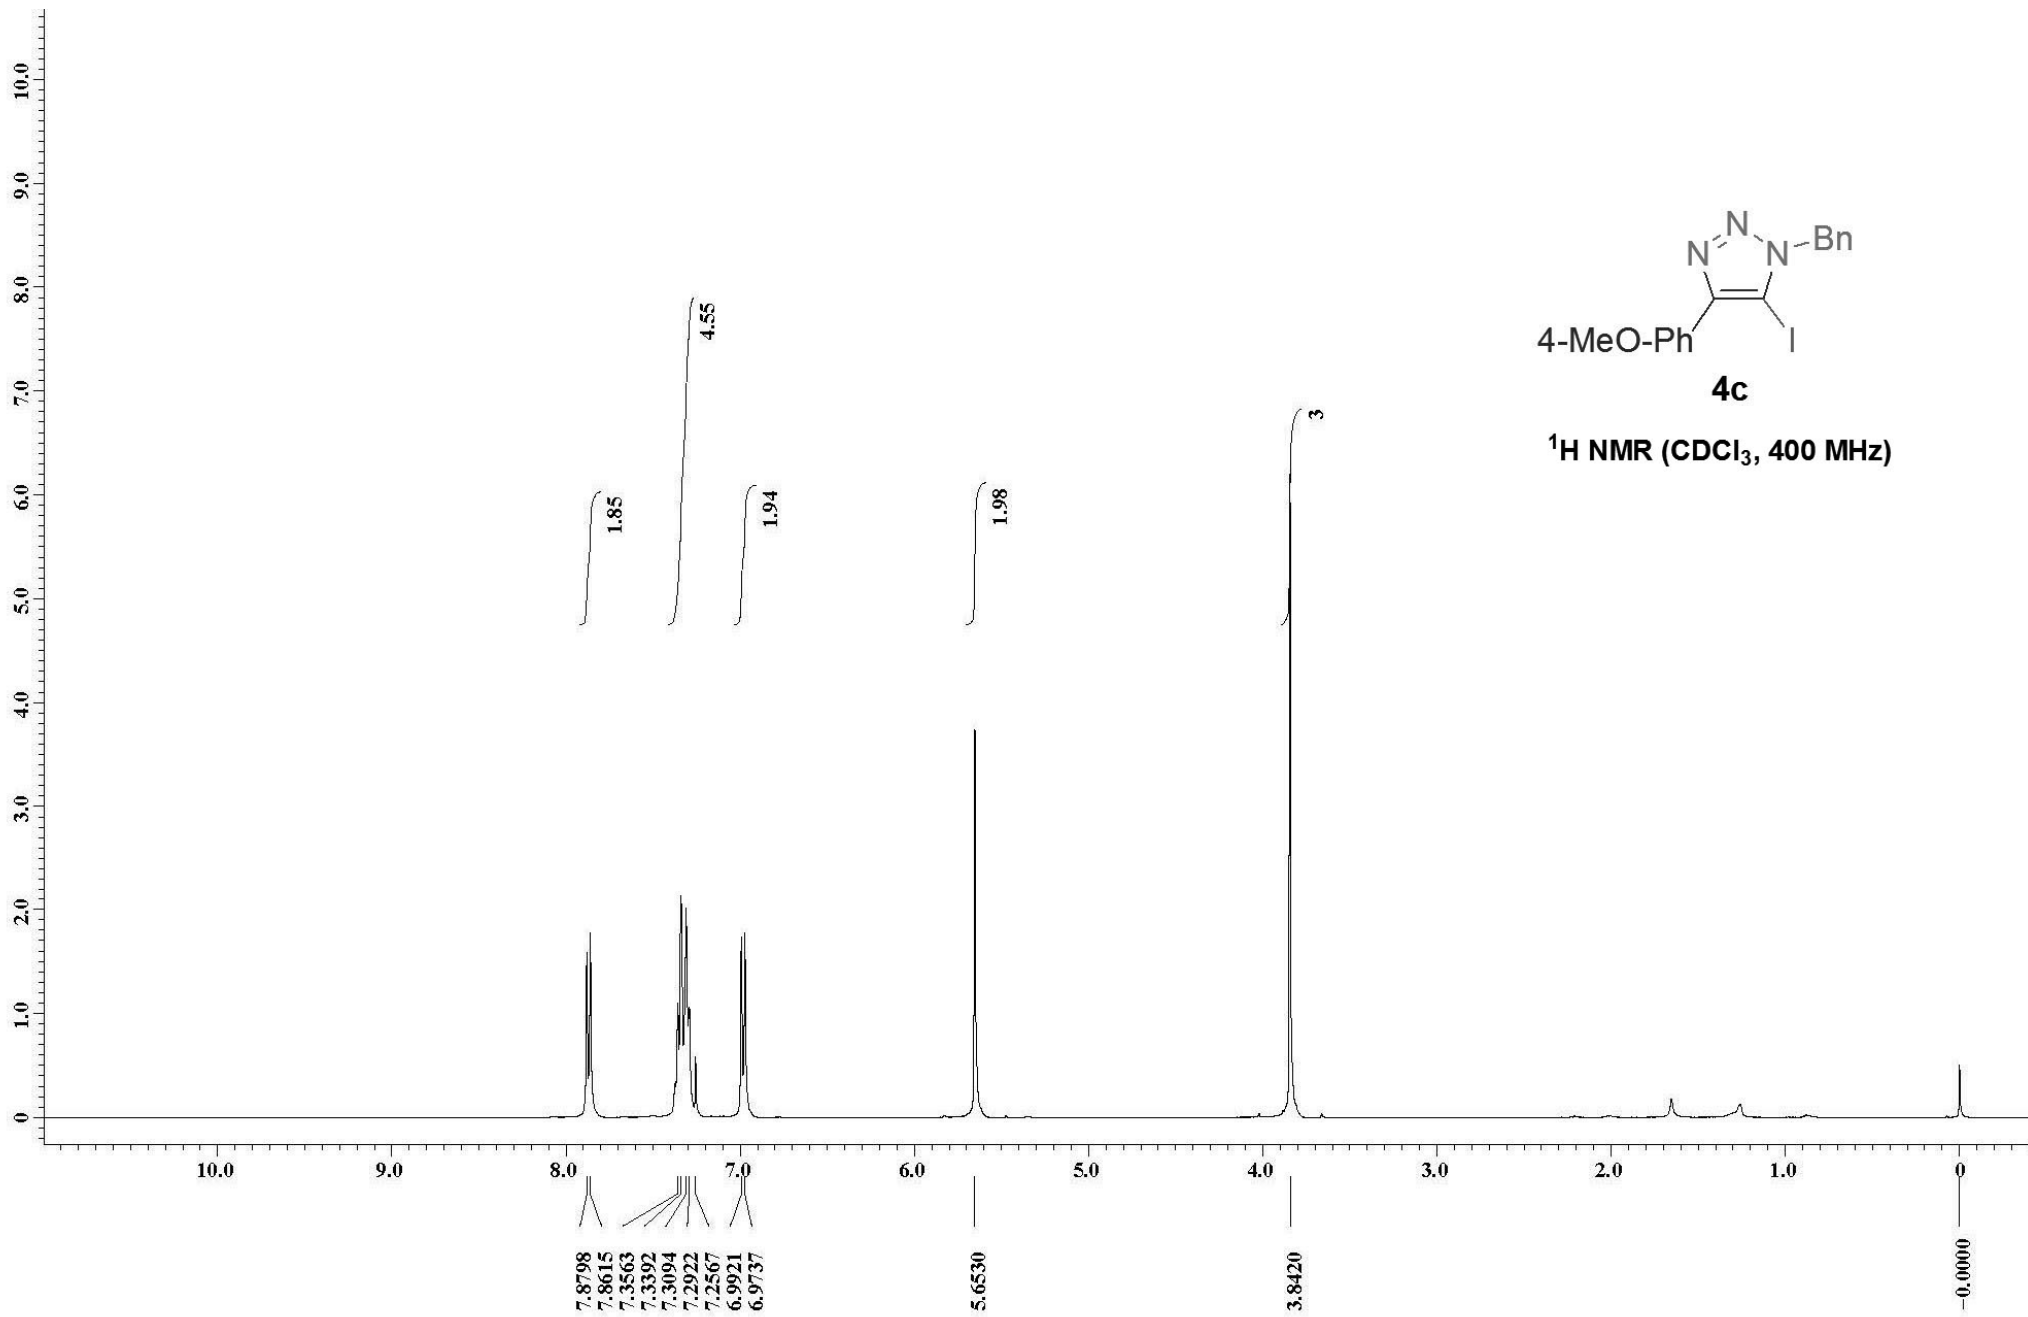

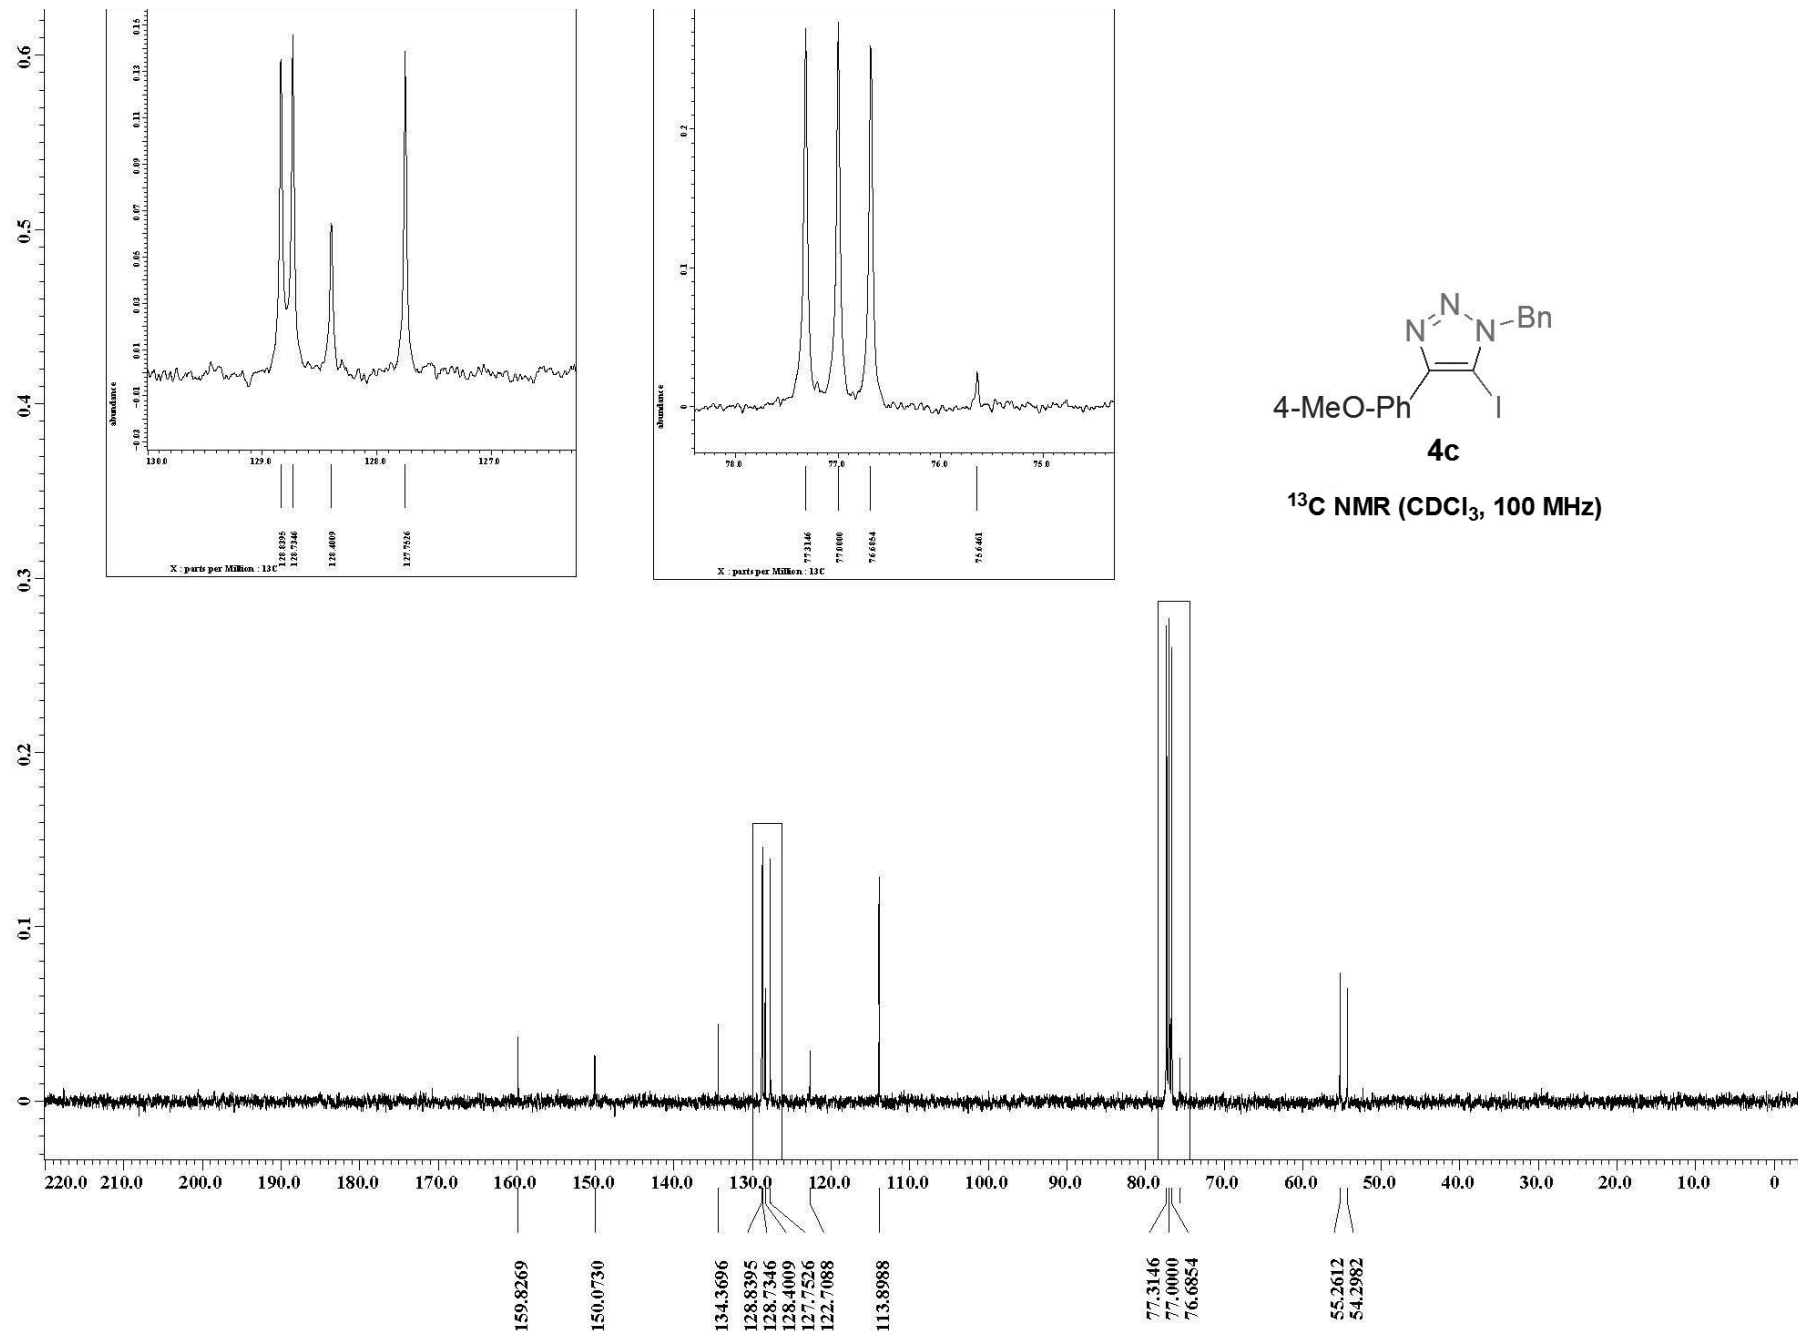



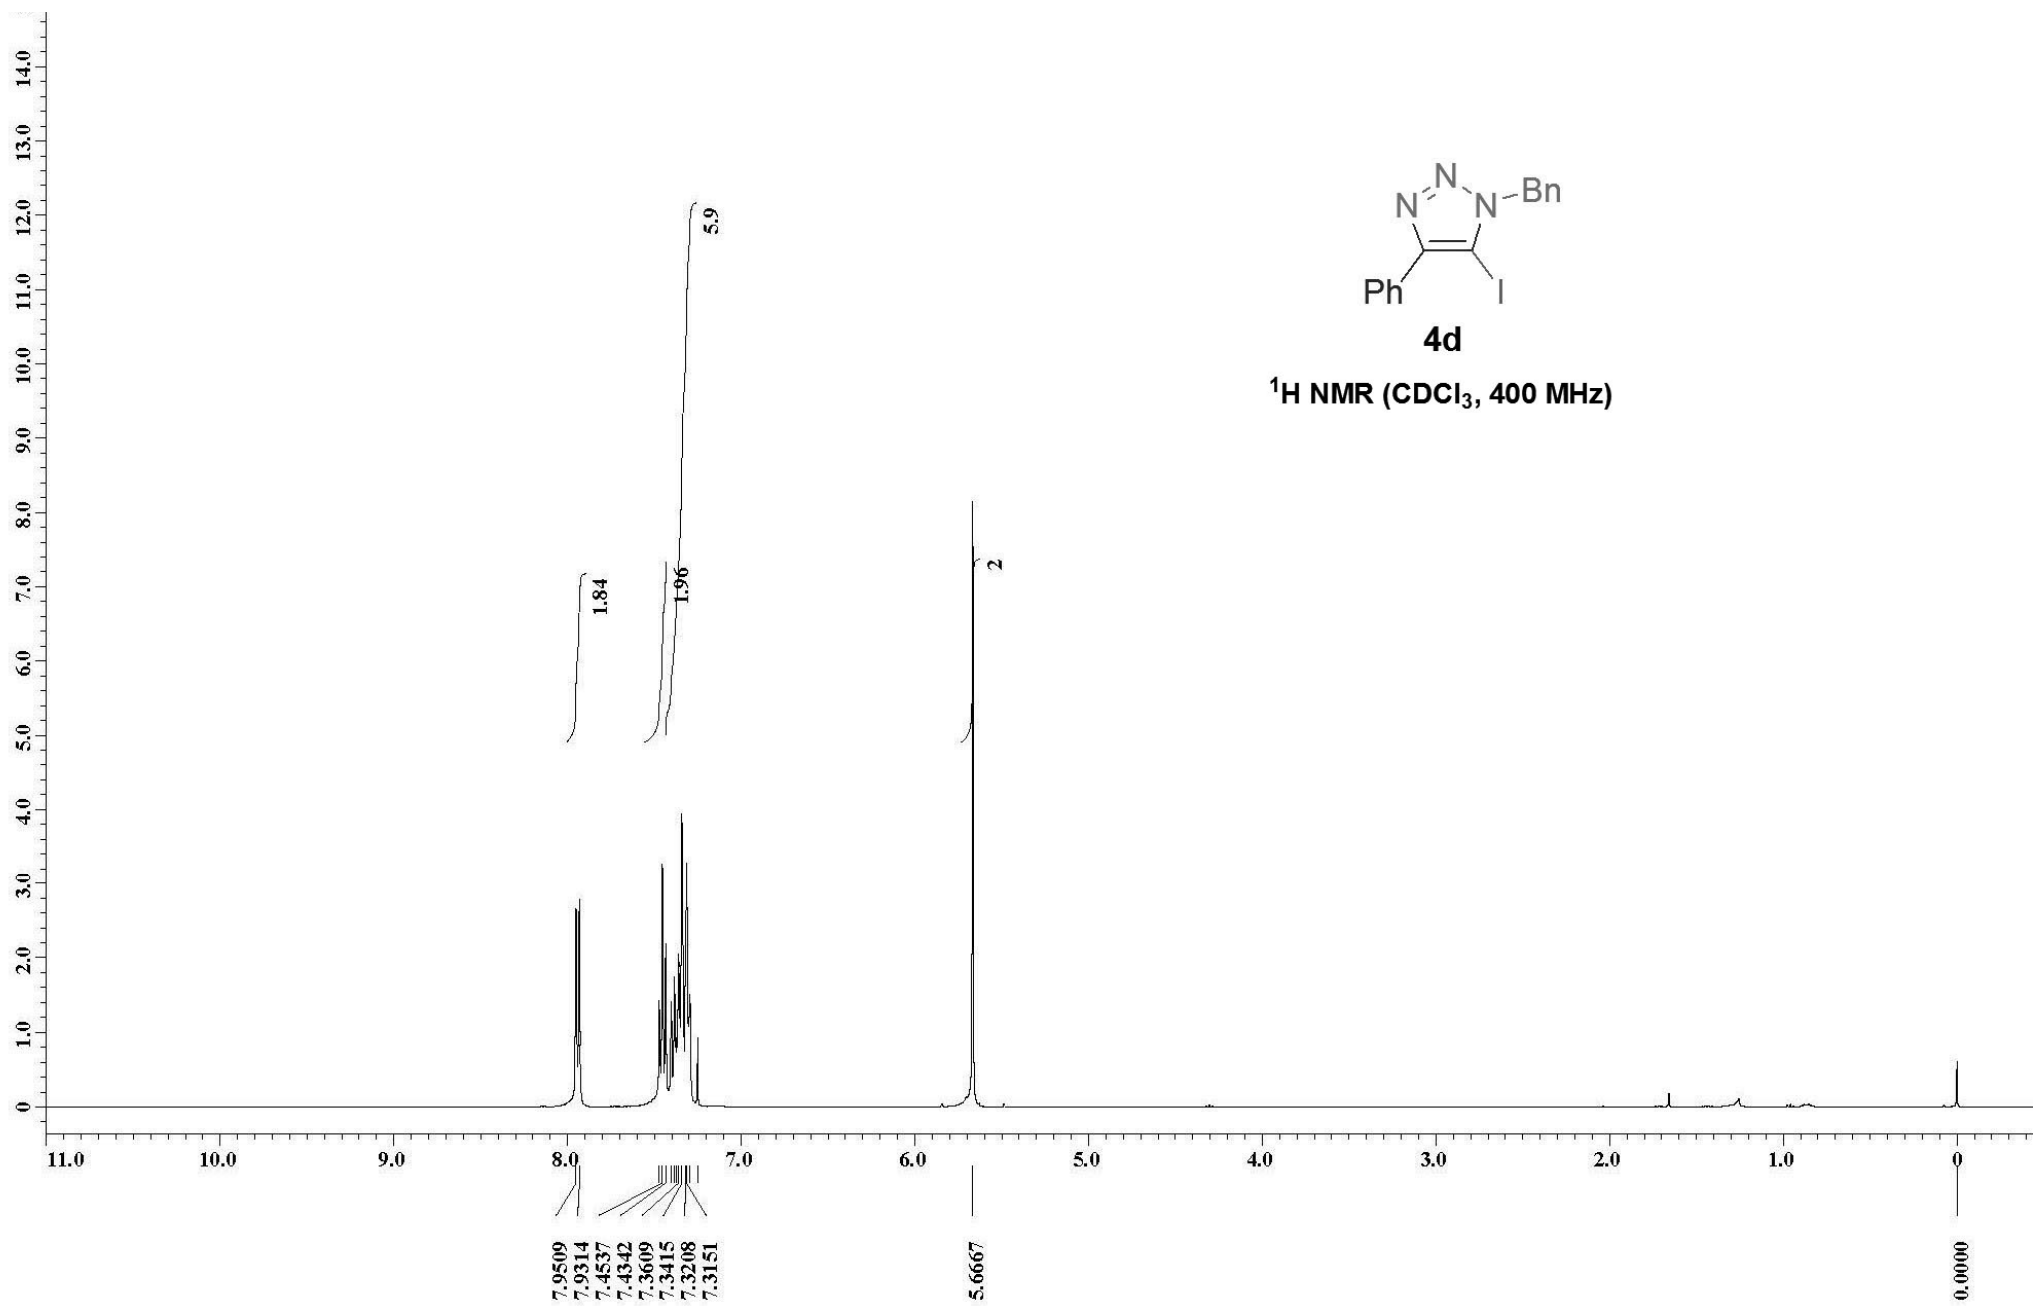

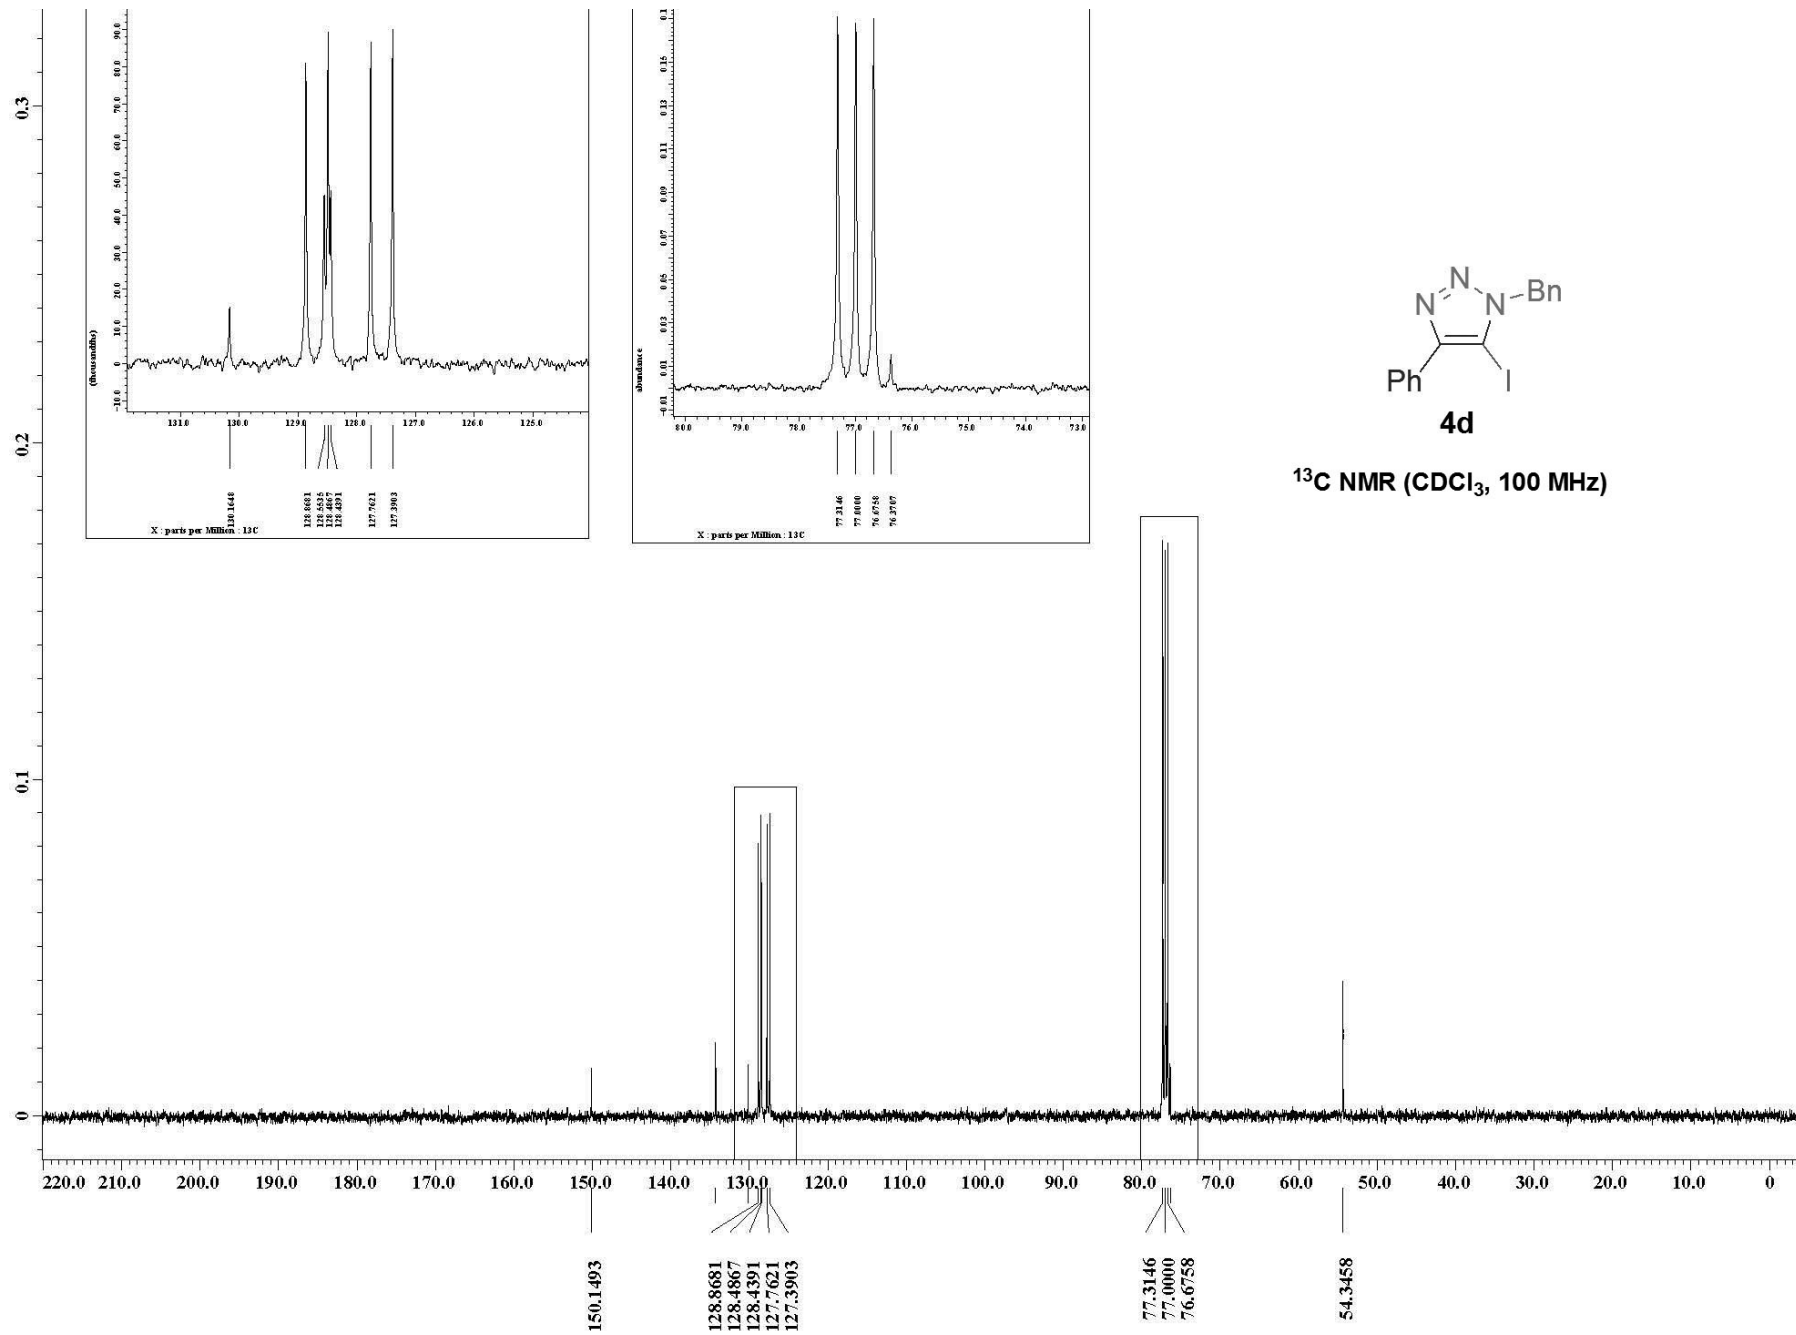

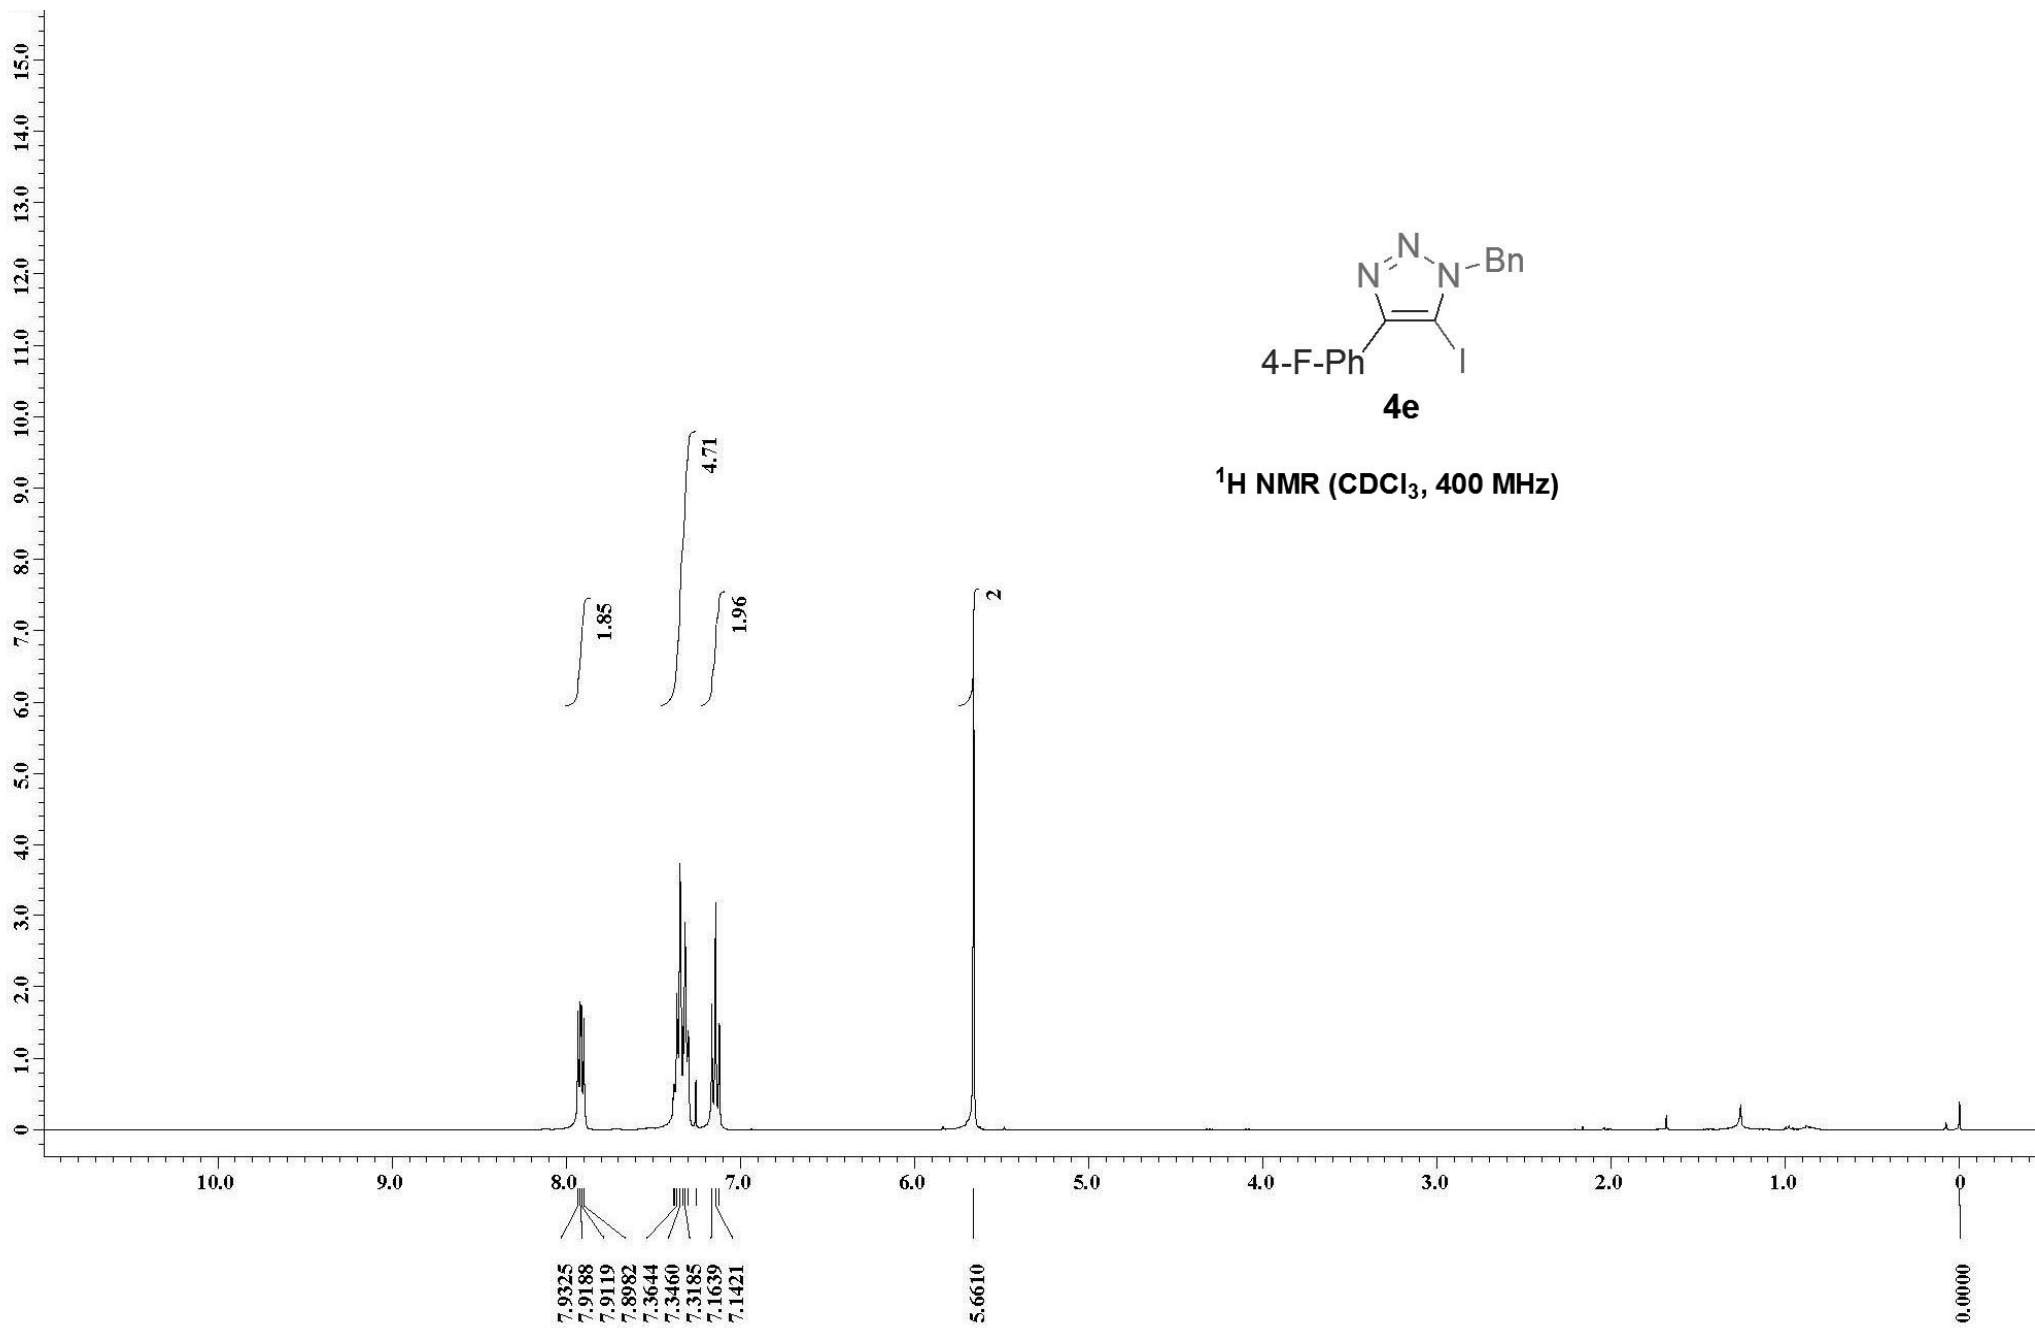

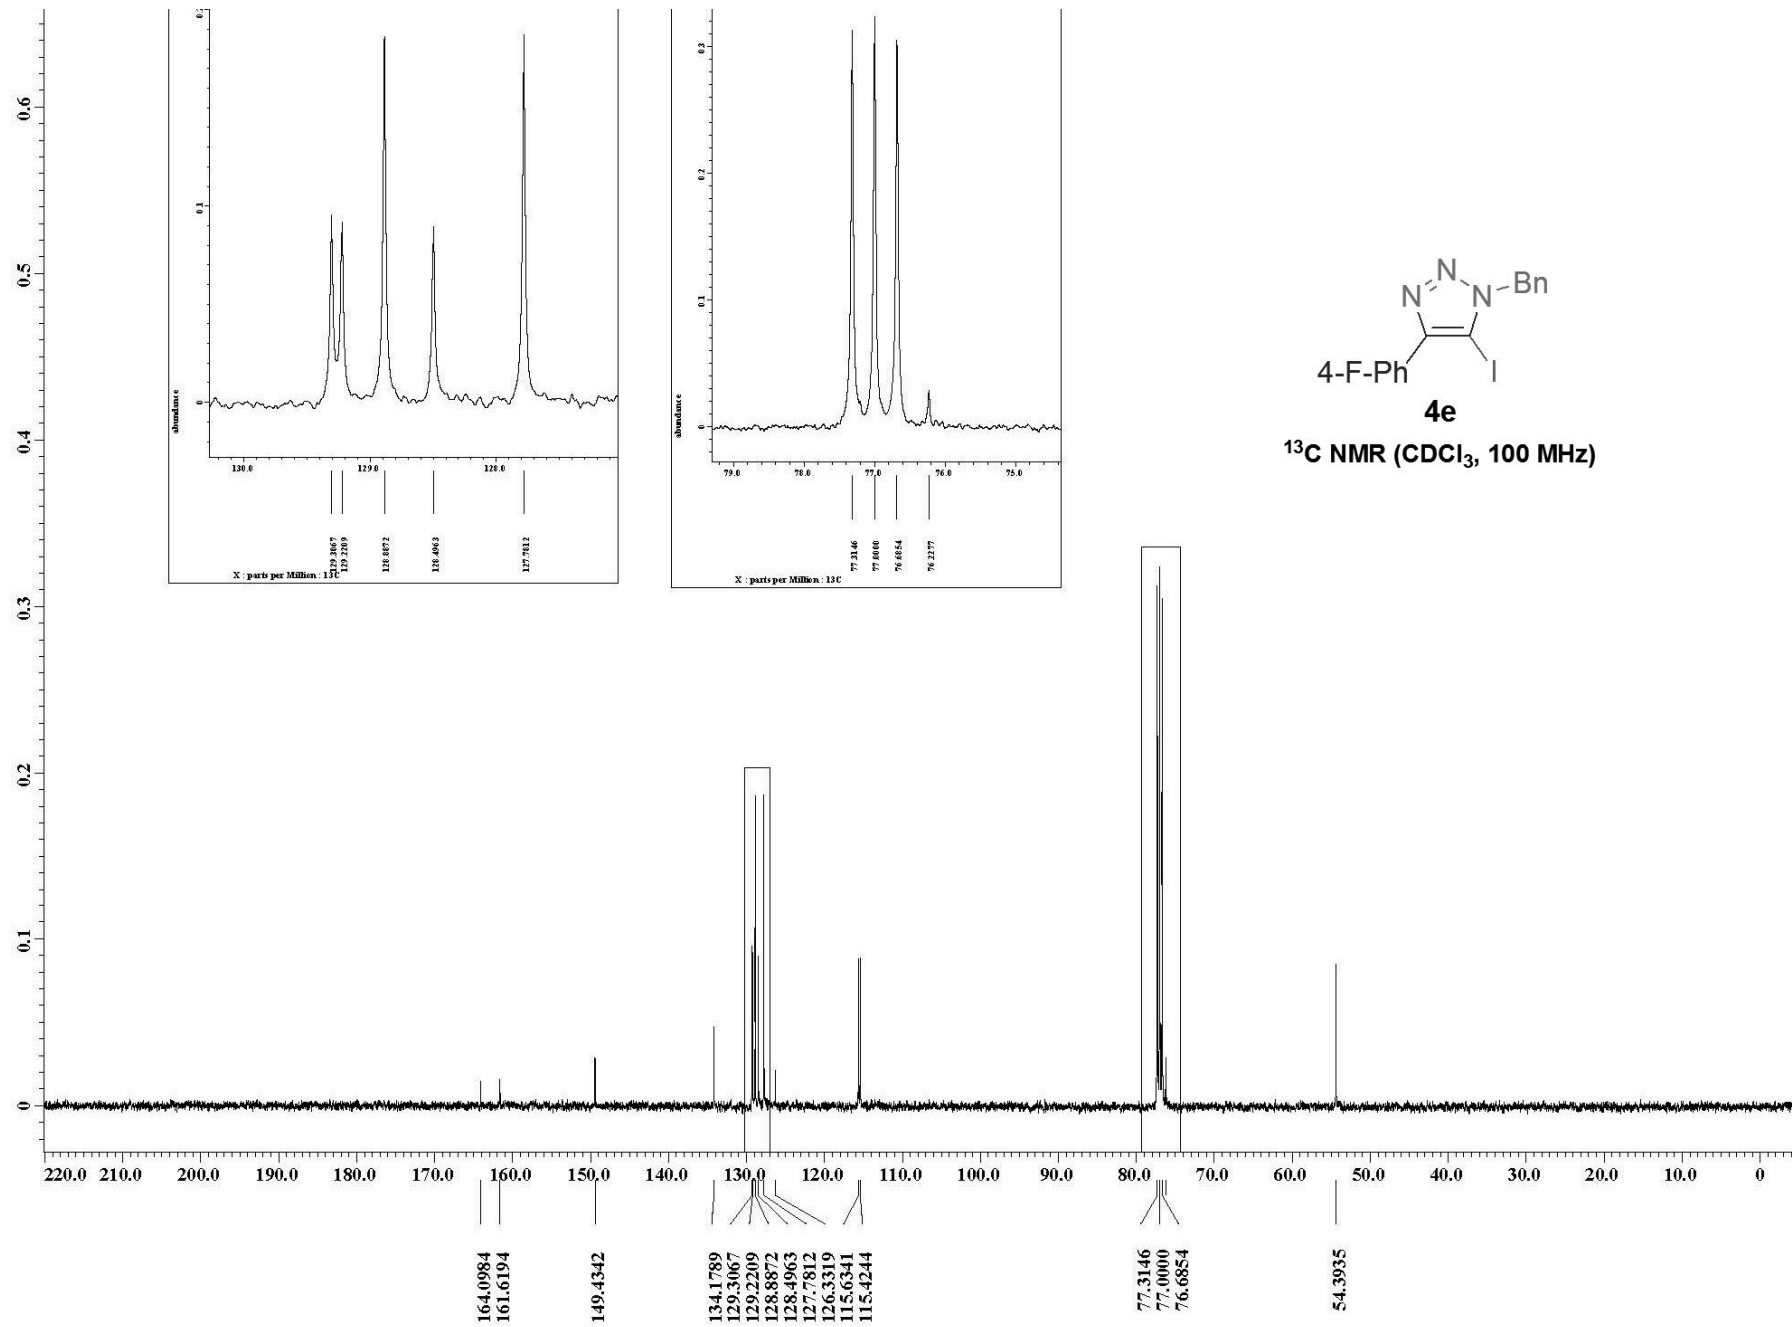

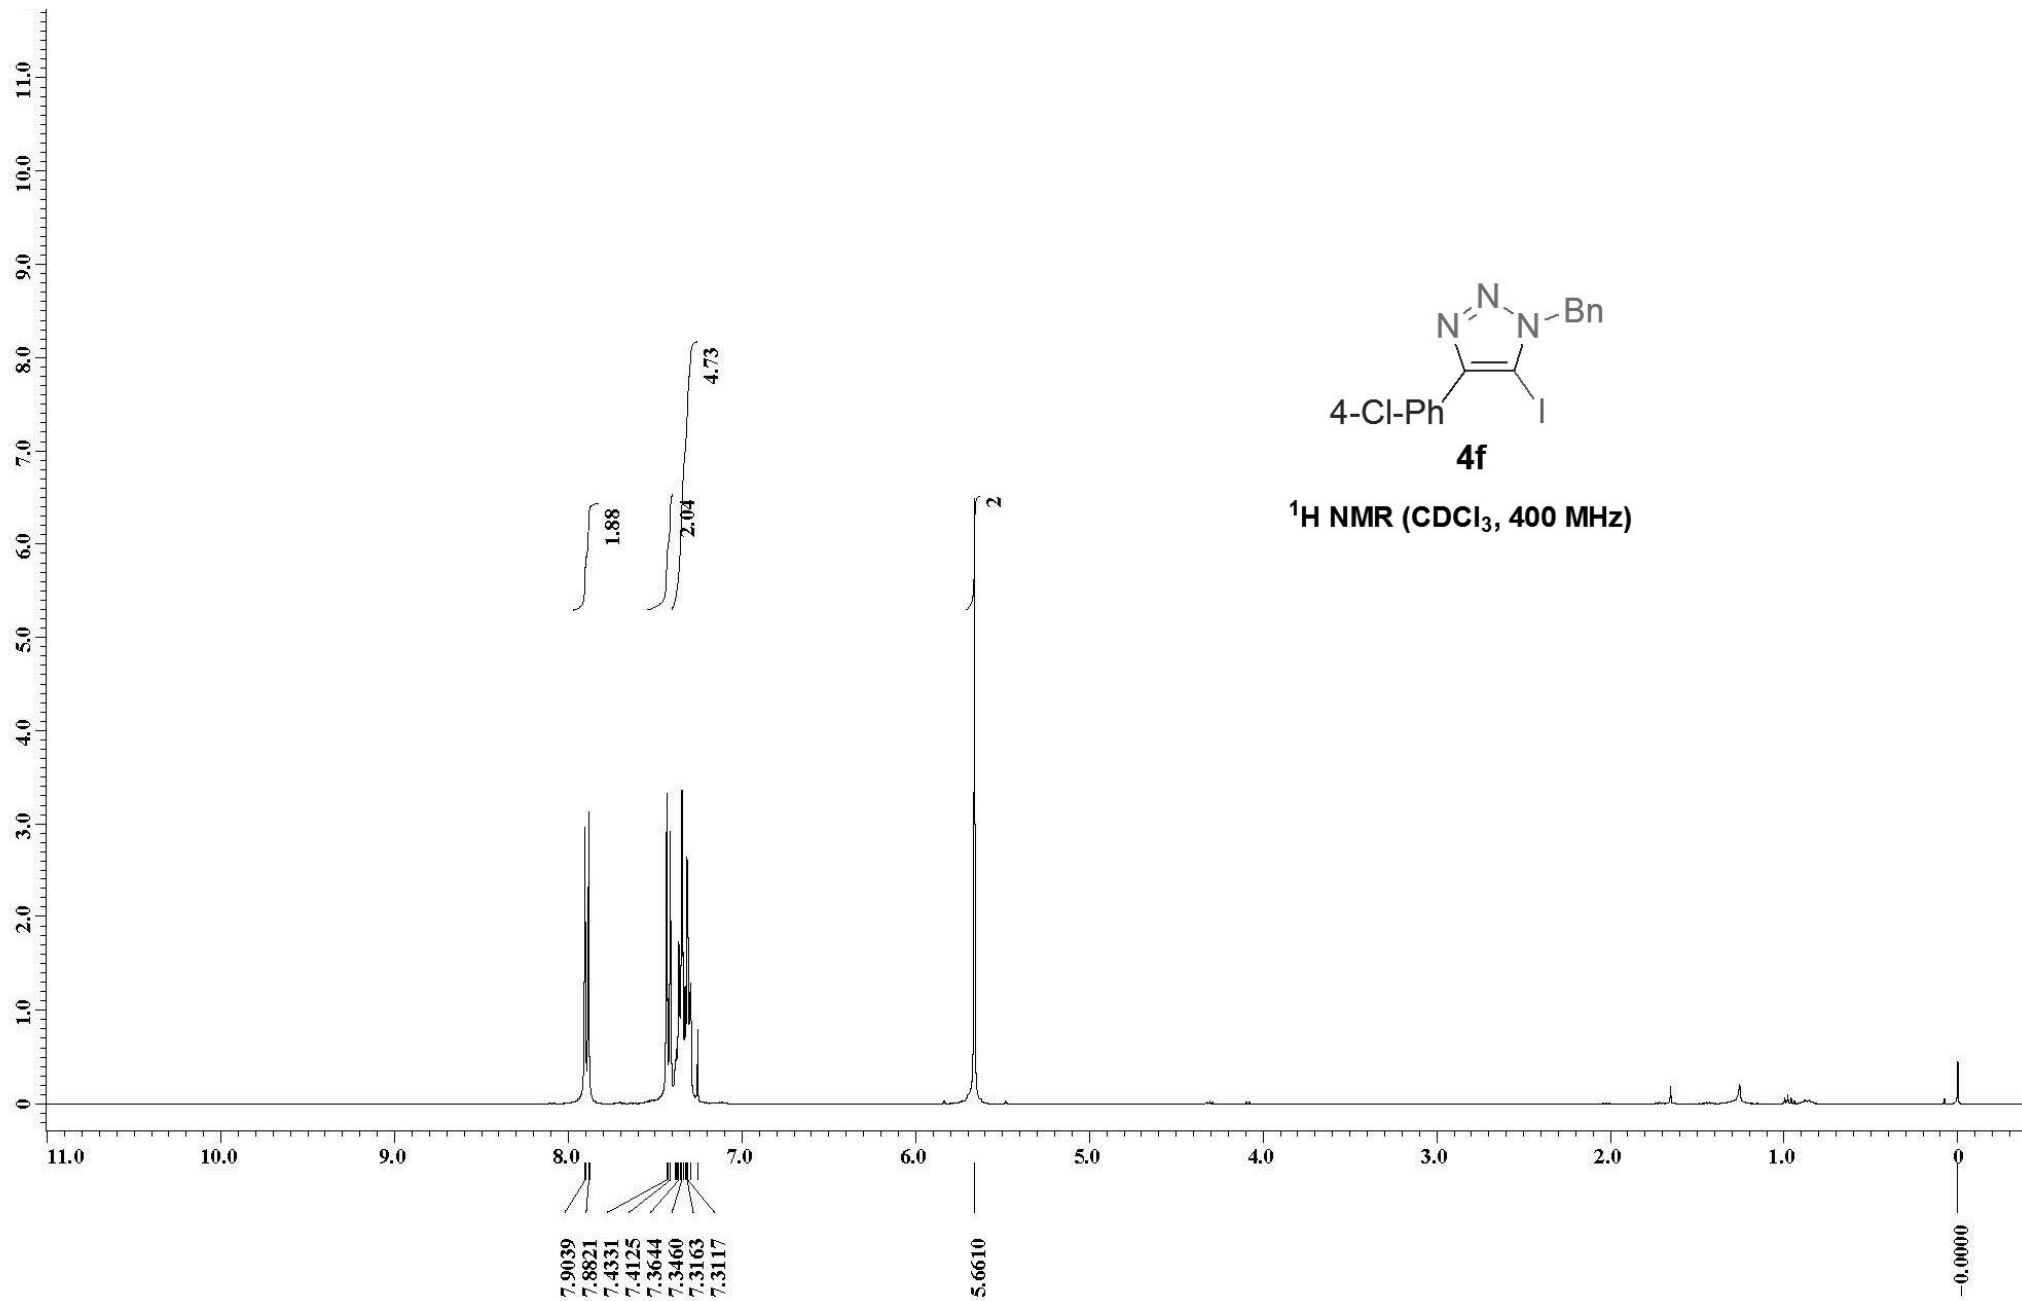

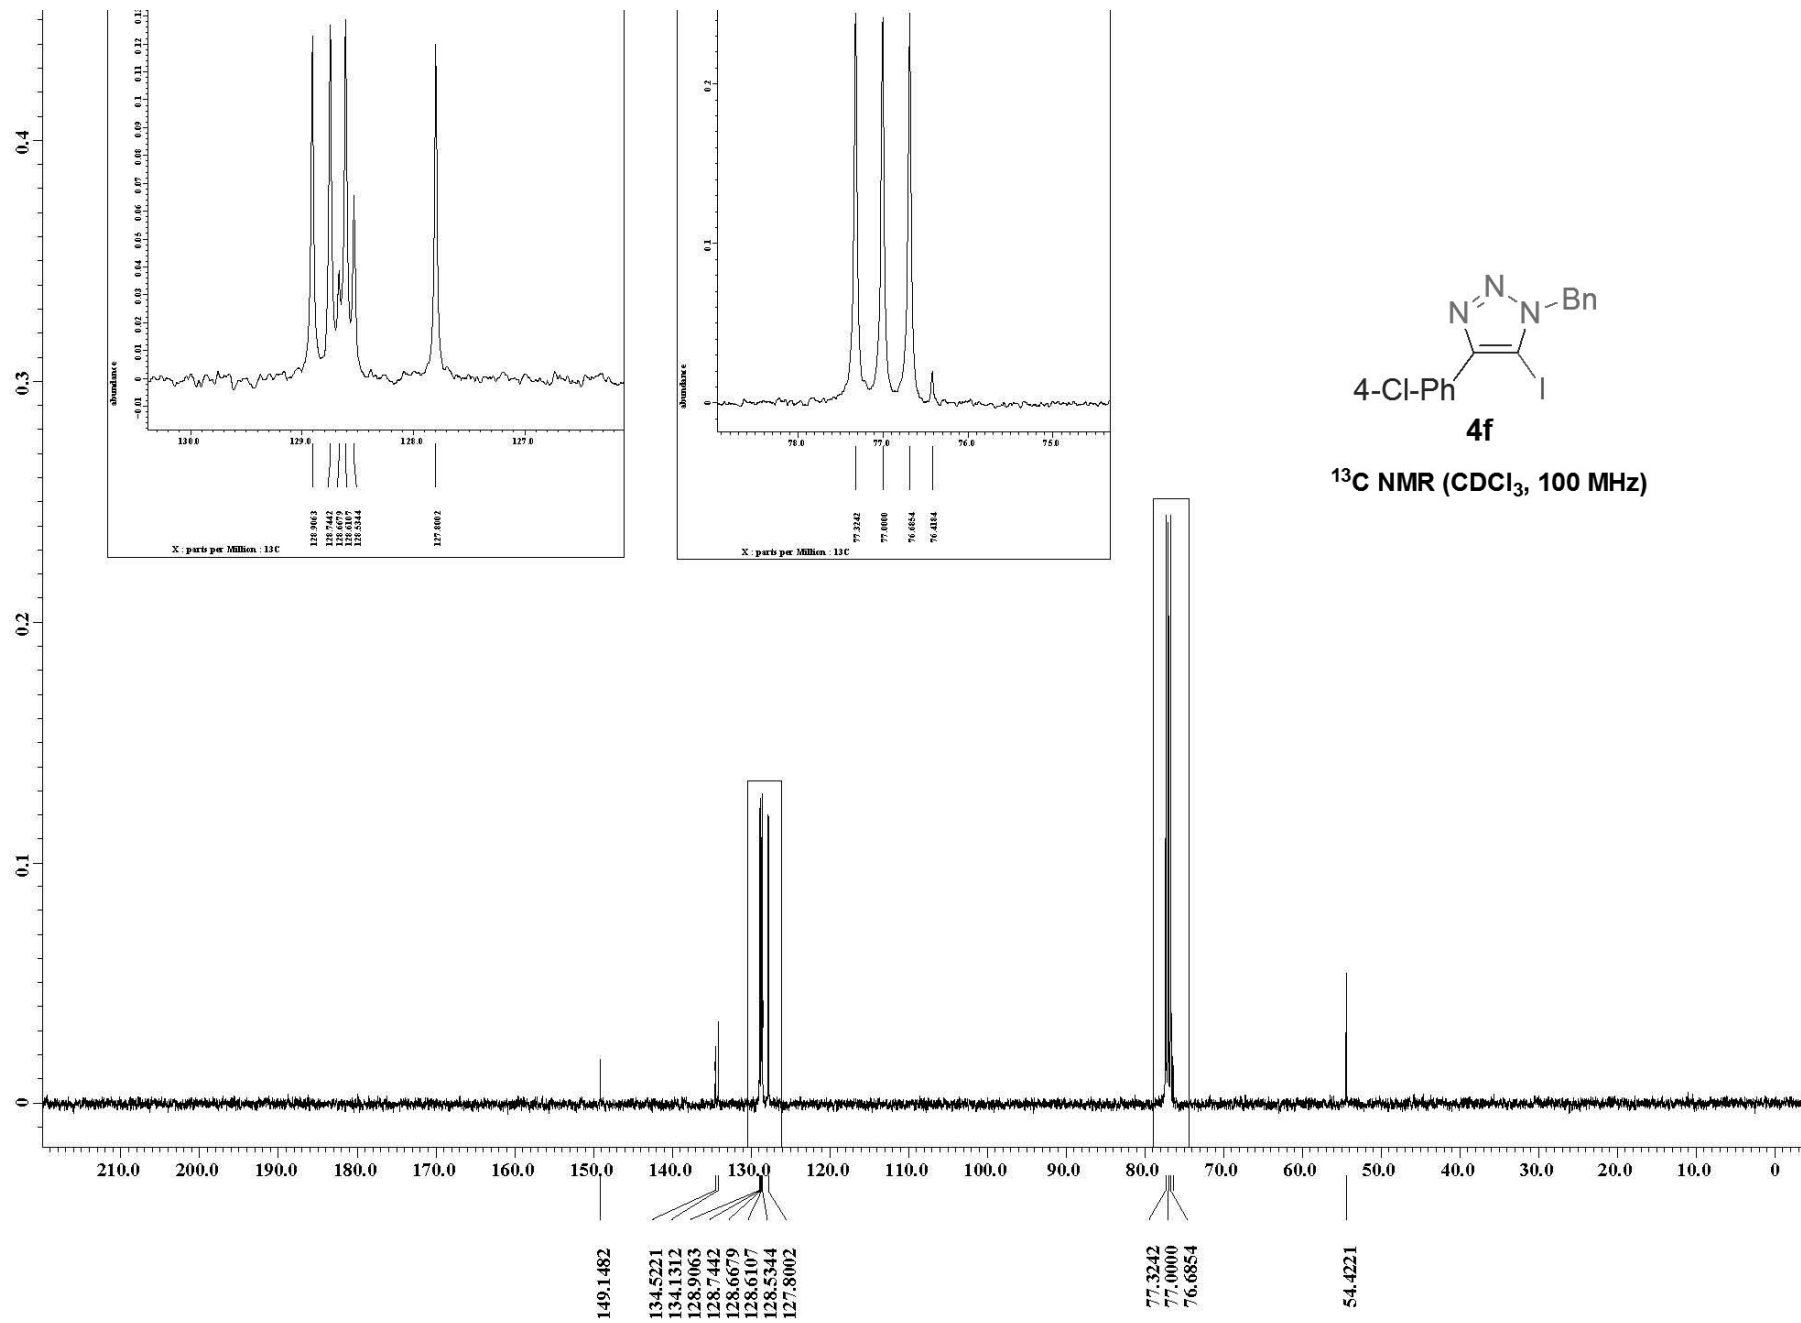

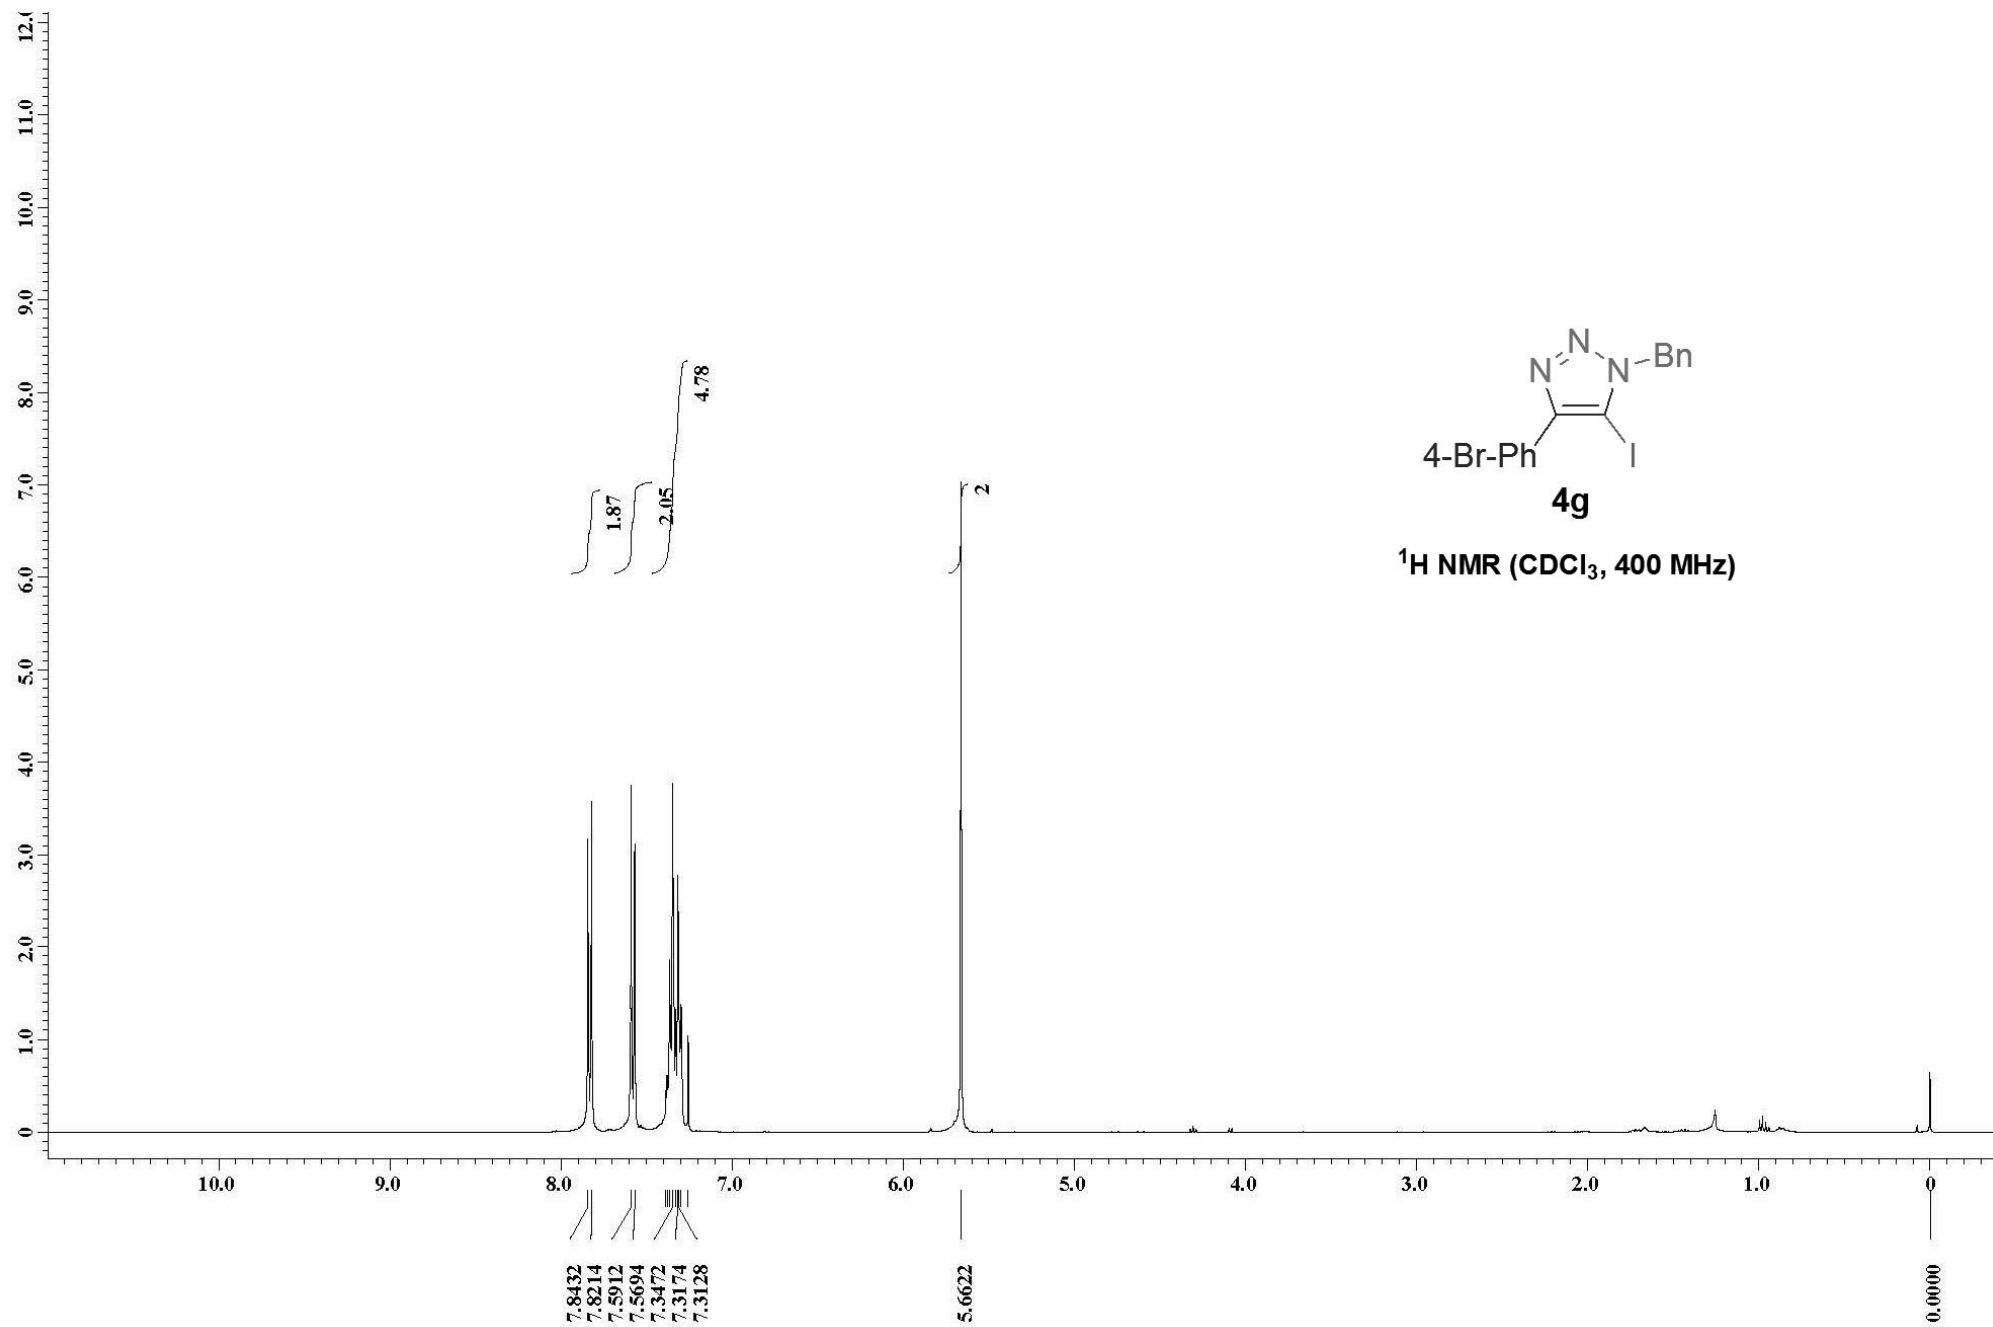

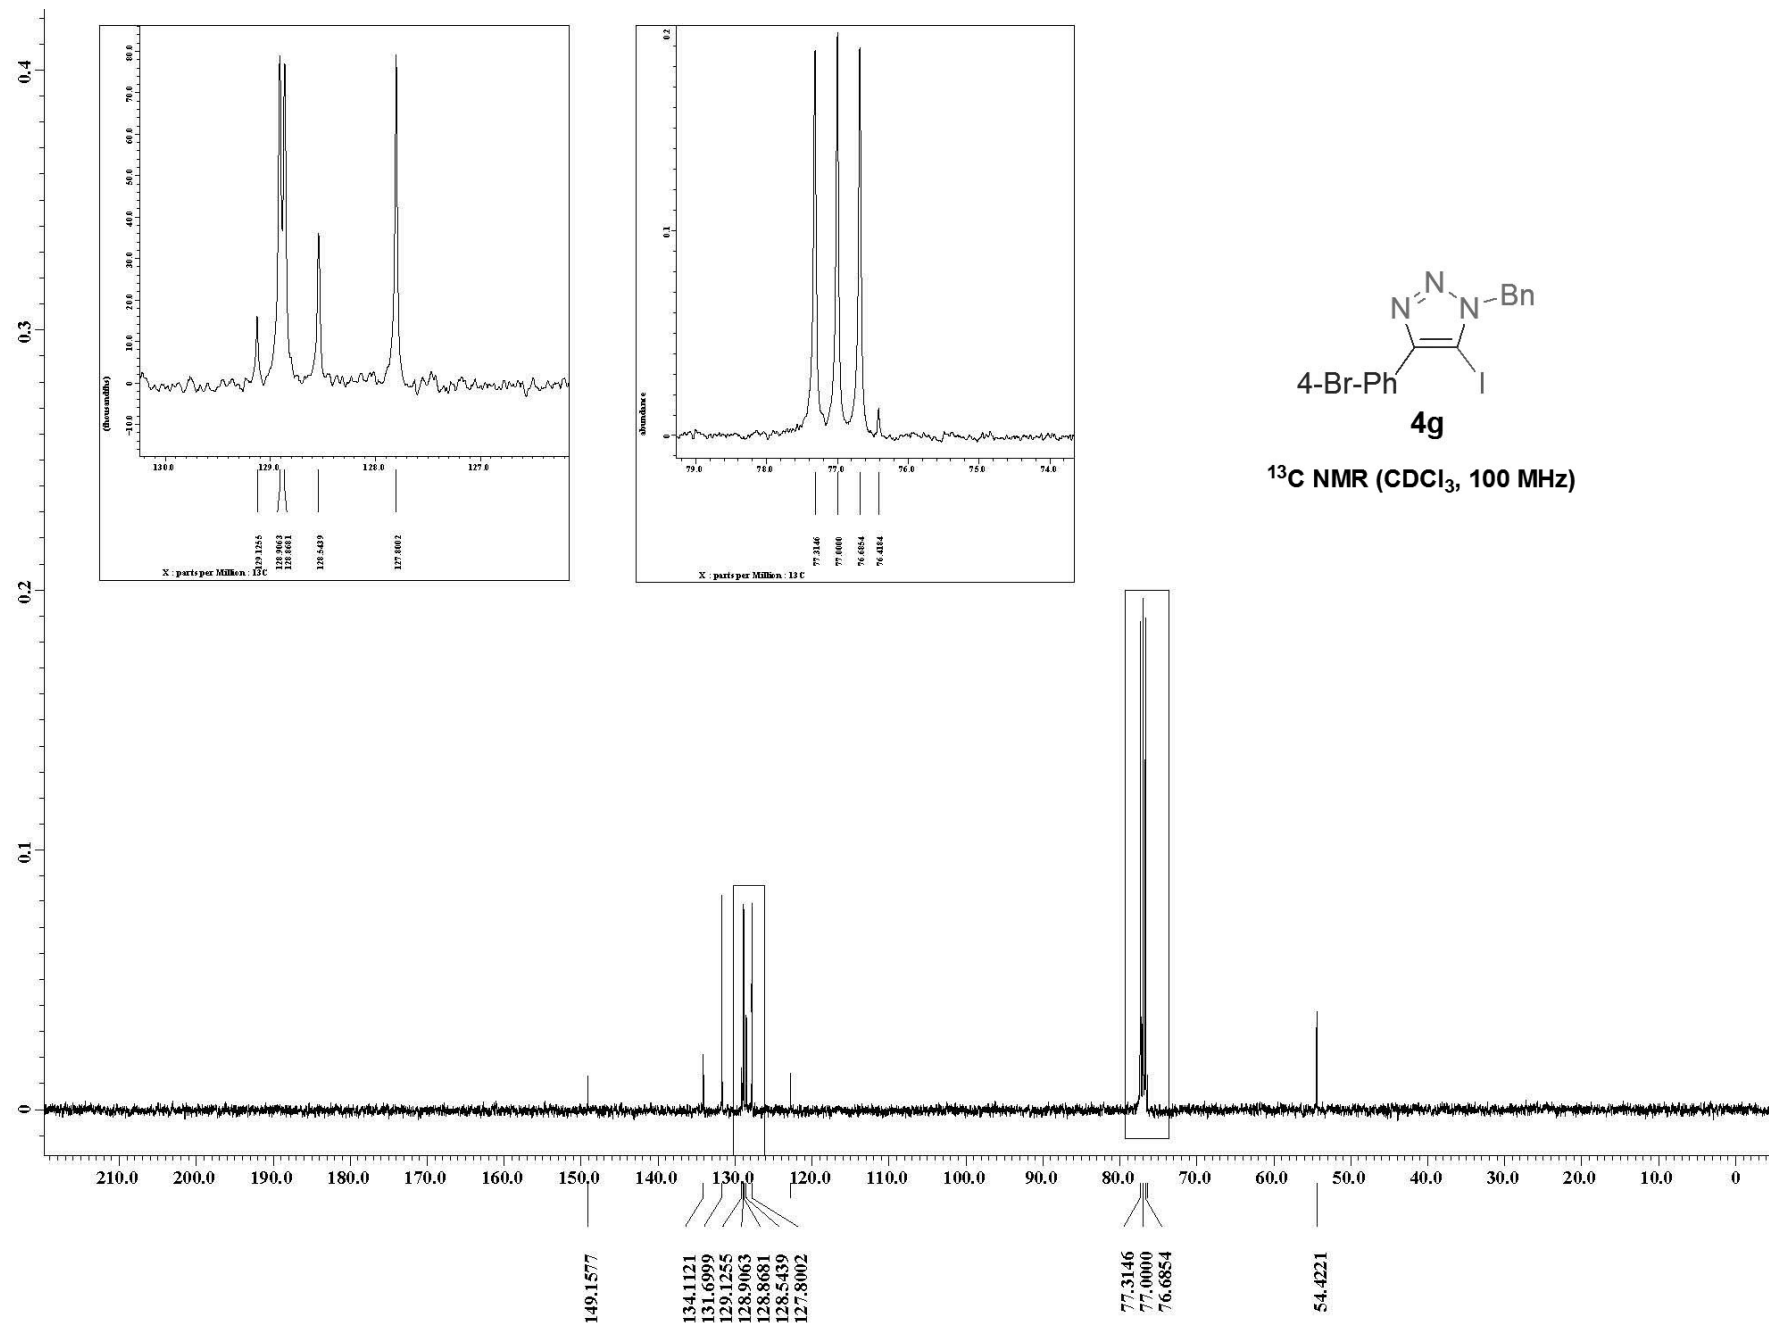



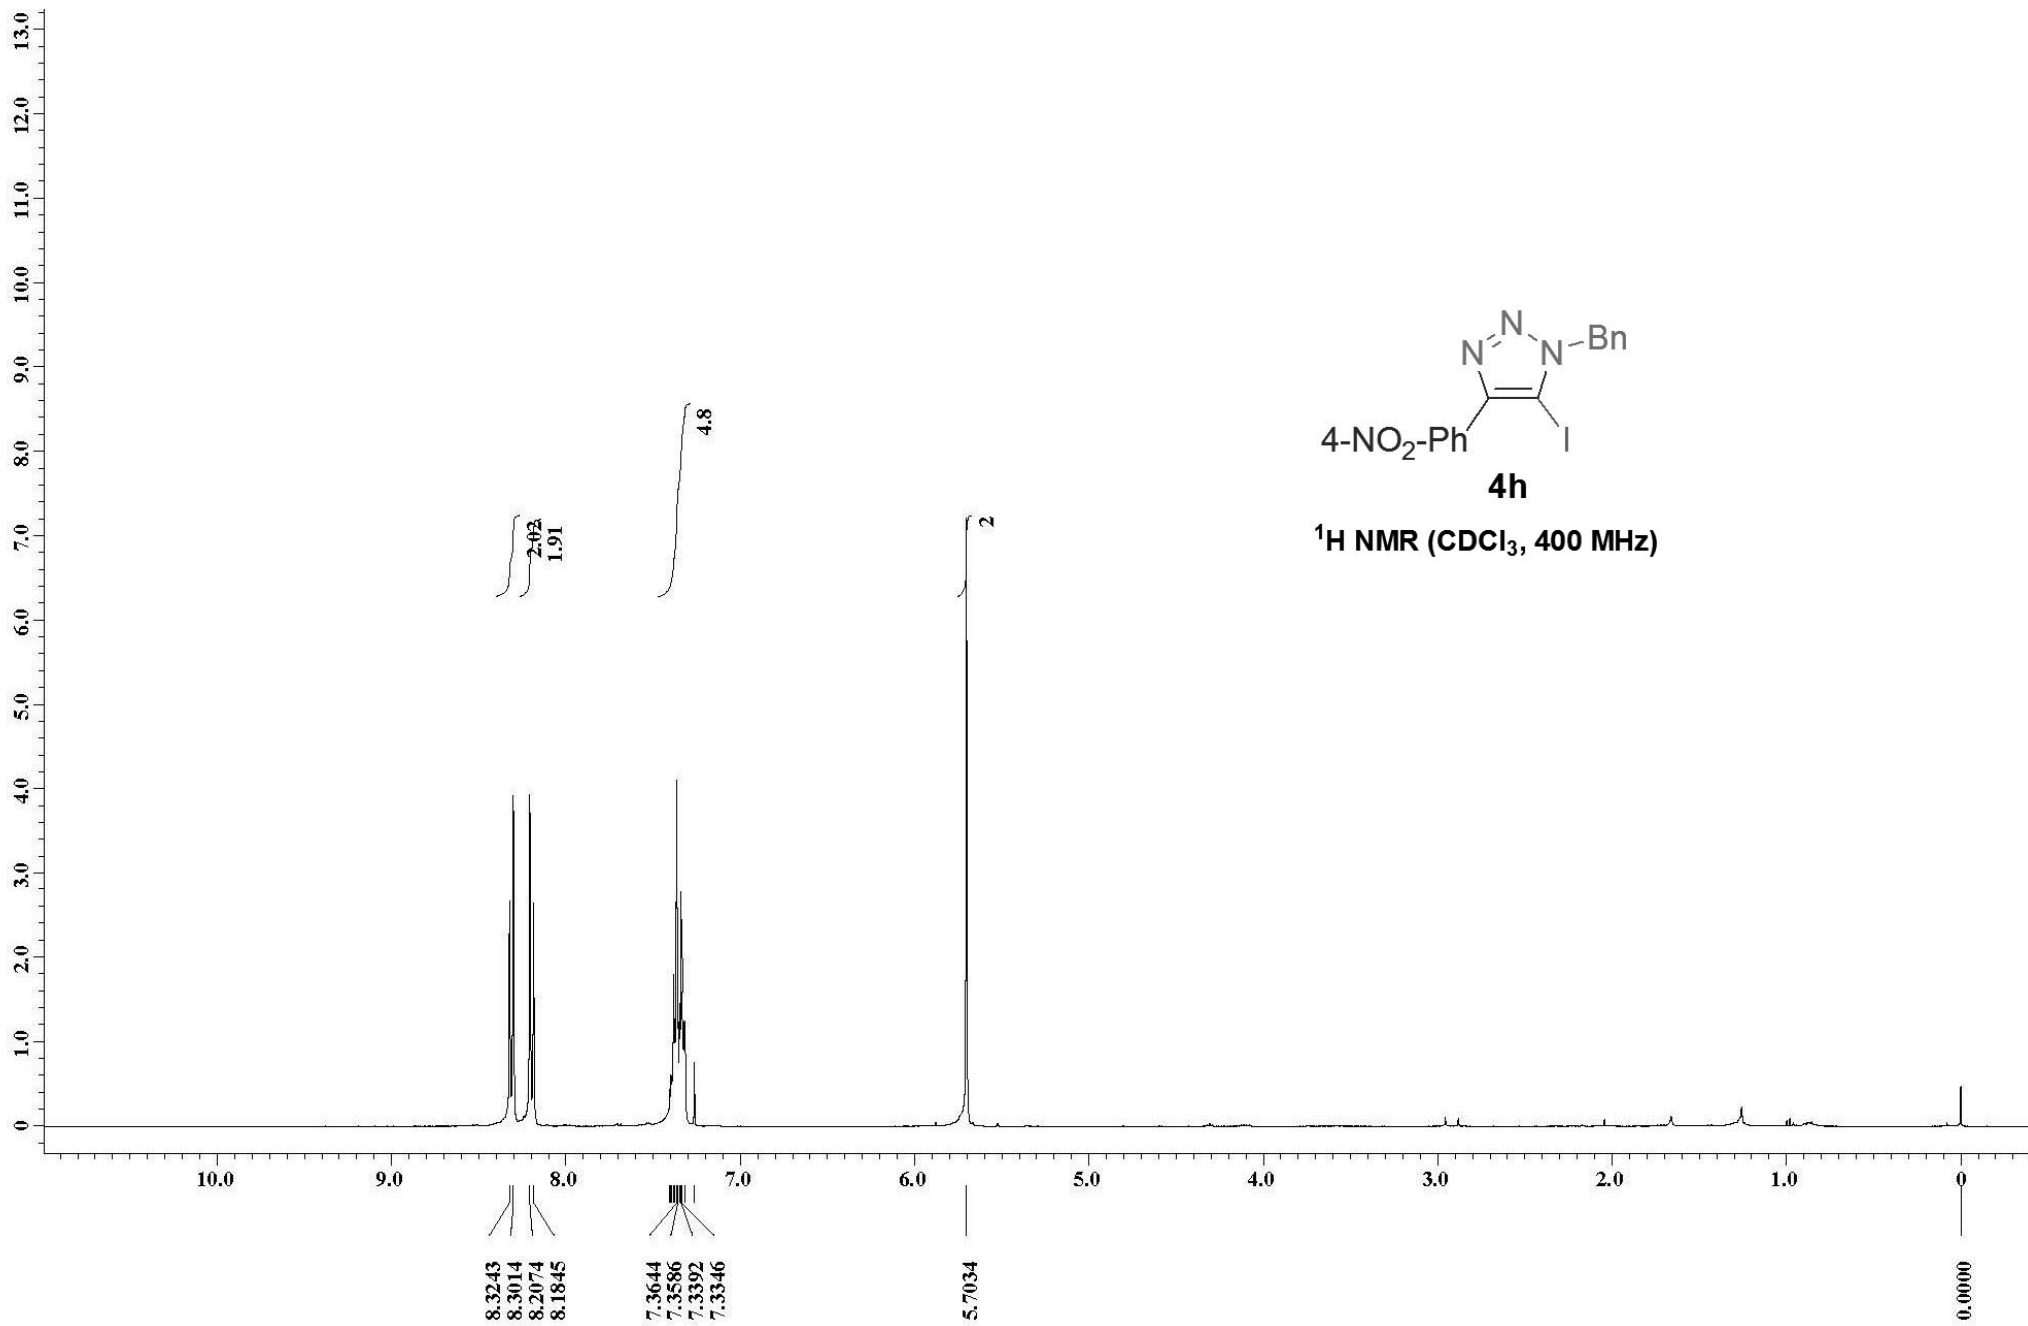

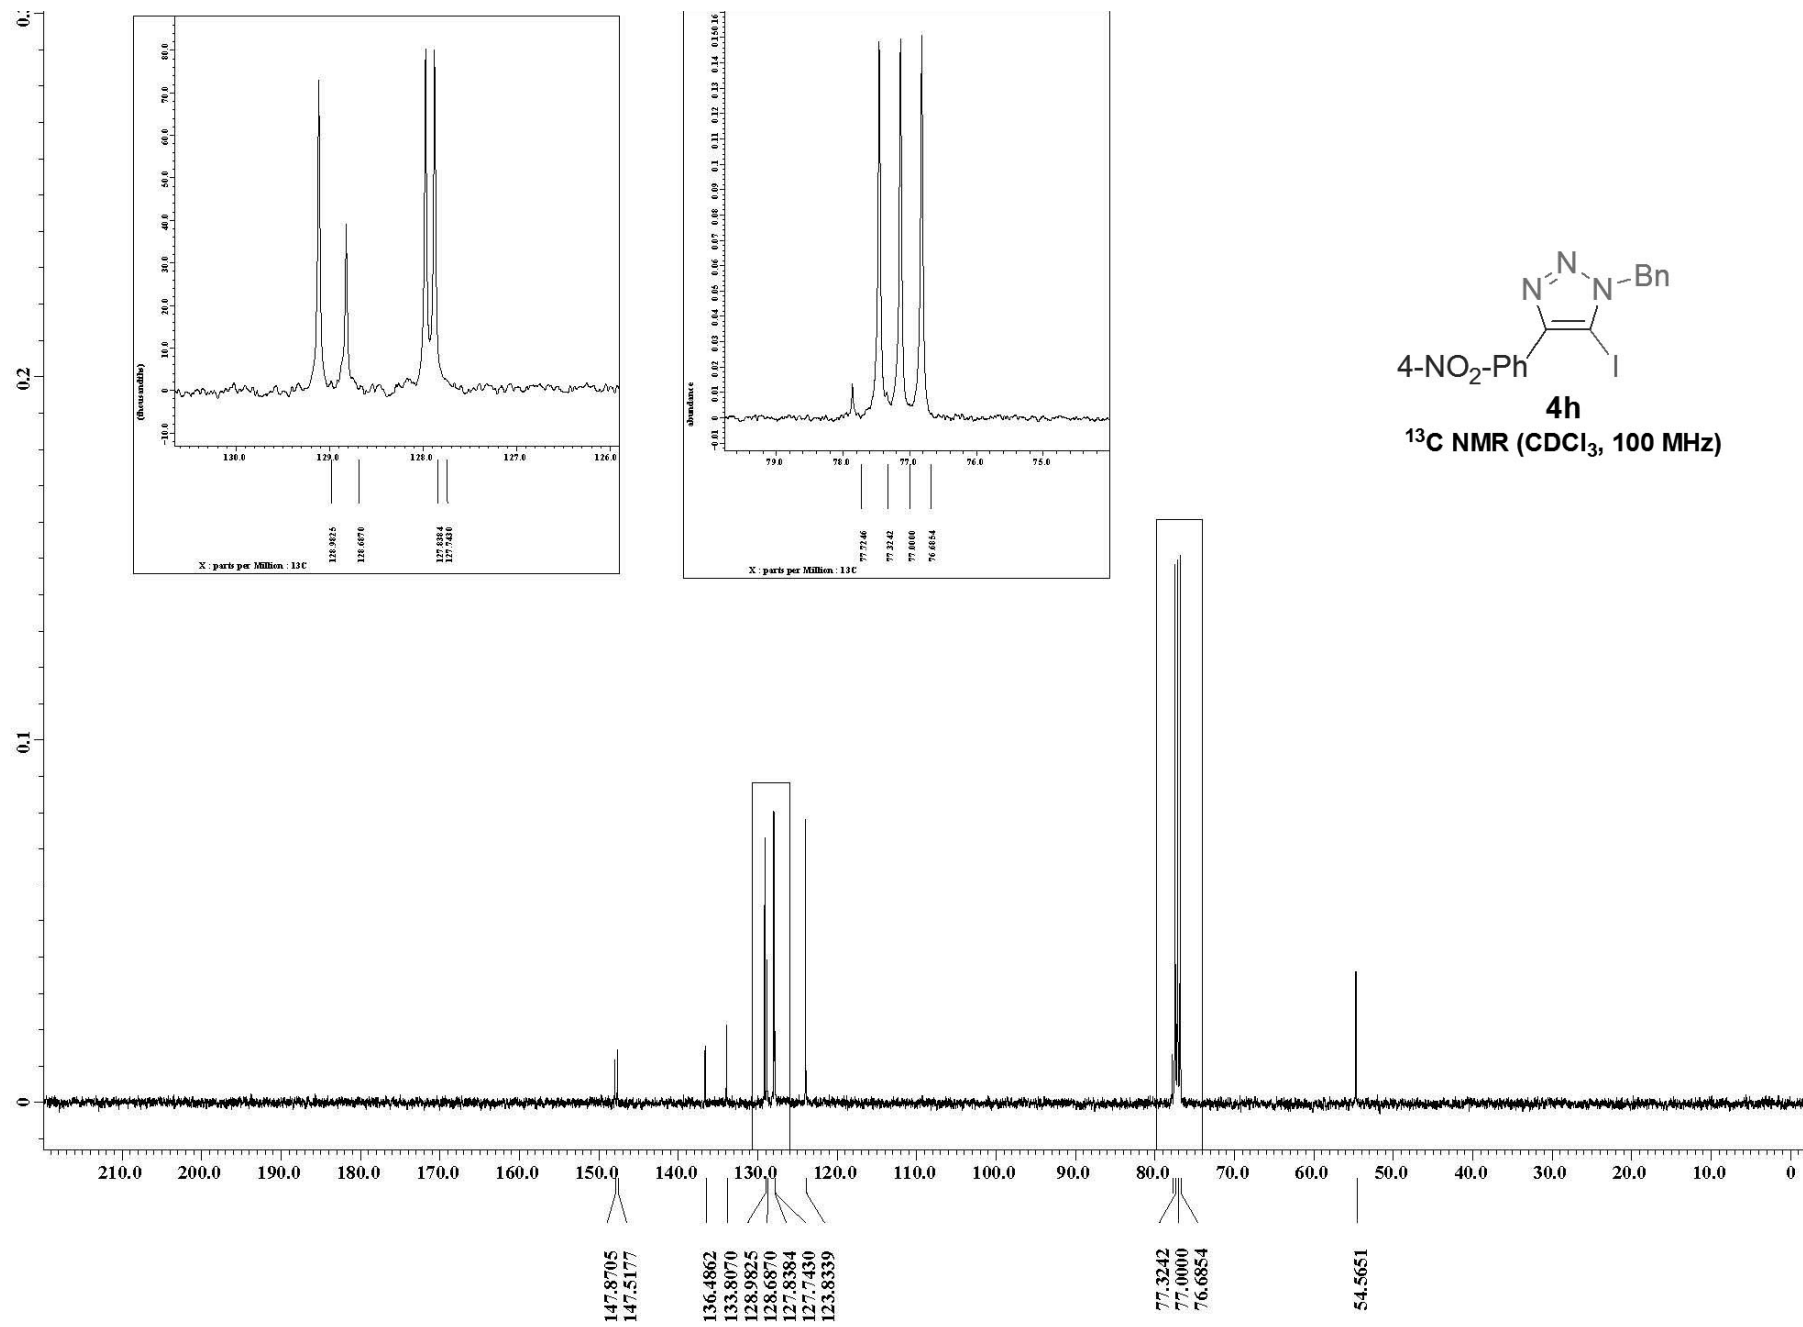

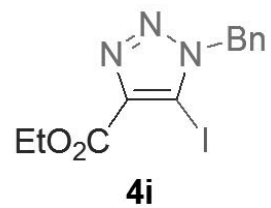

<sup>1</sup>H NMR (CDCl<sub>3</sub>, 400 MHz)

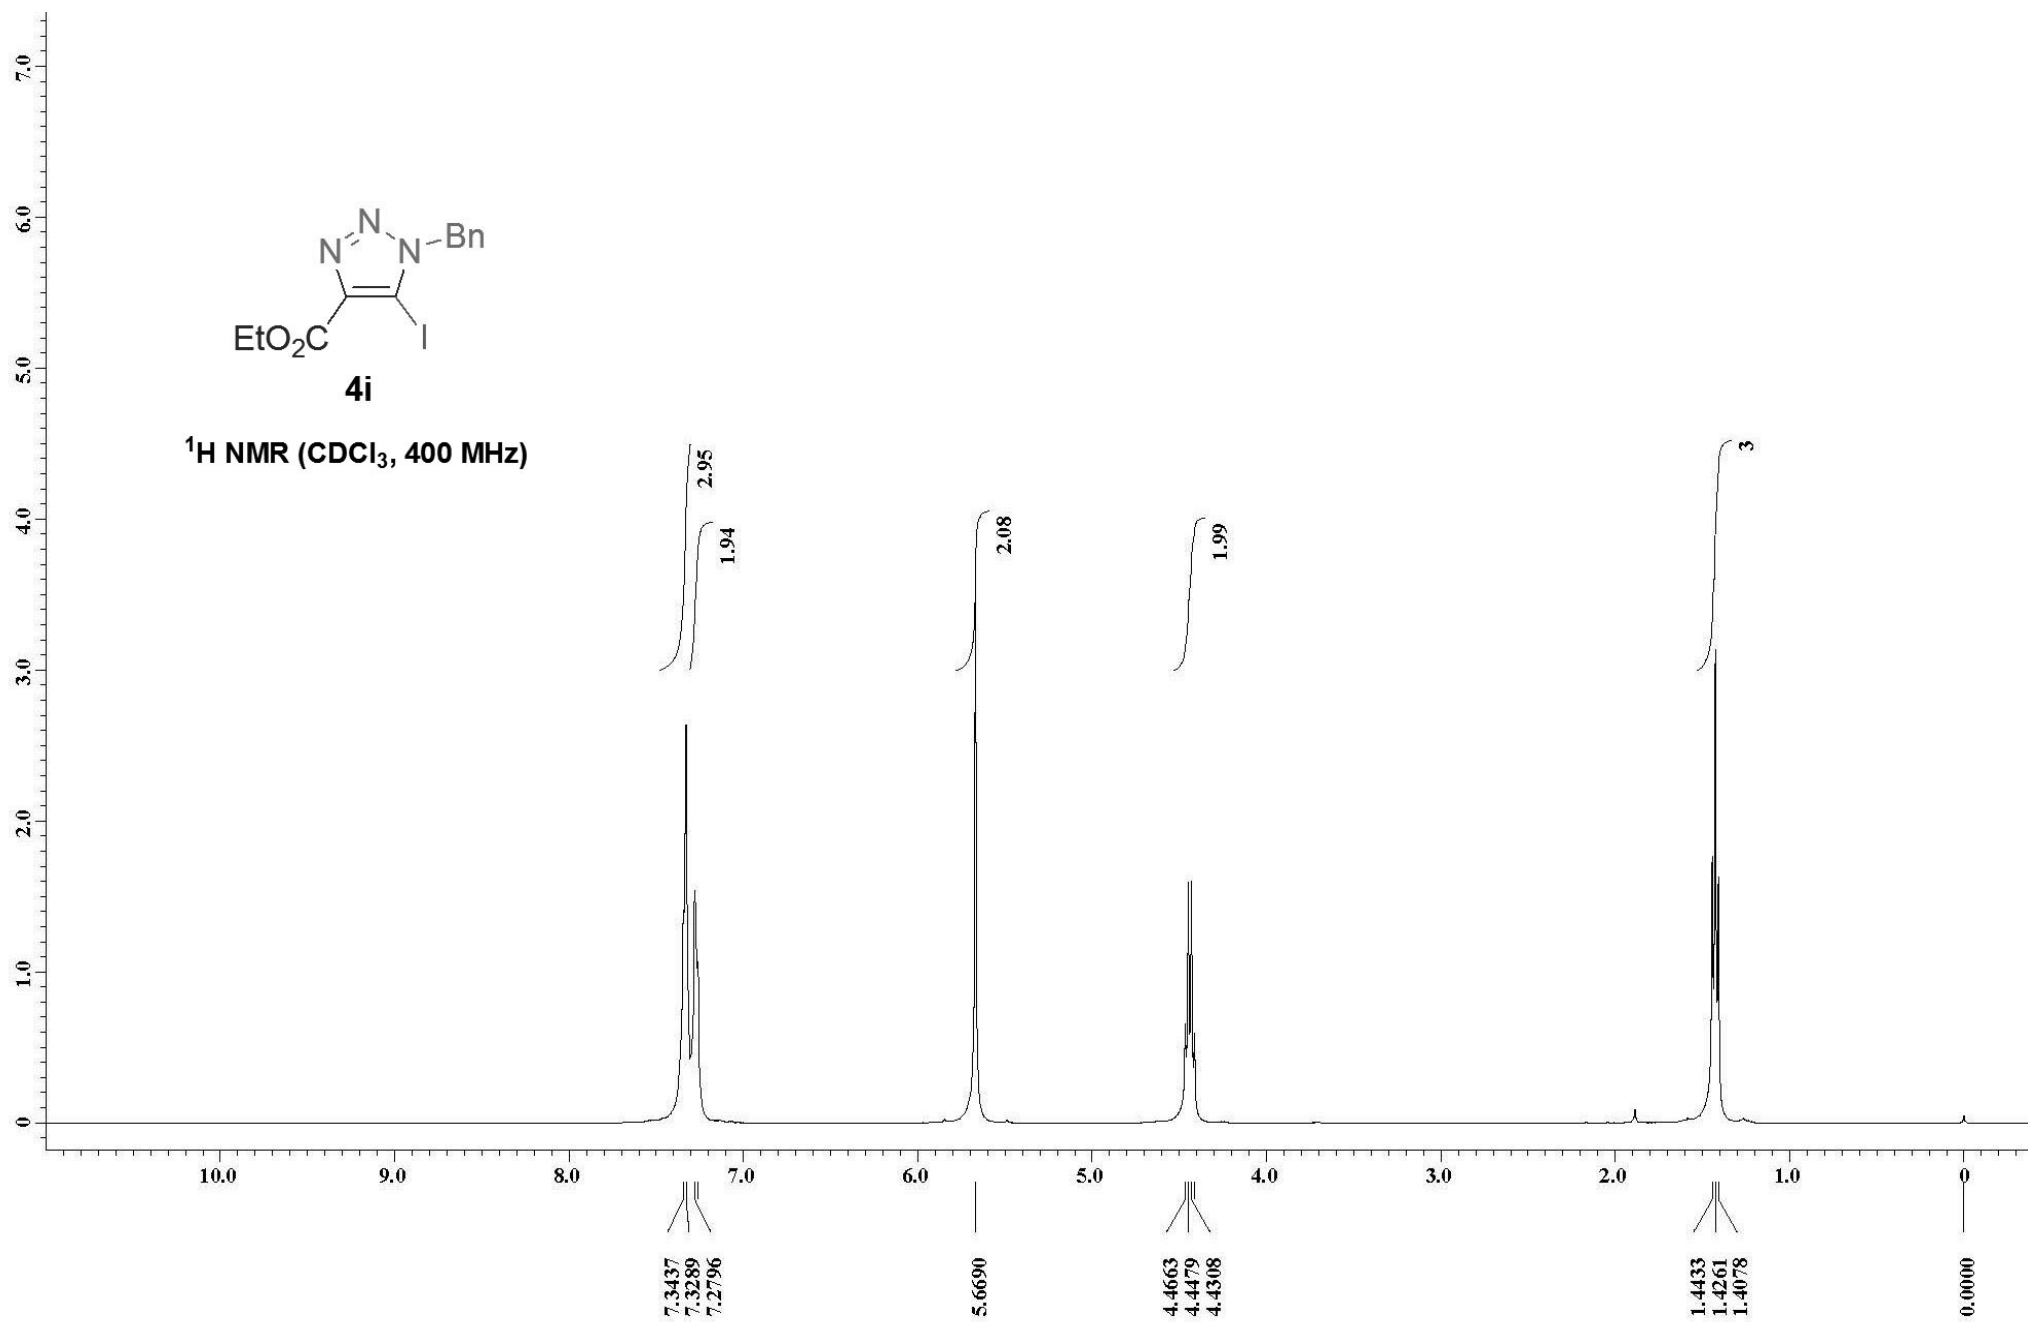

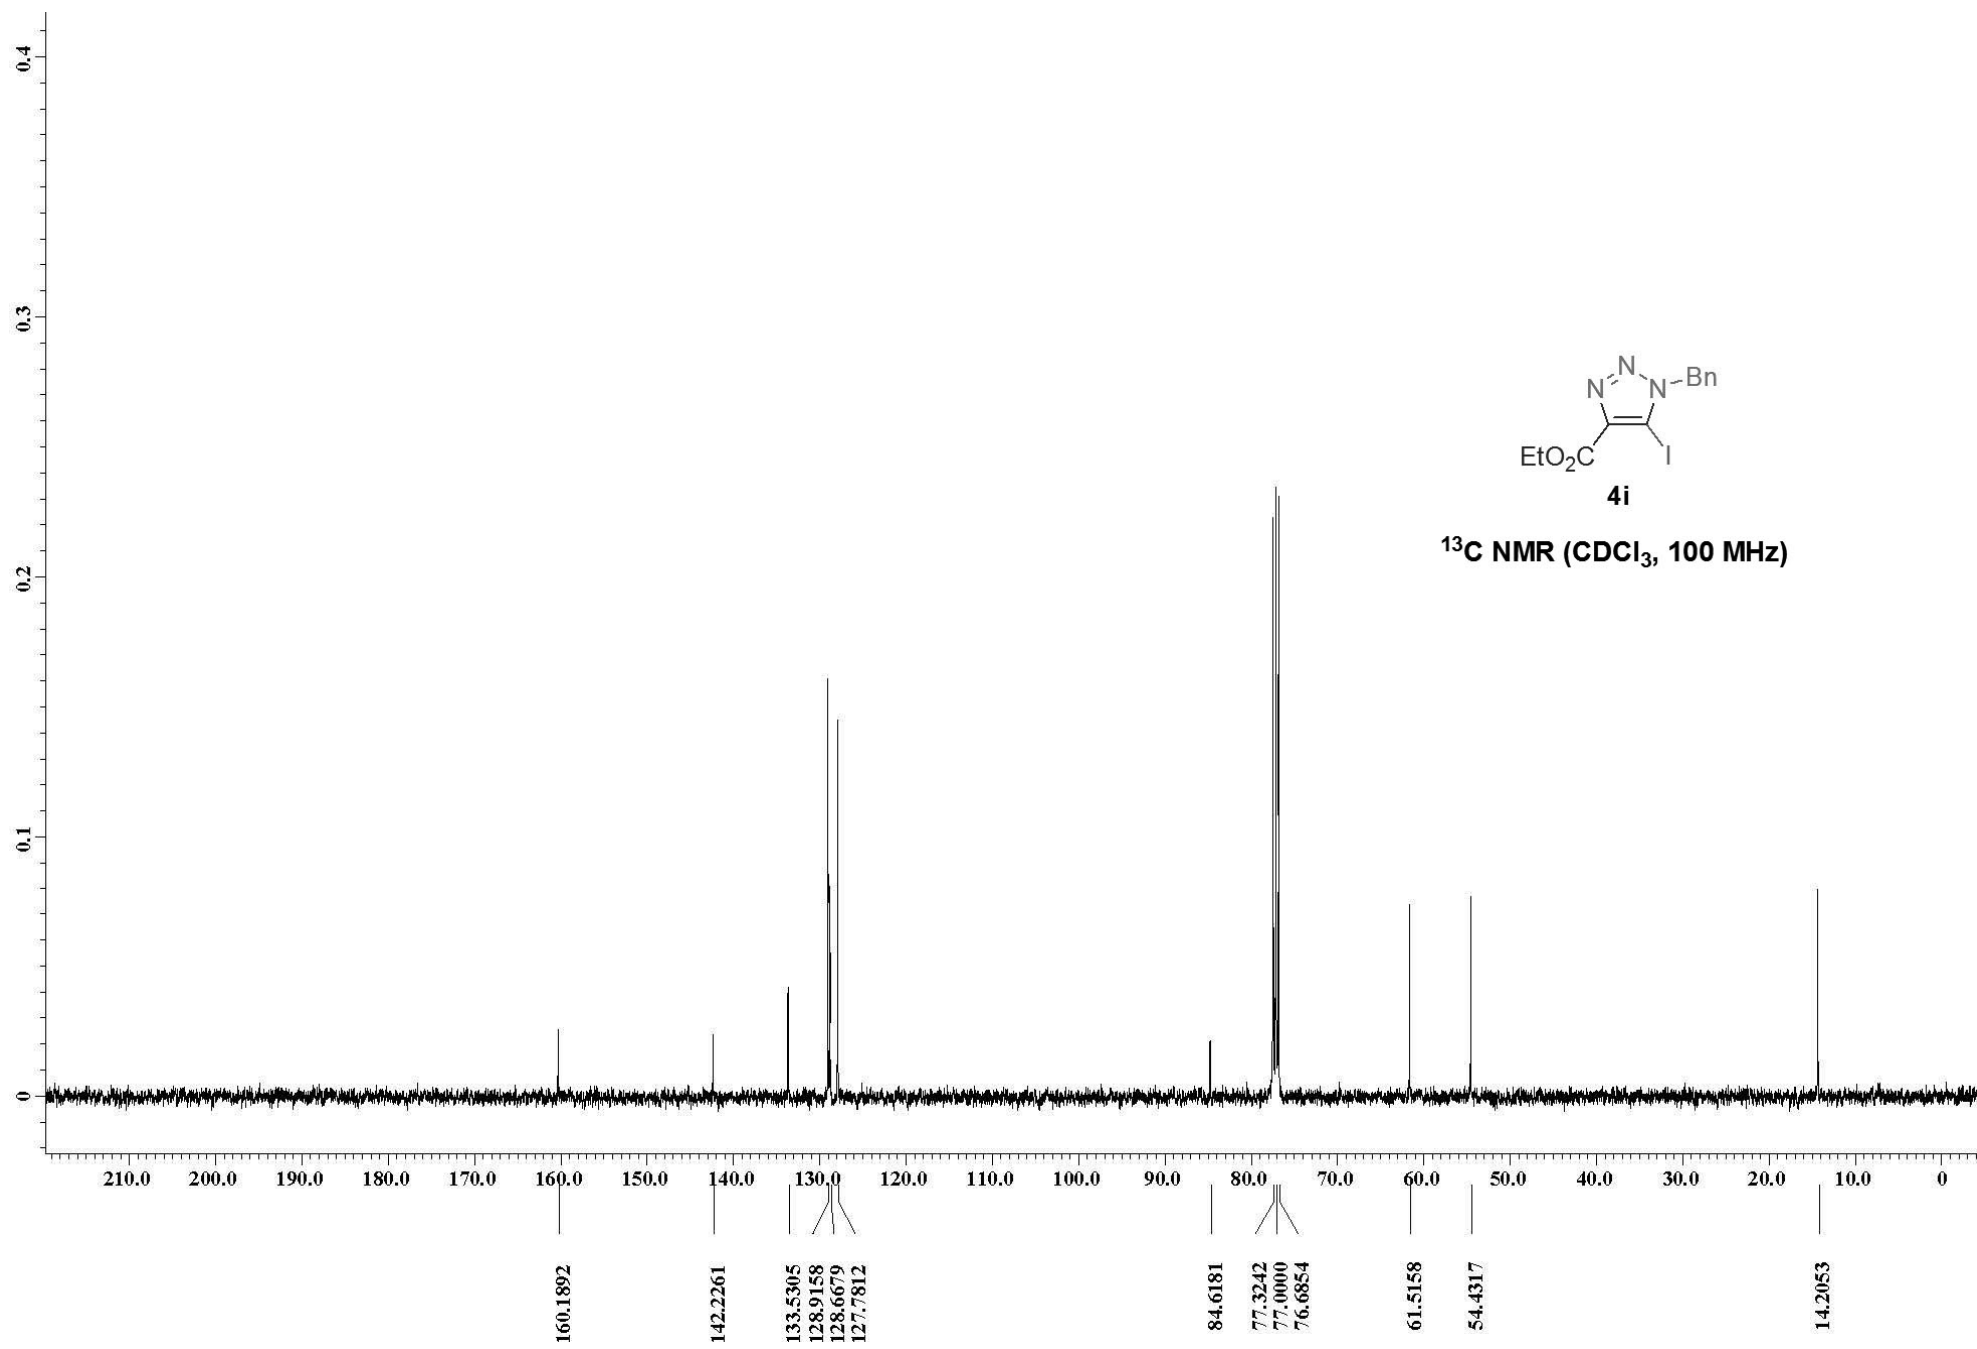

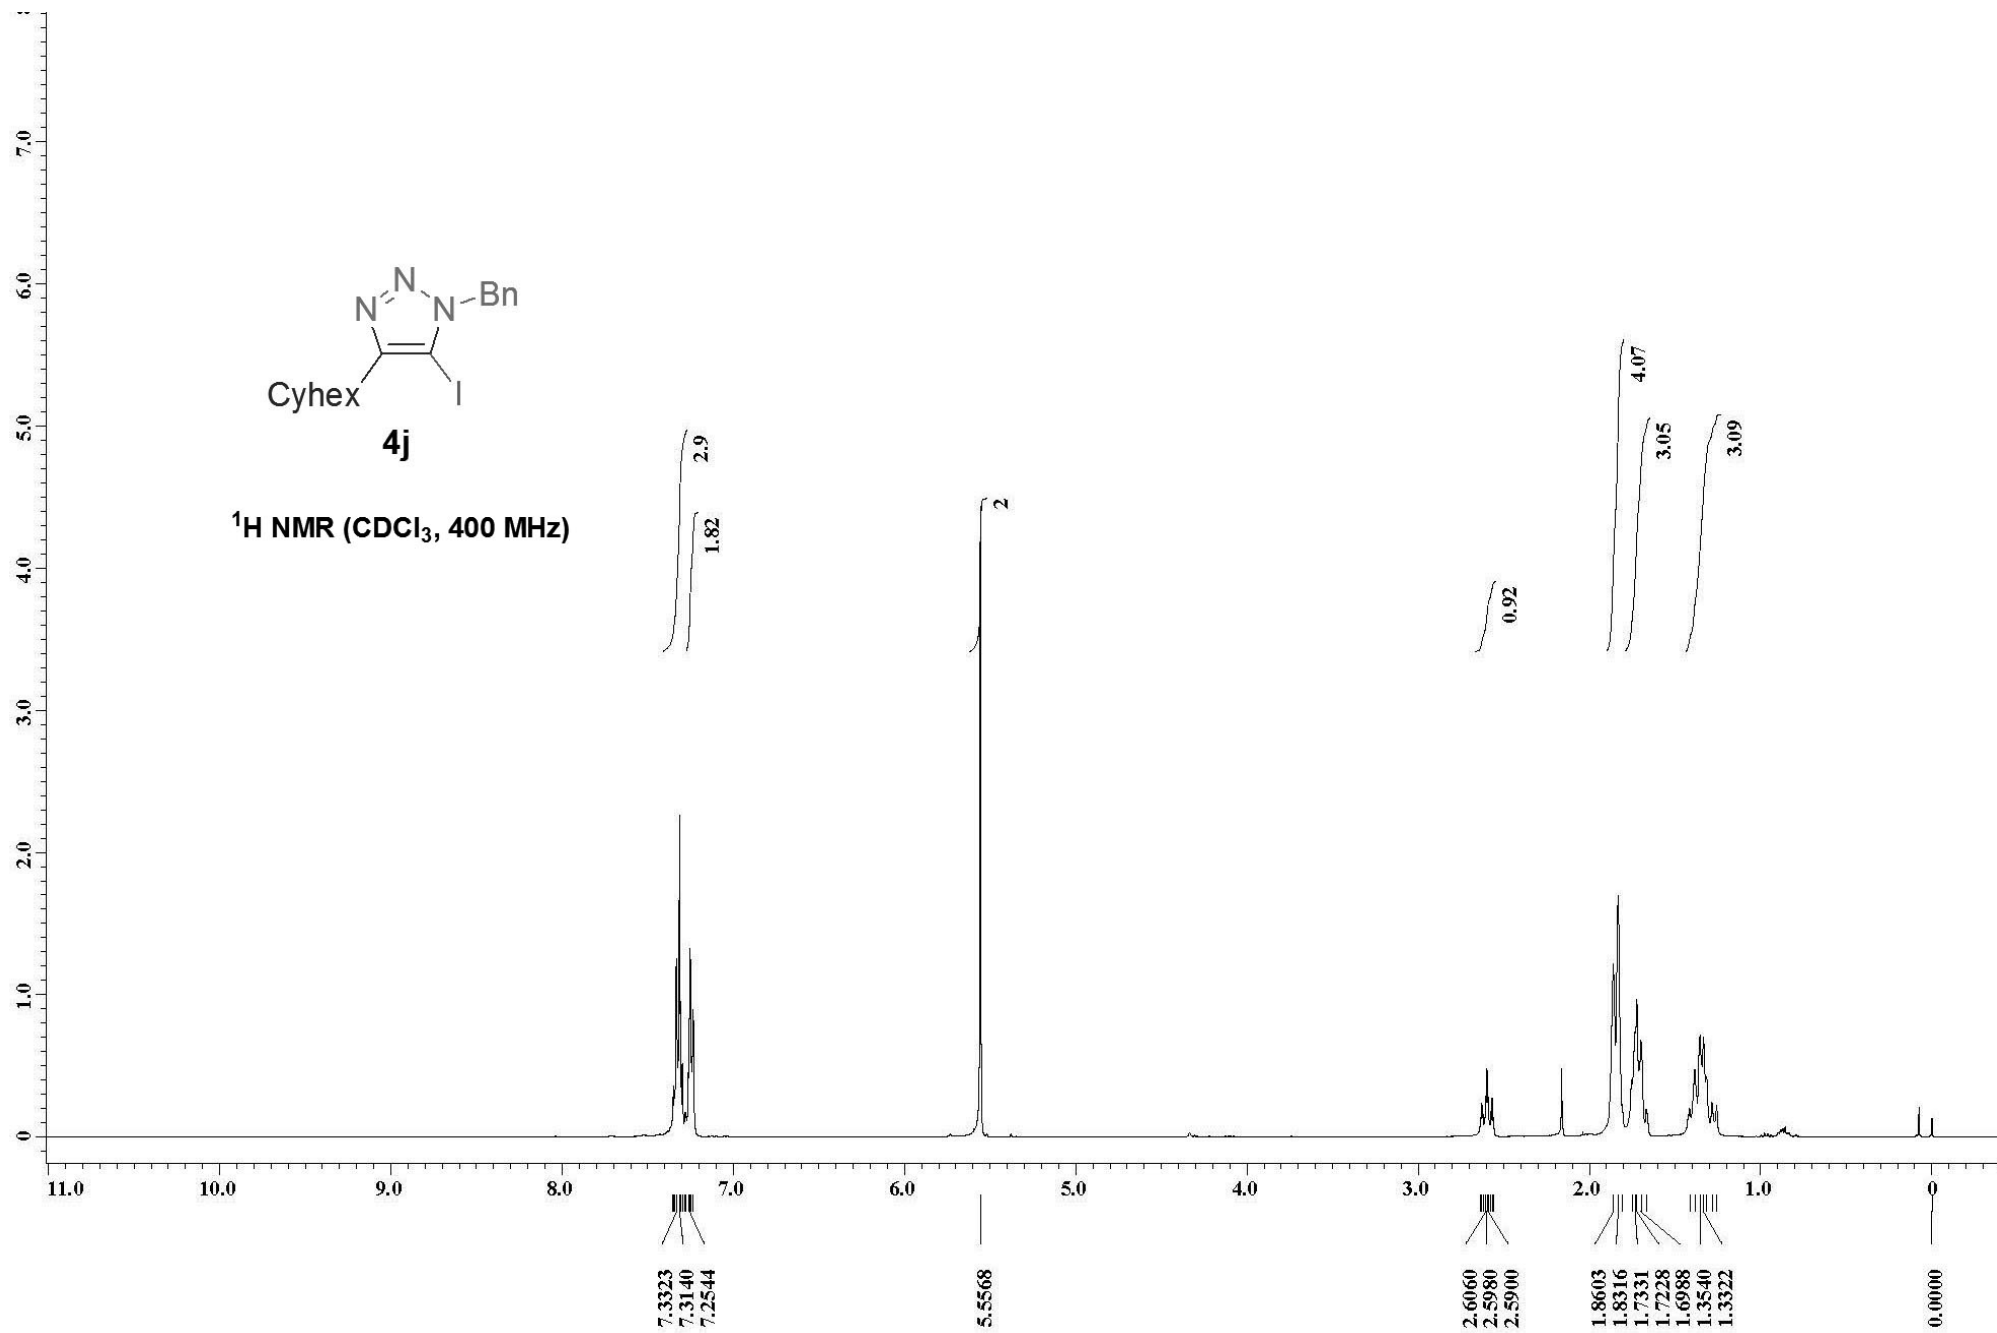

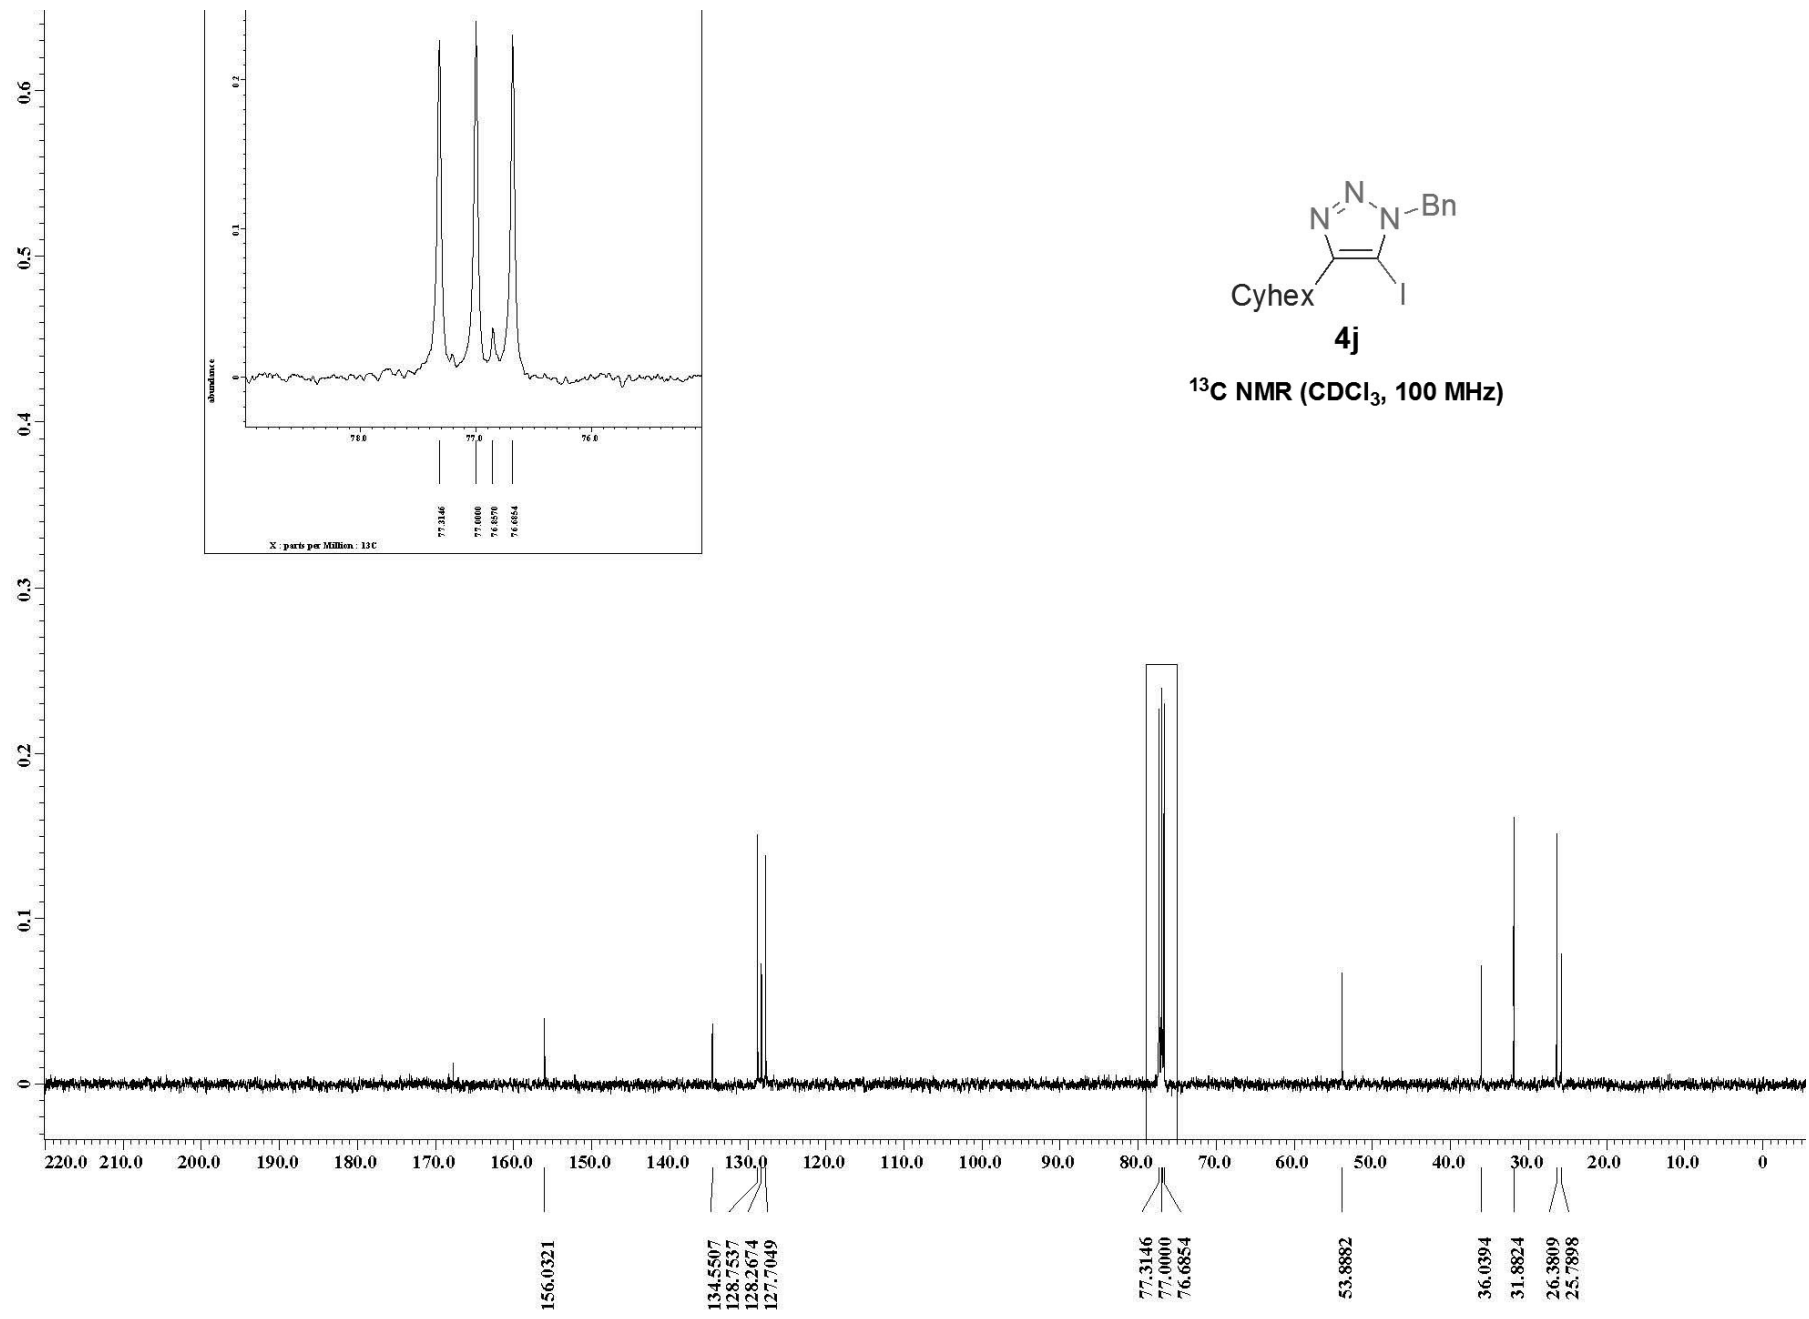

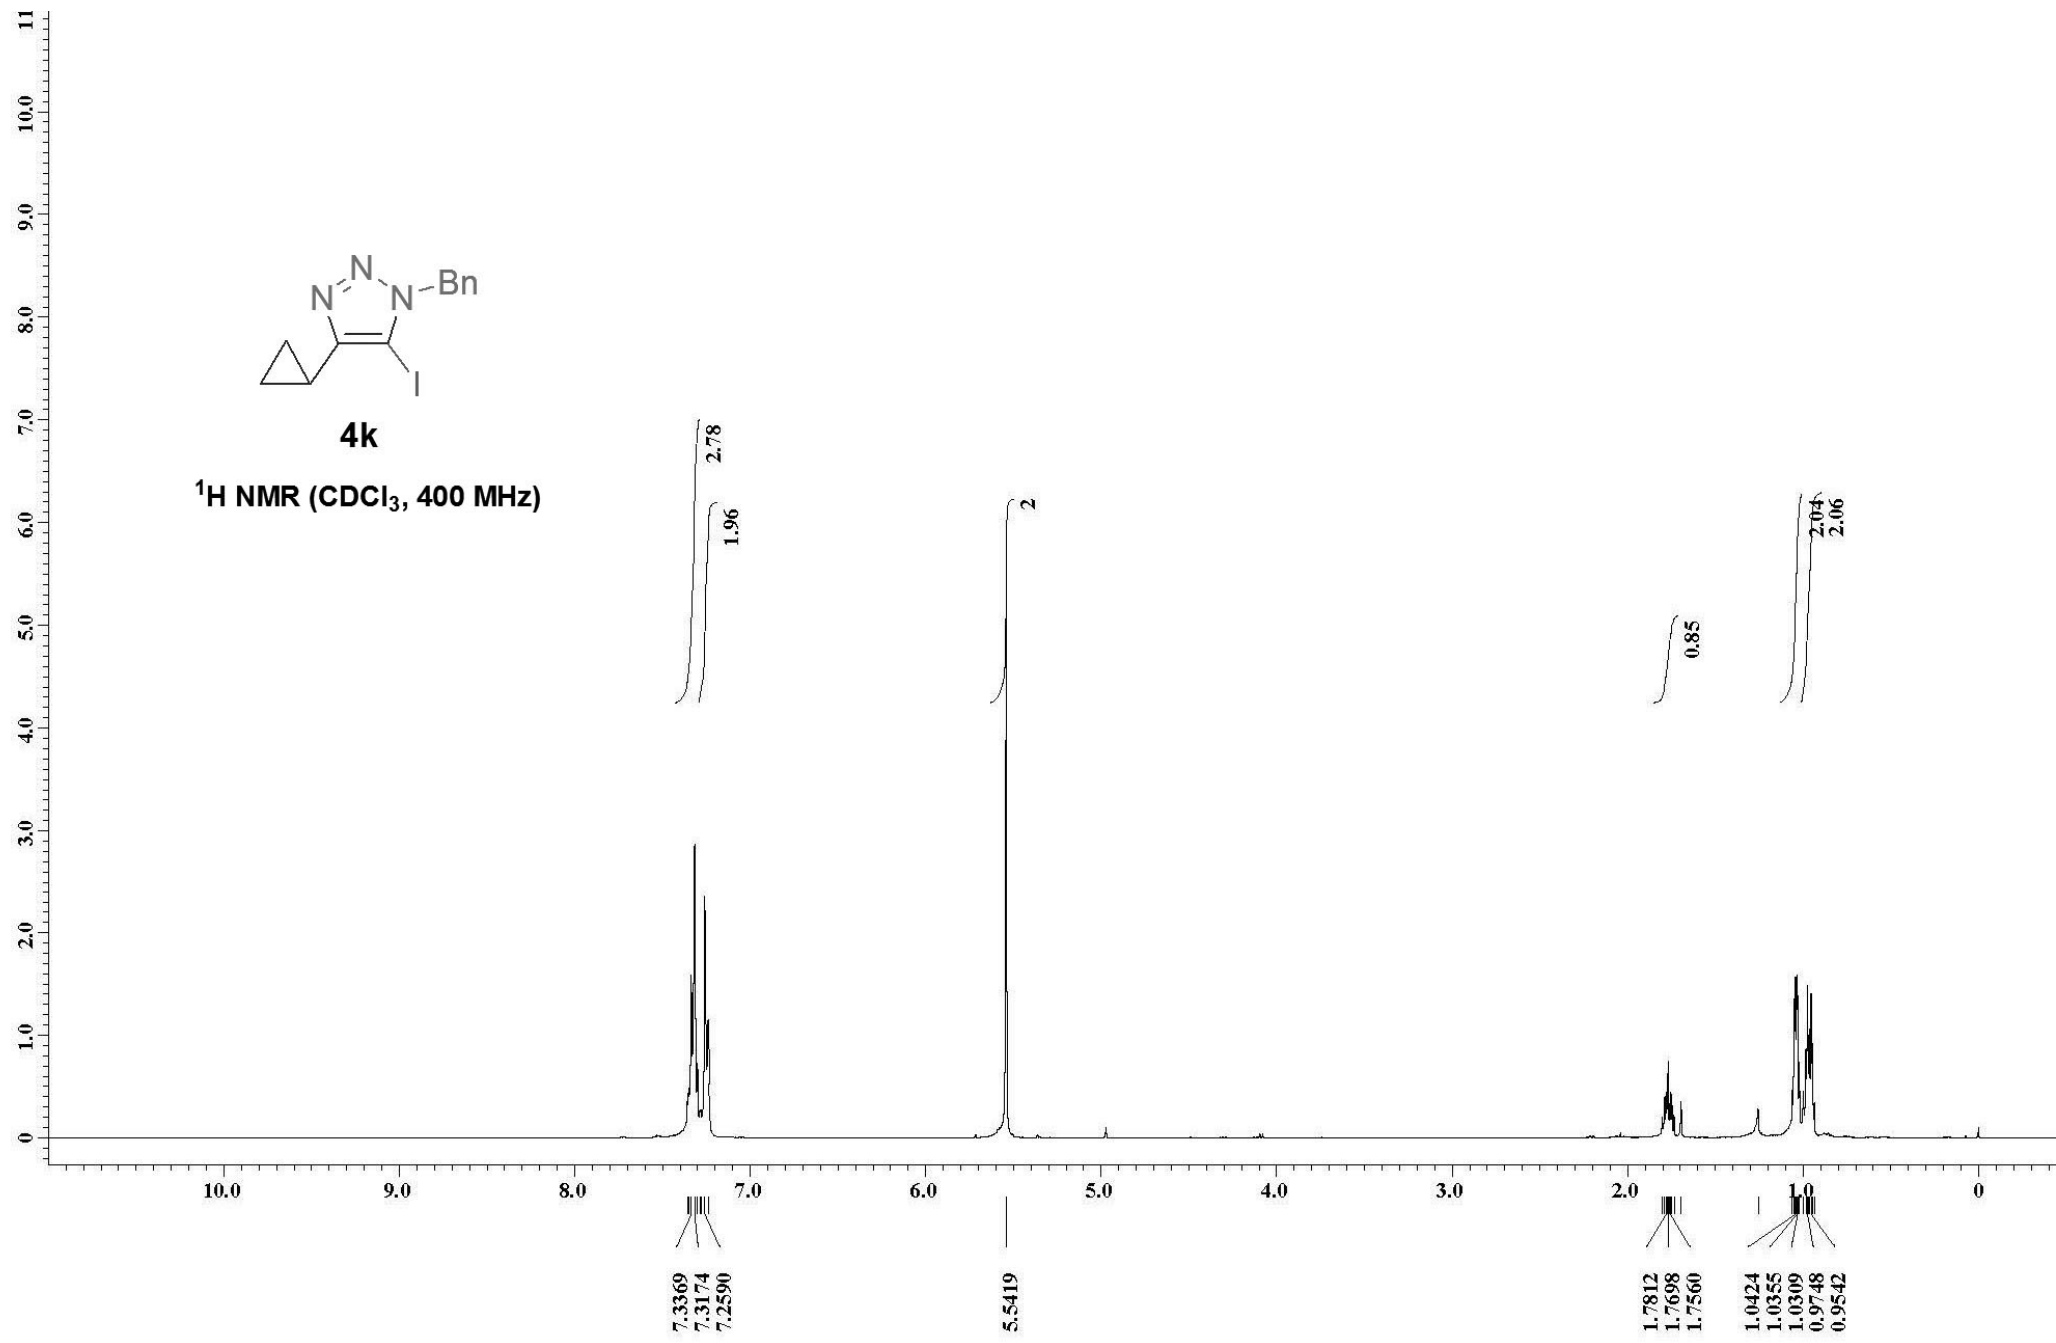

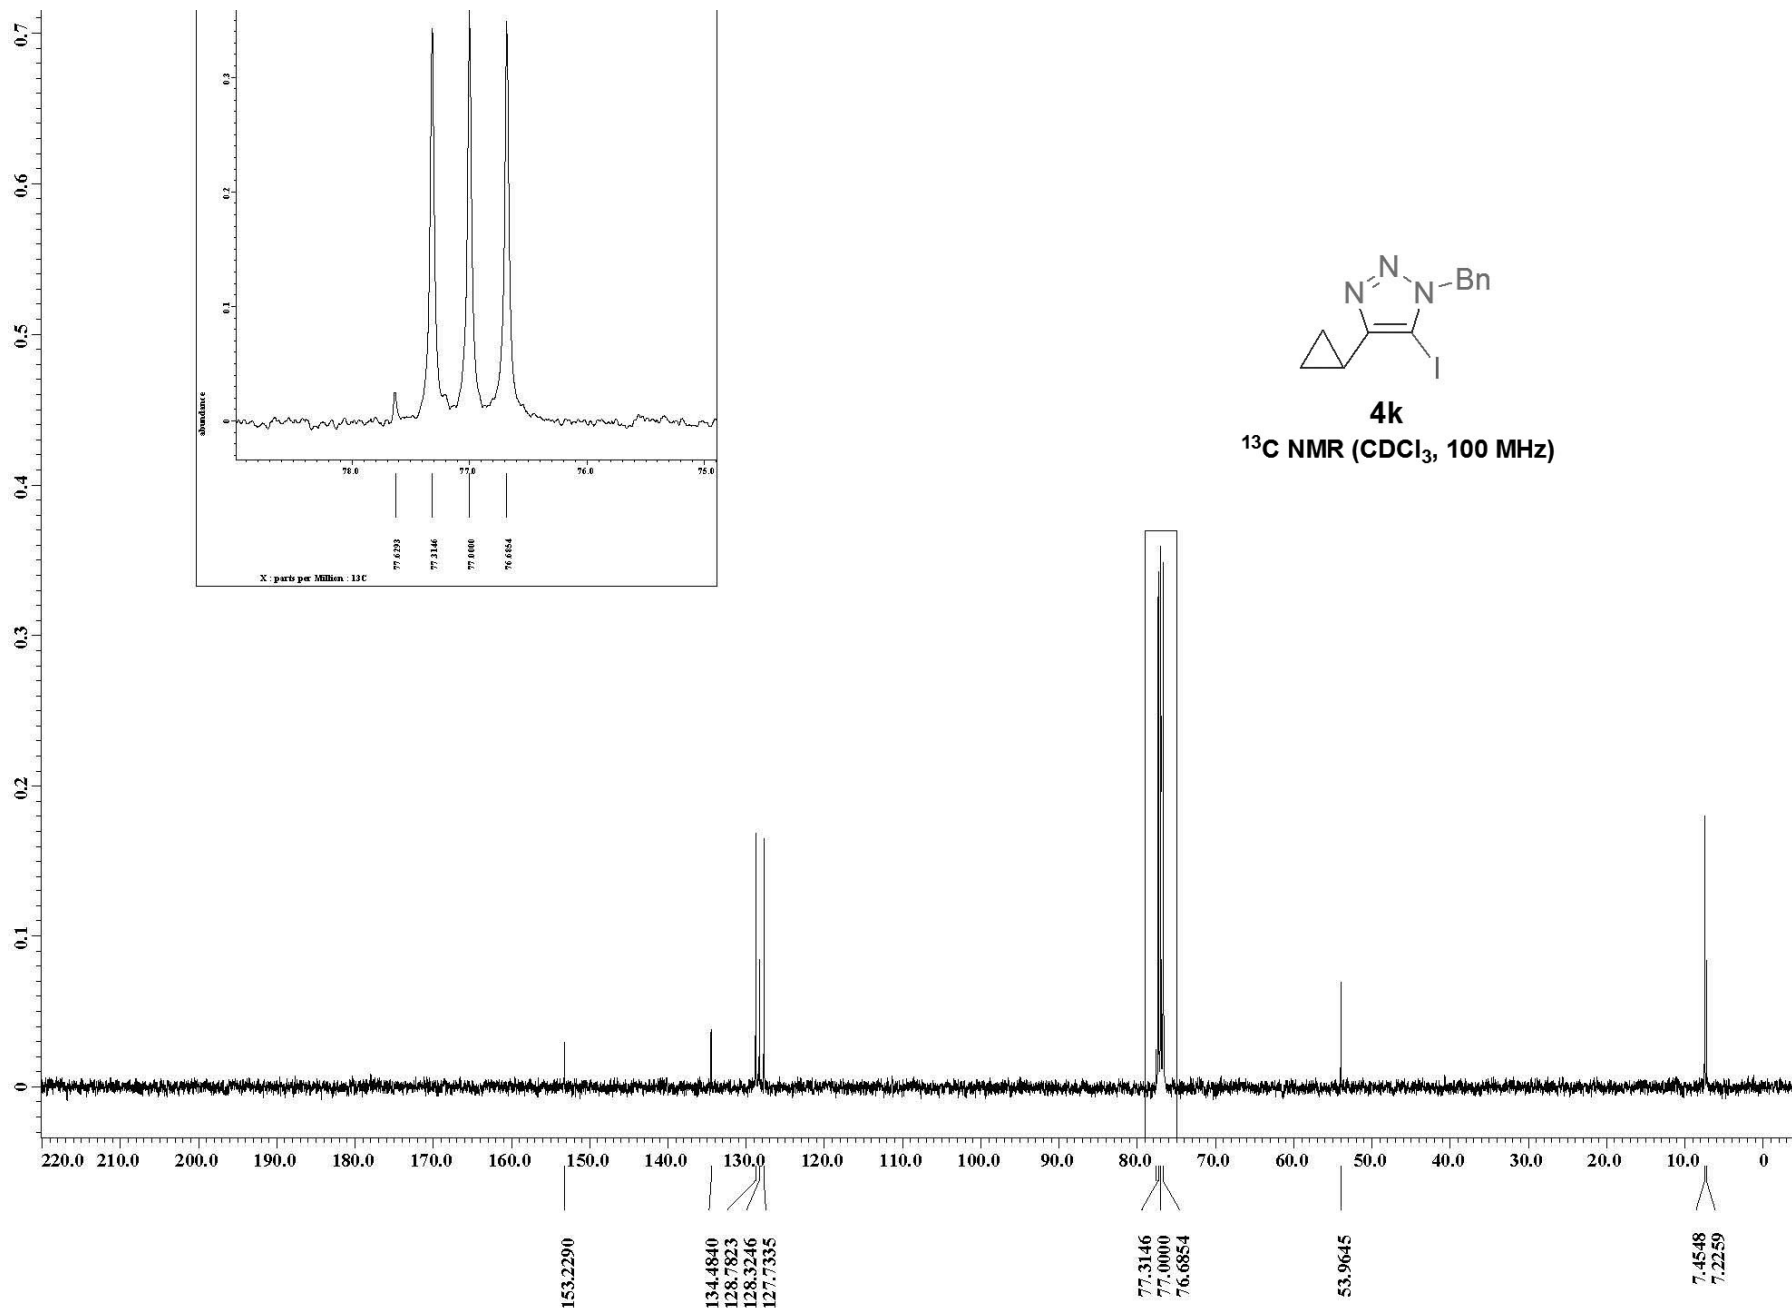



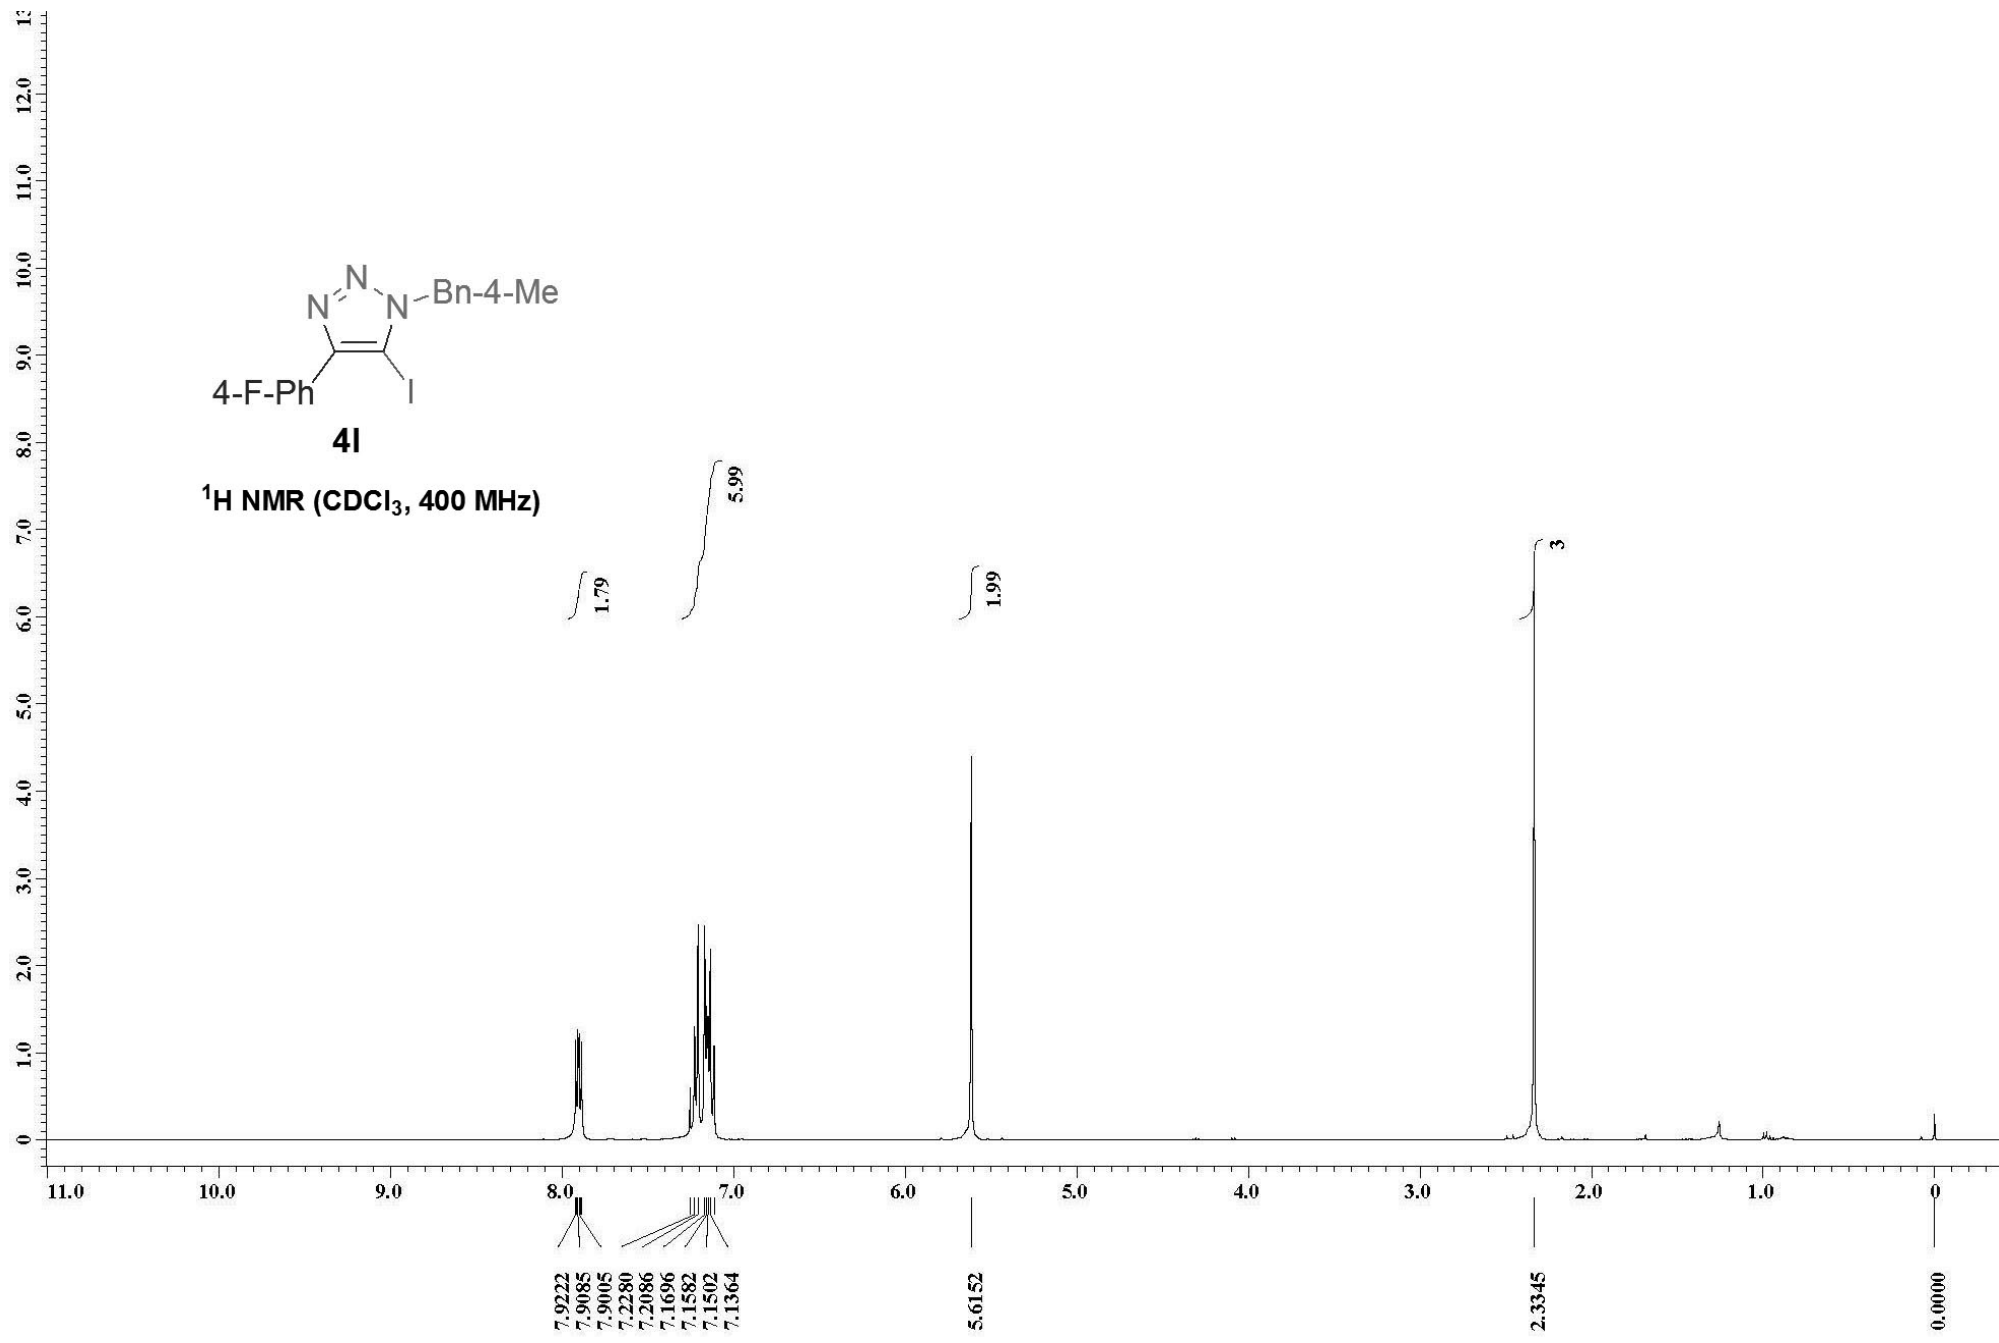

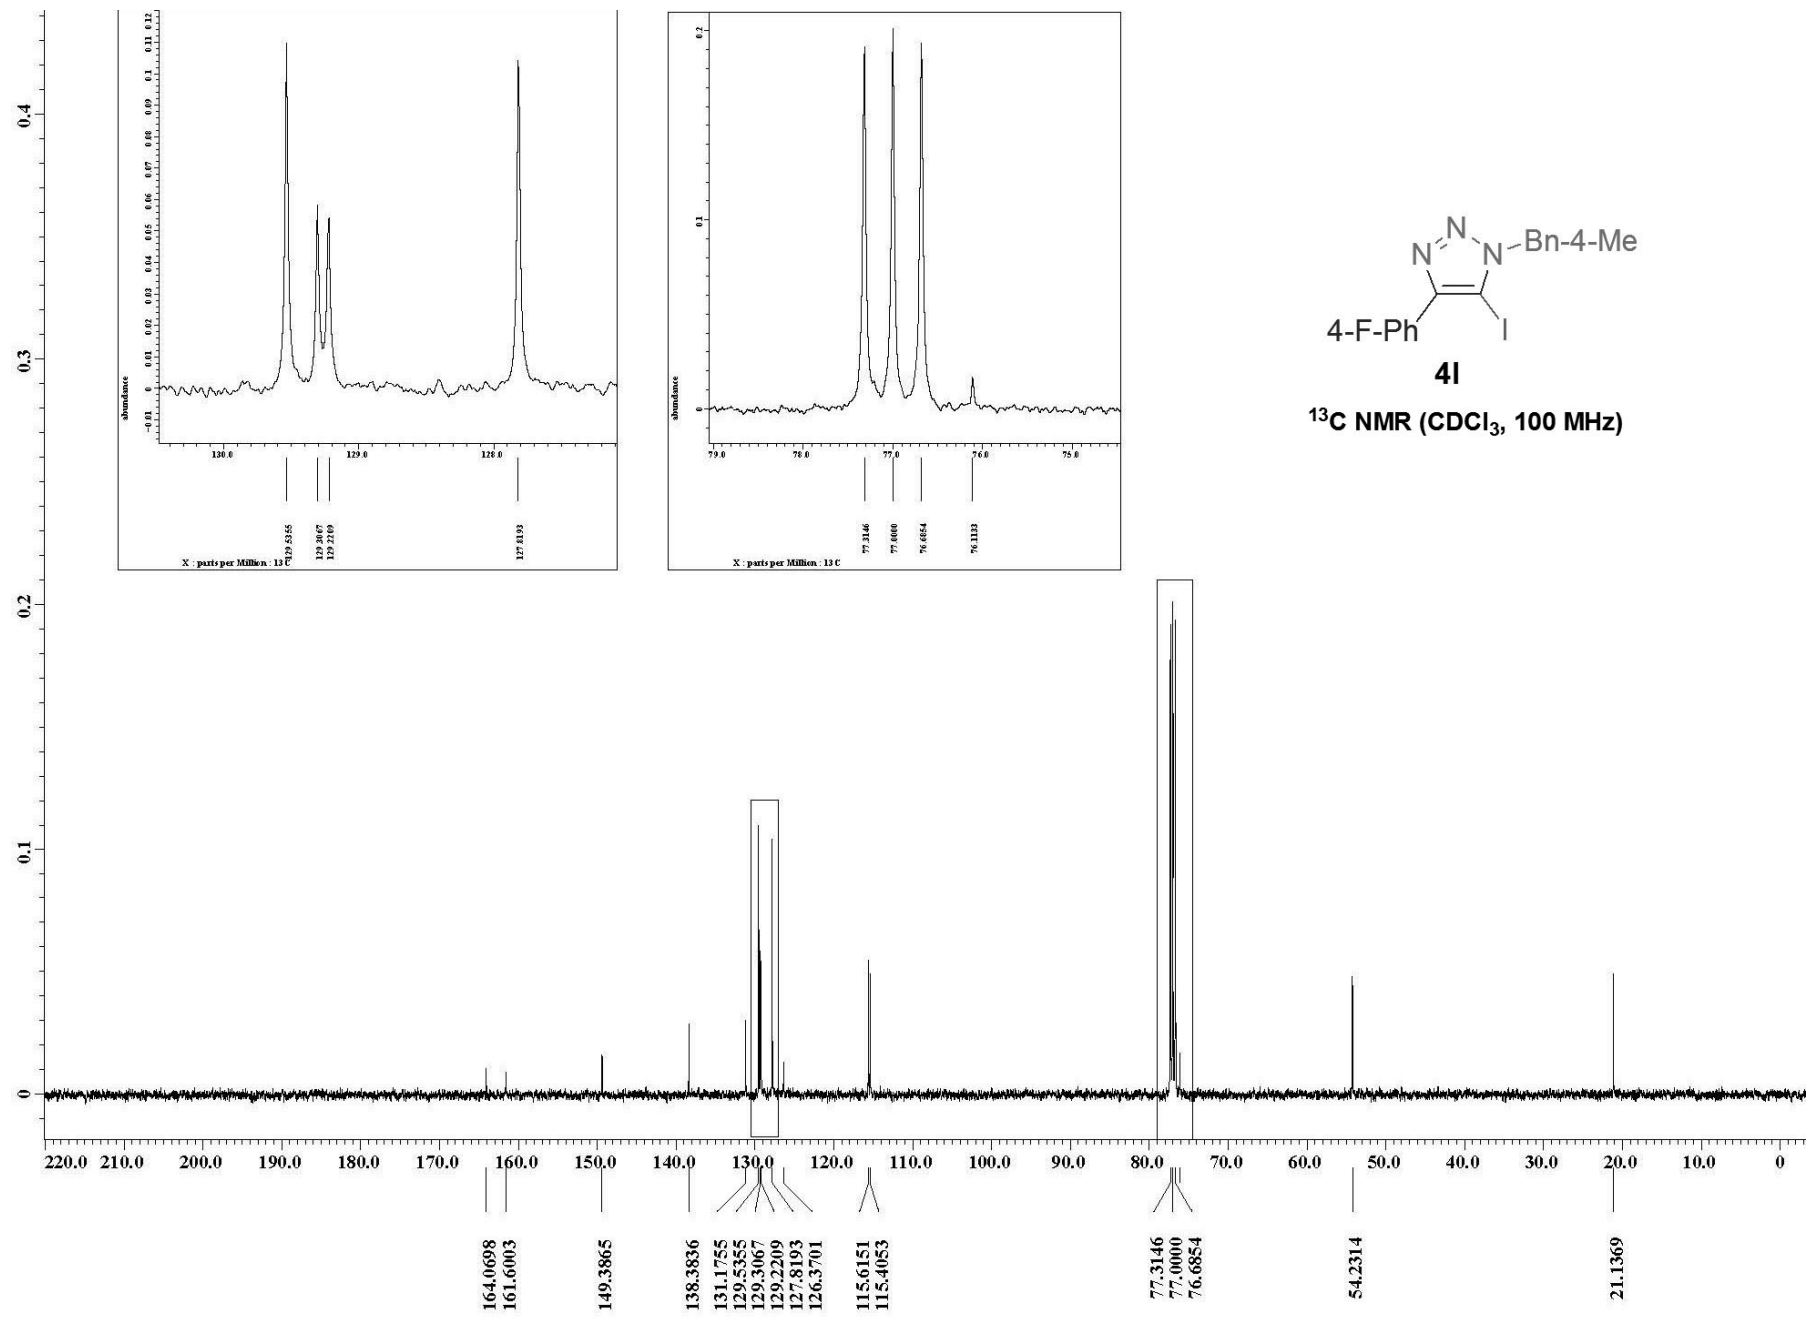

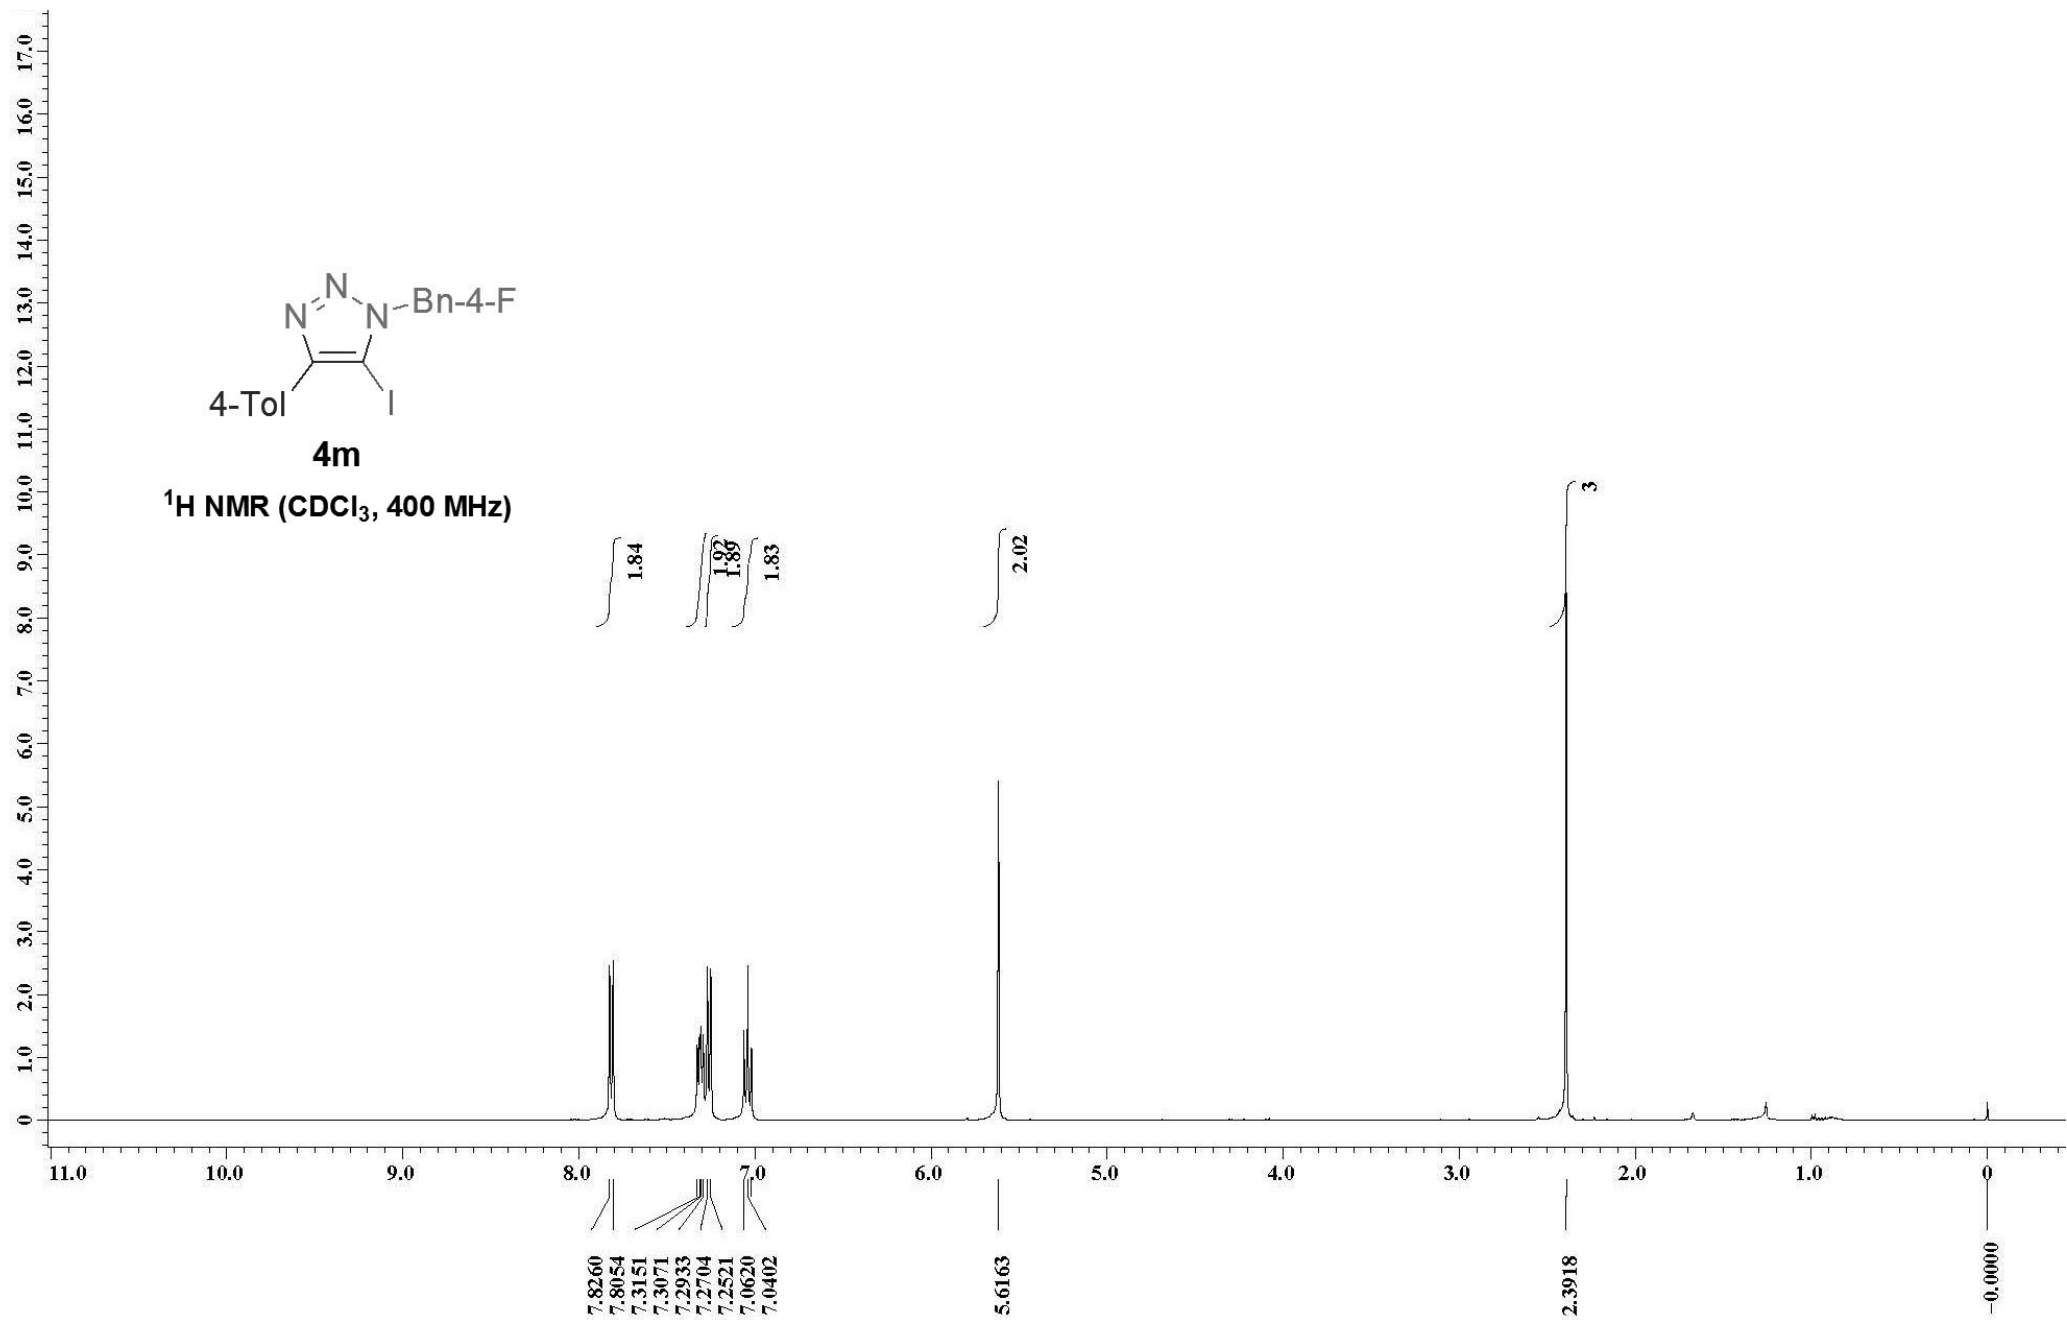

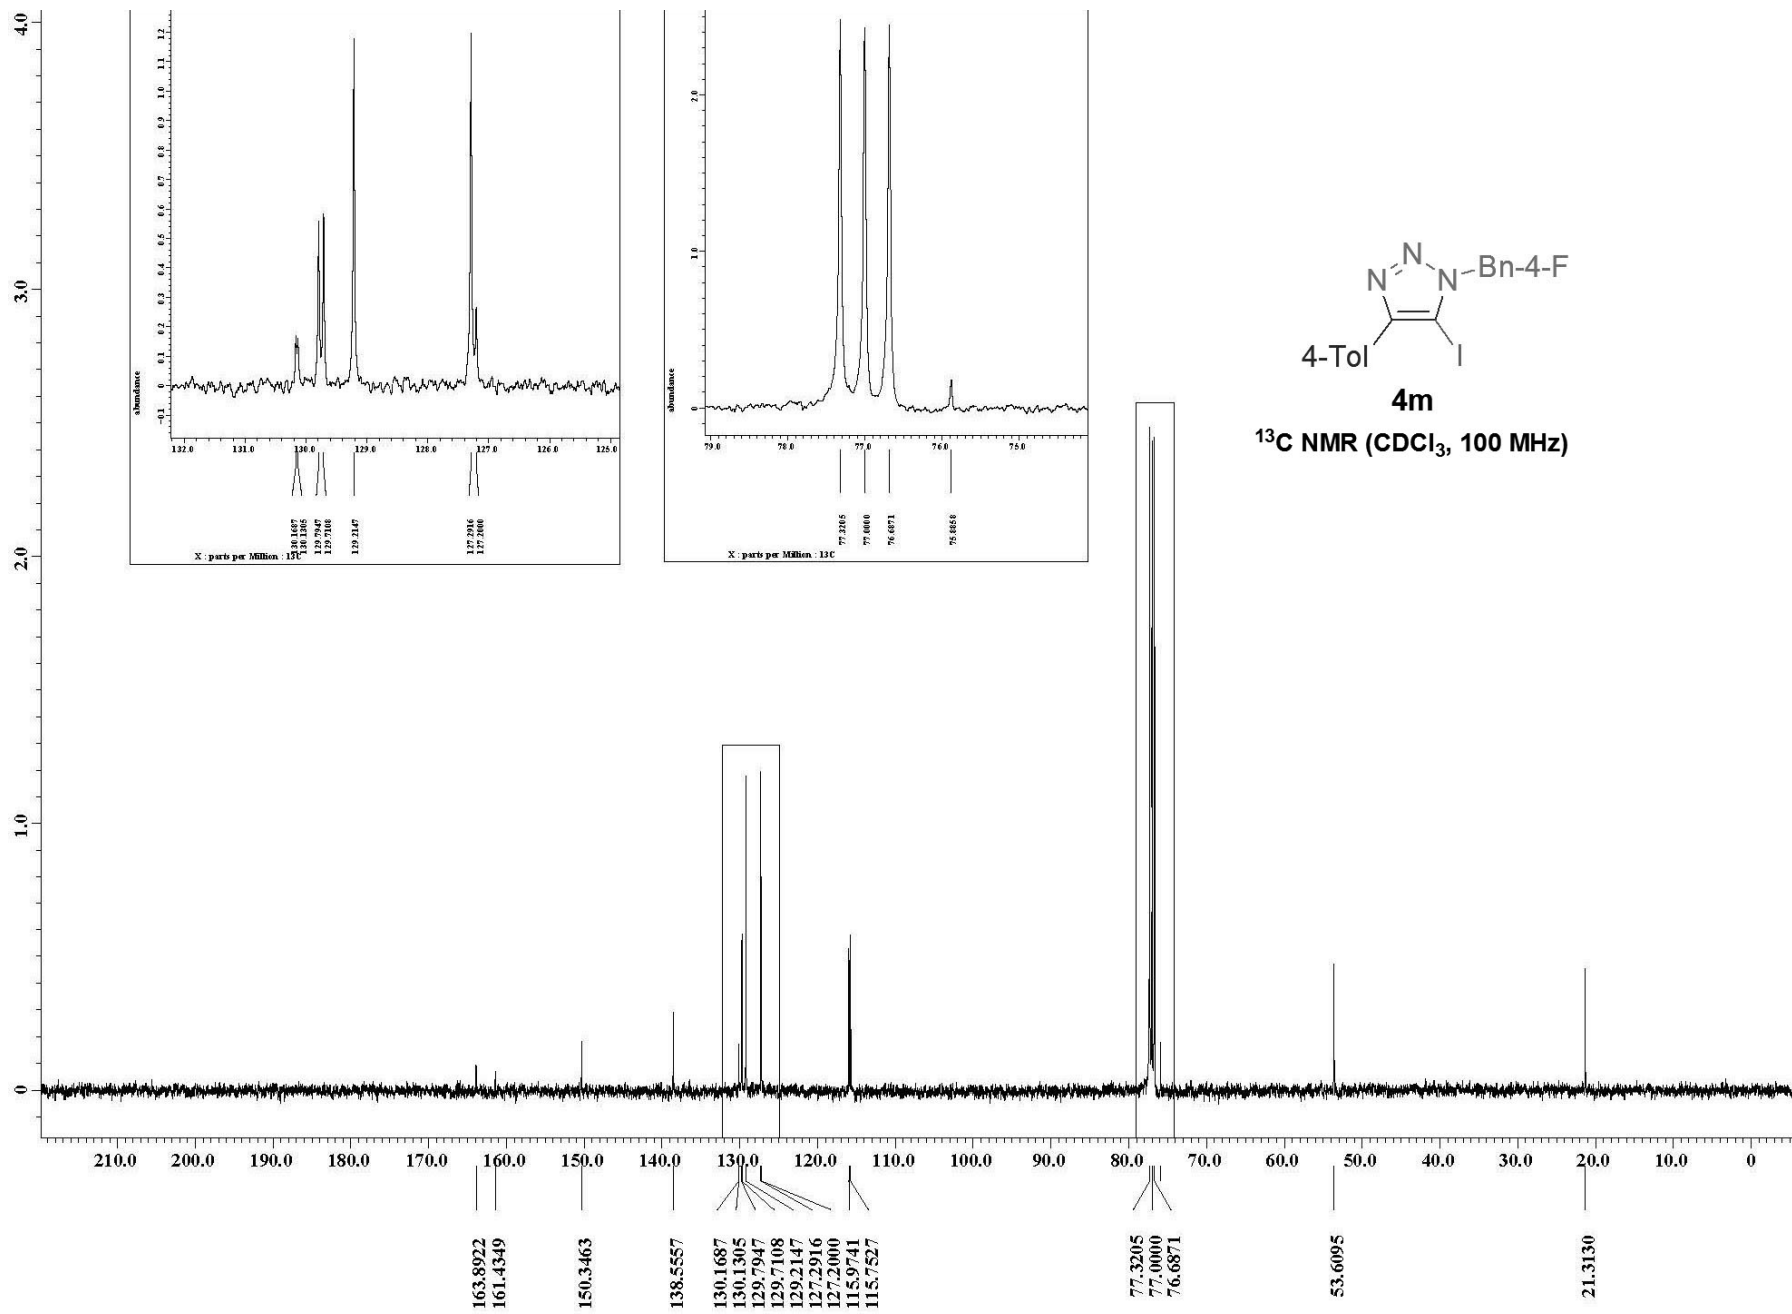

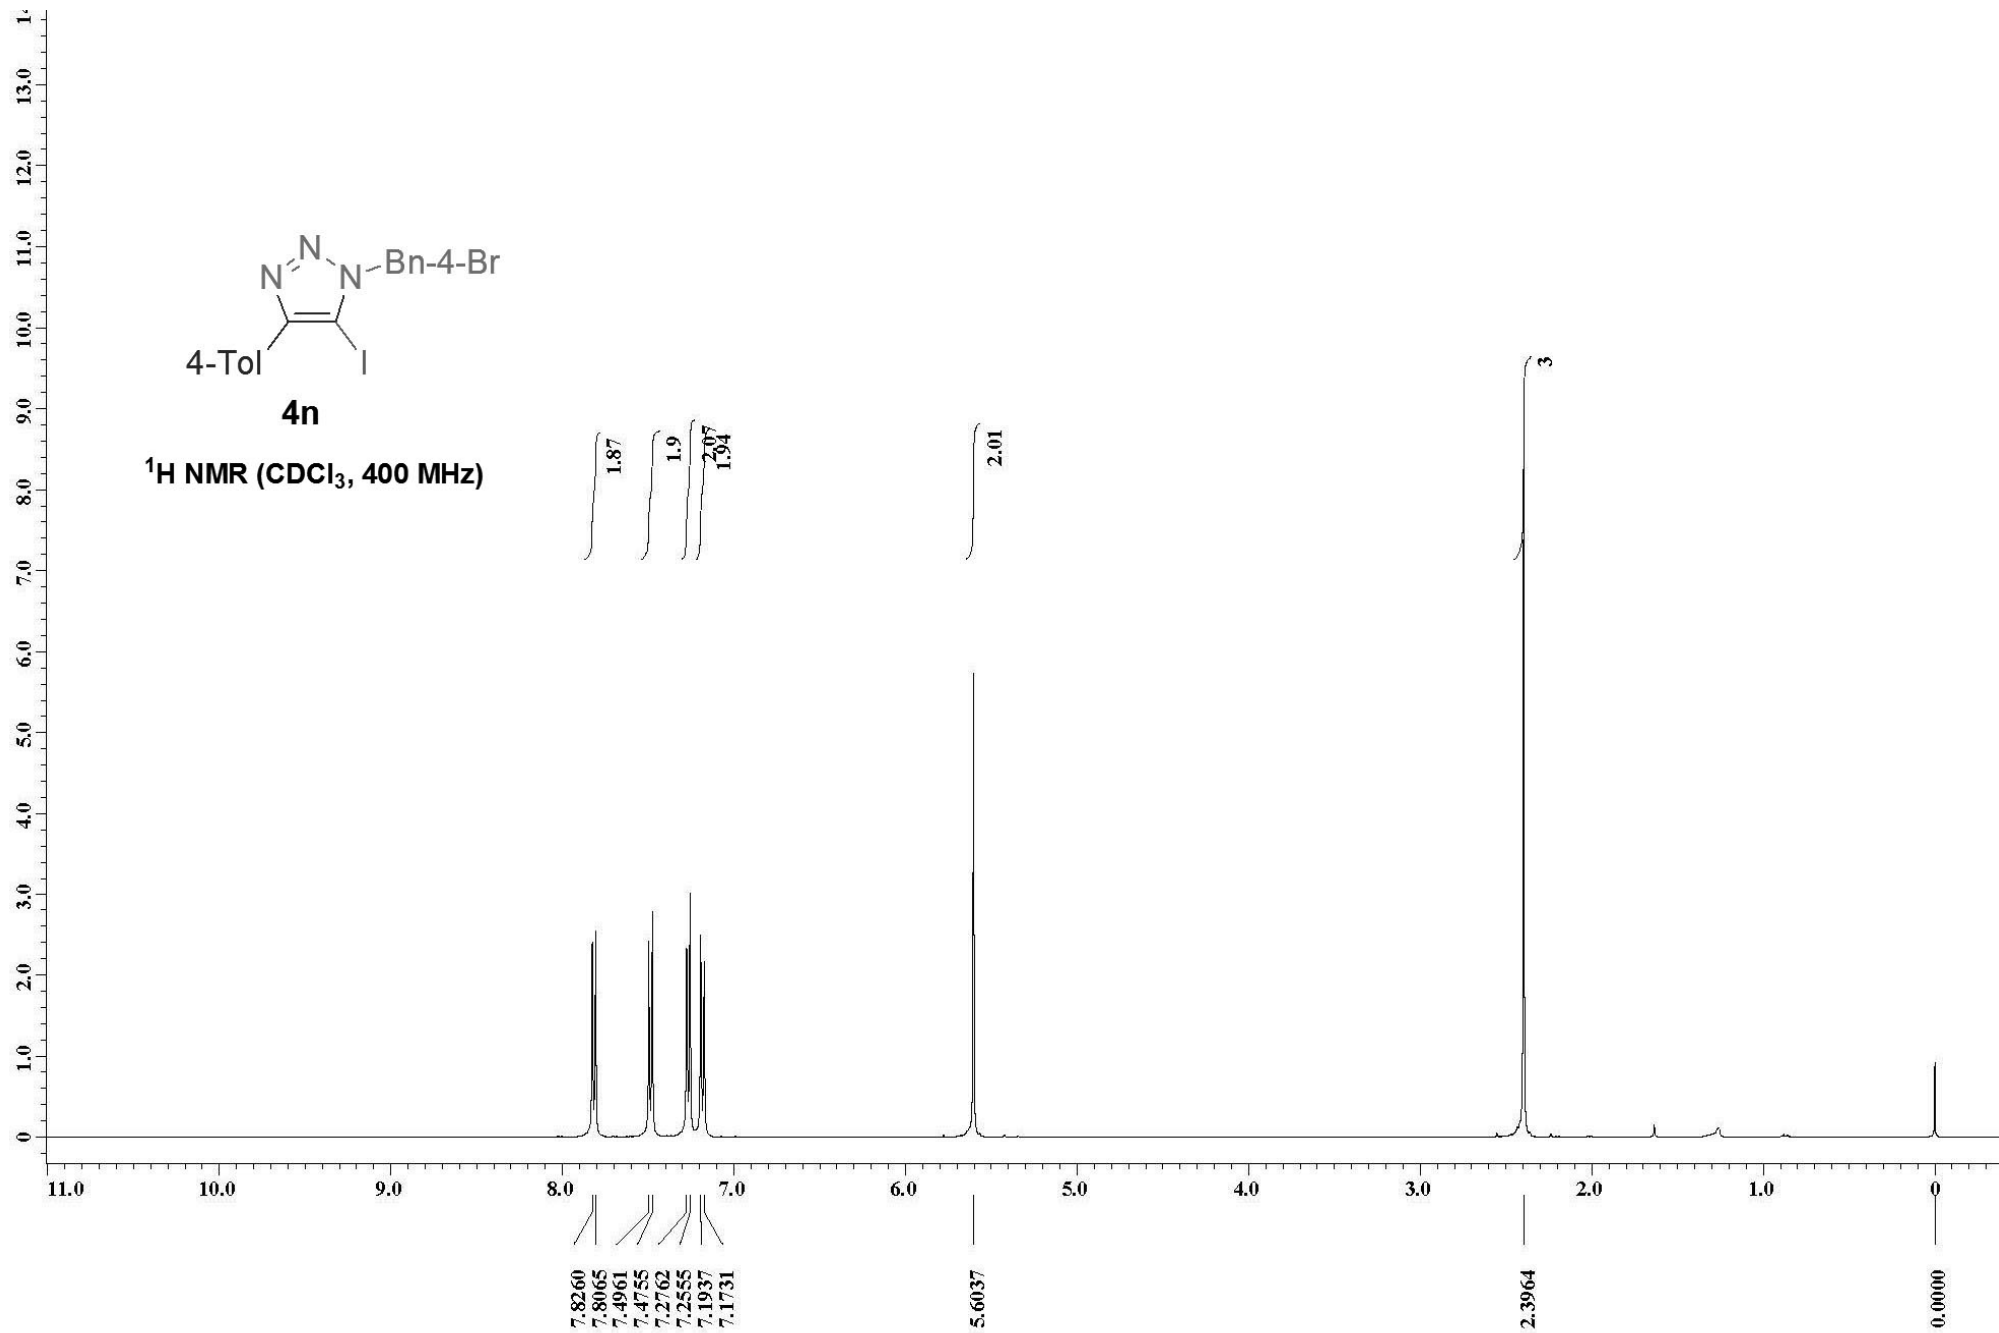

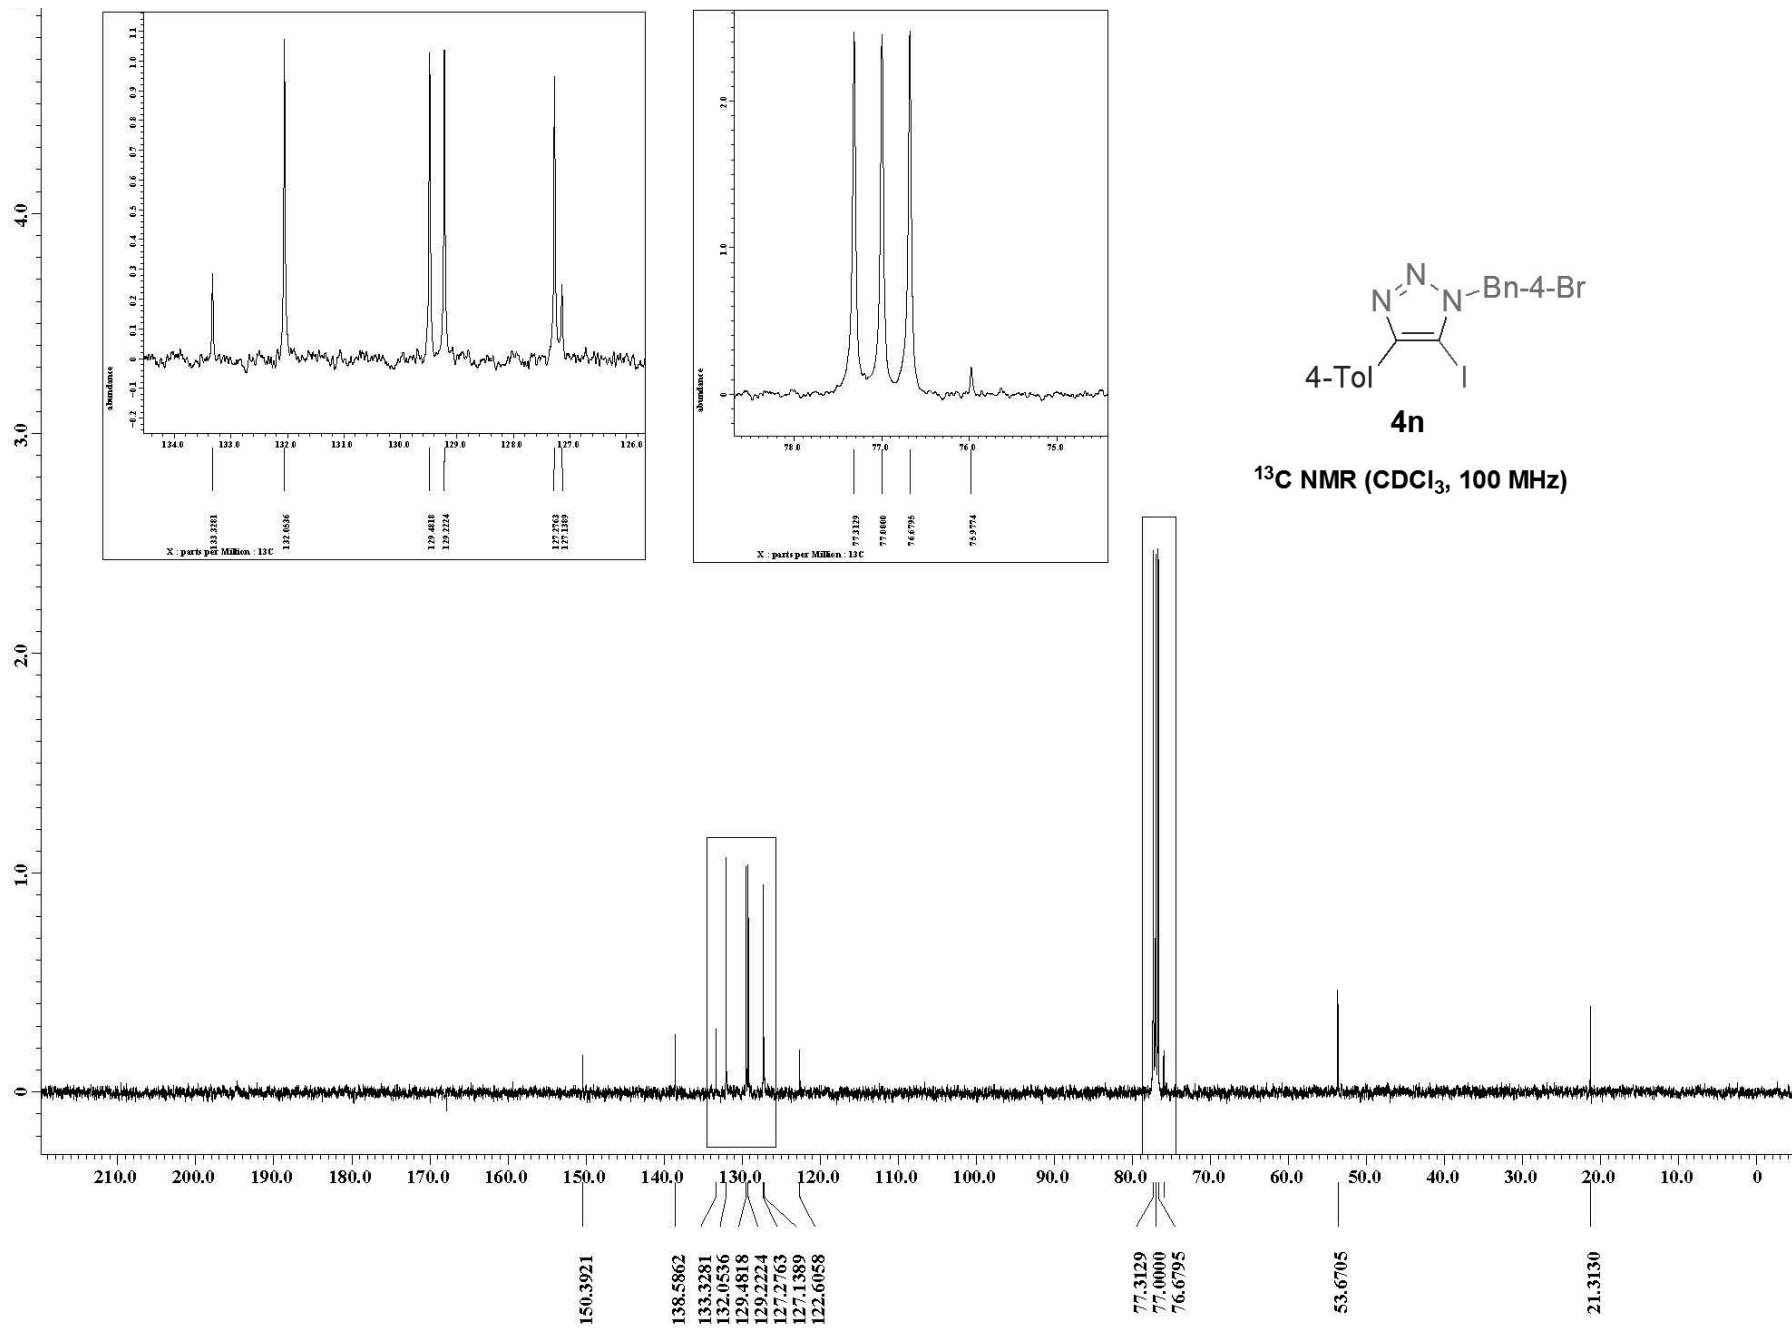

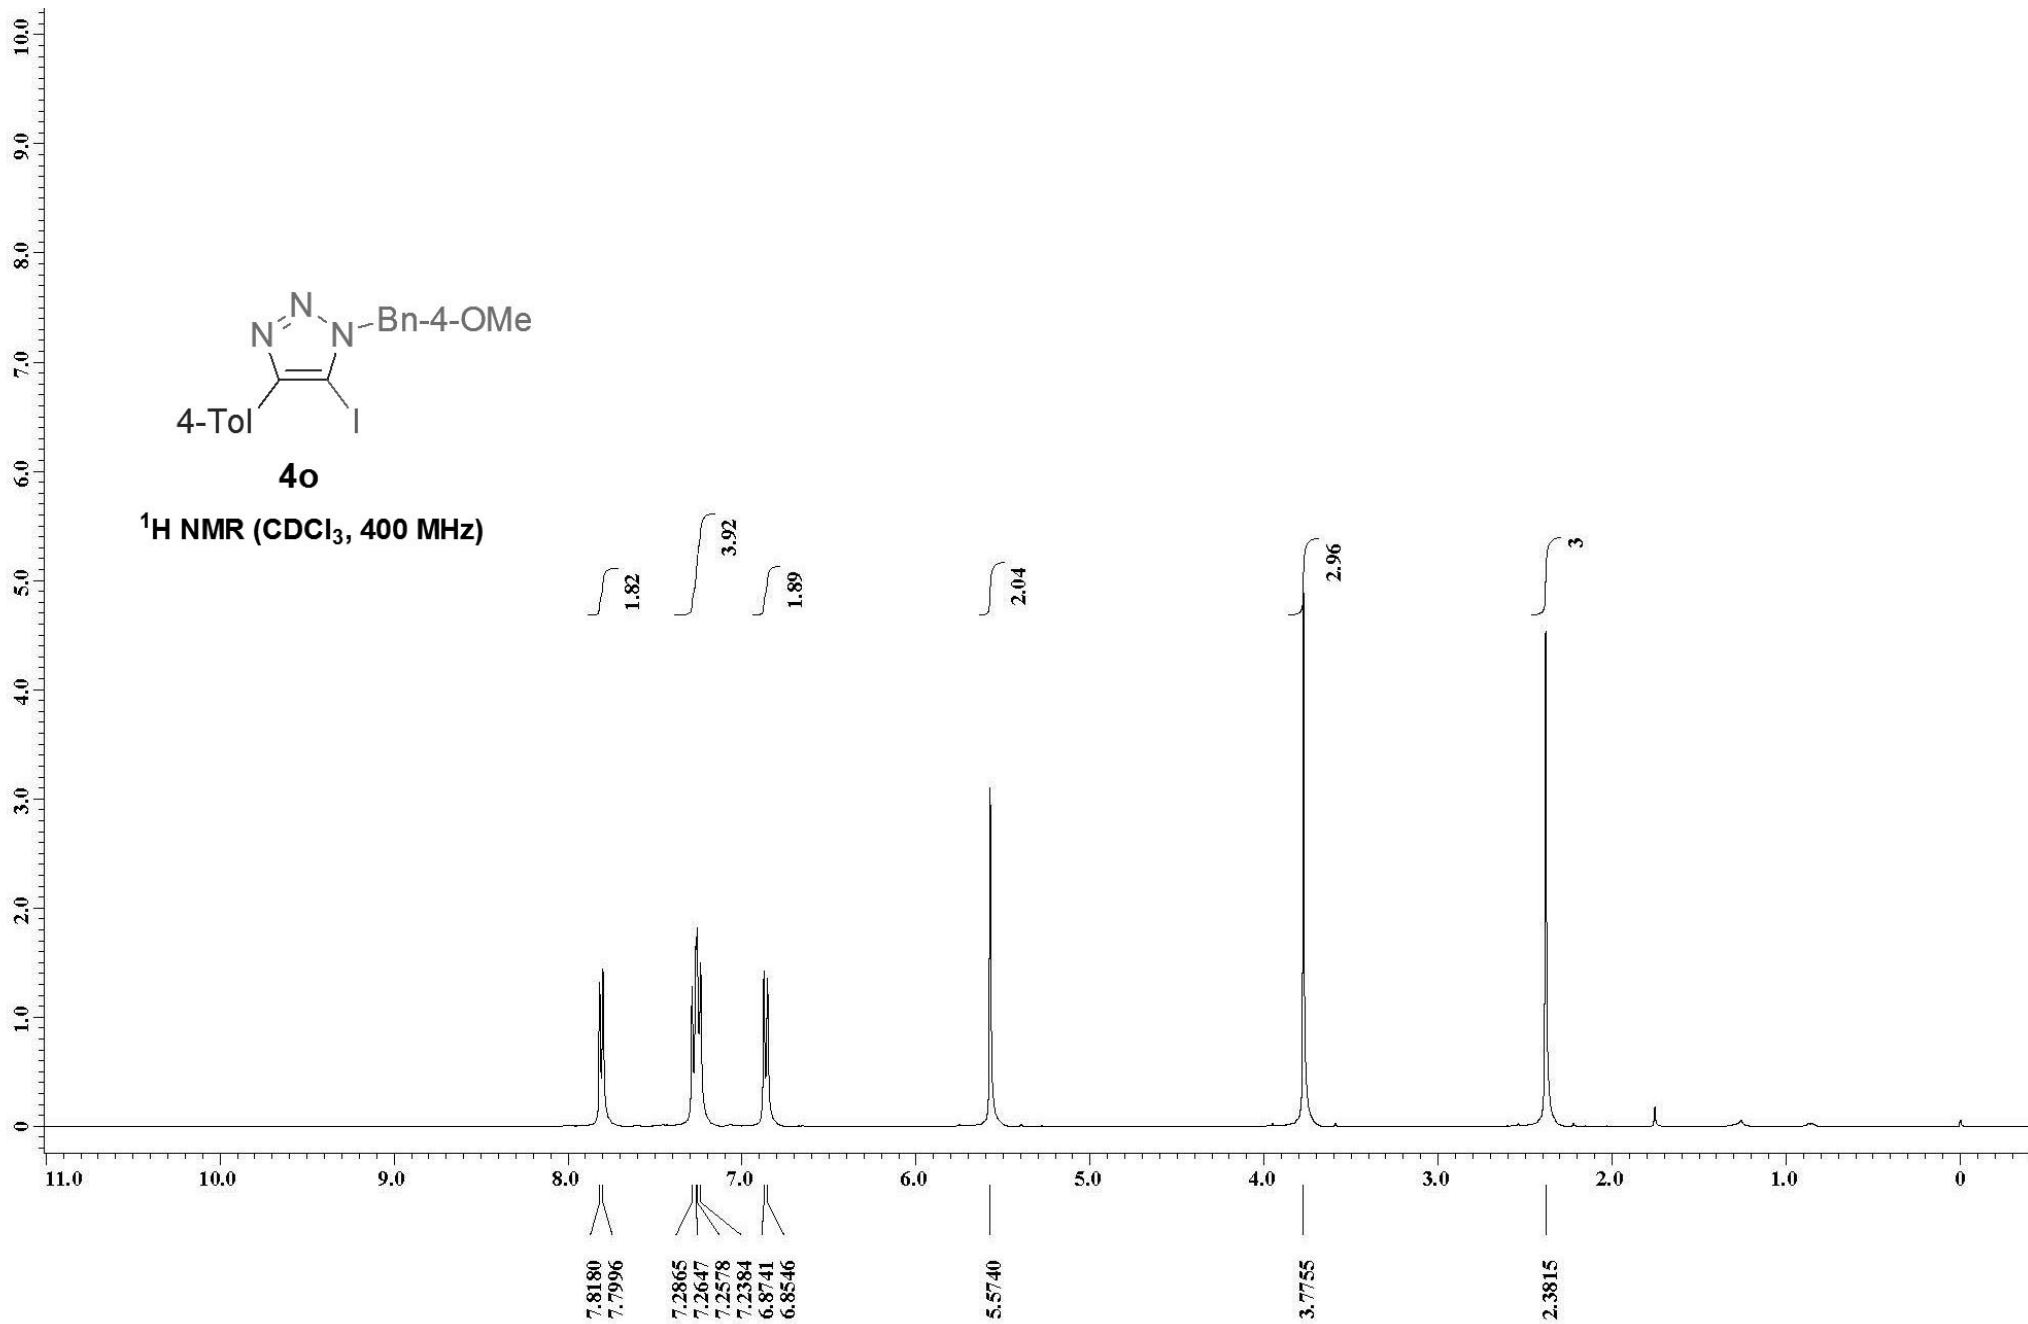

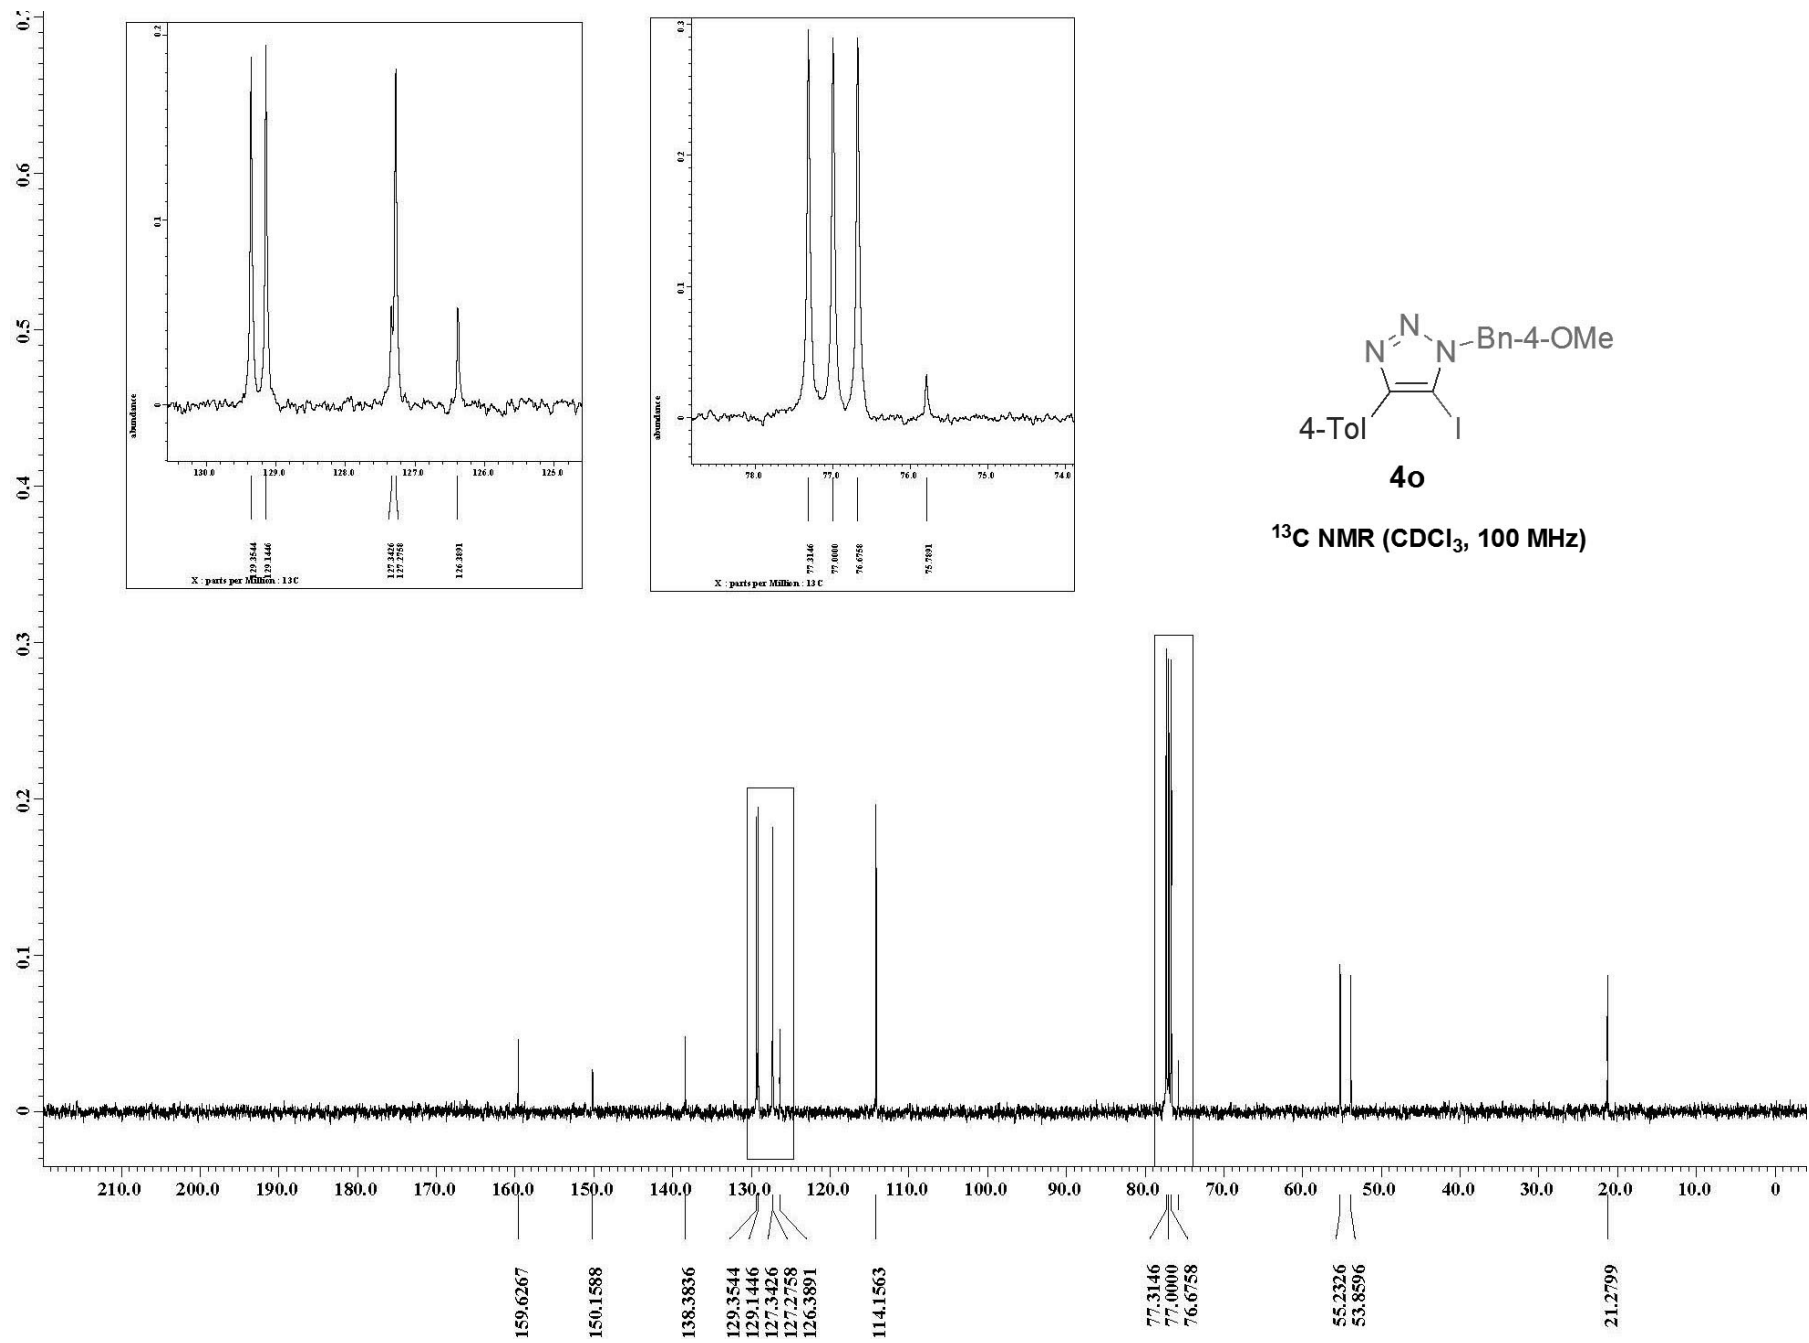



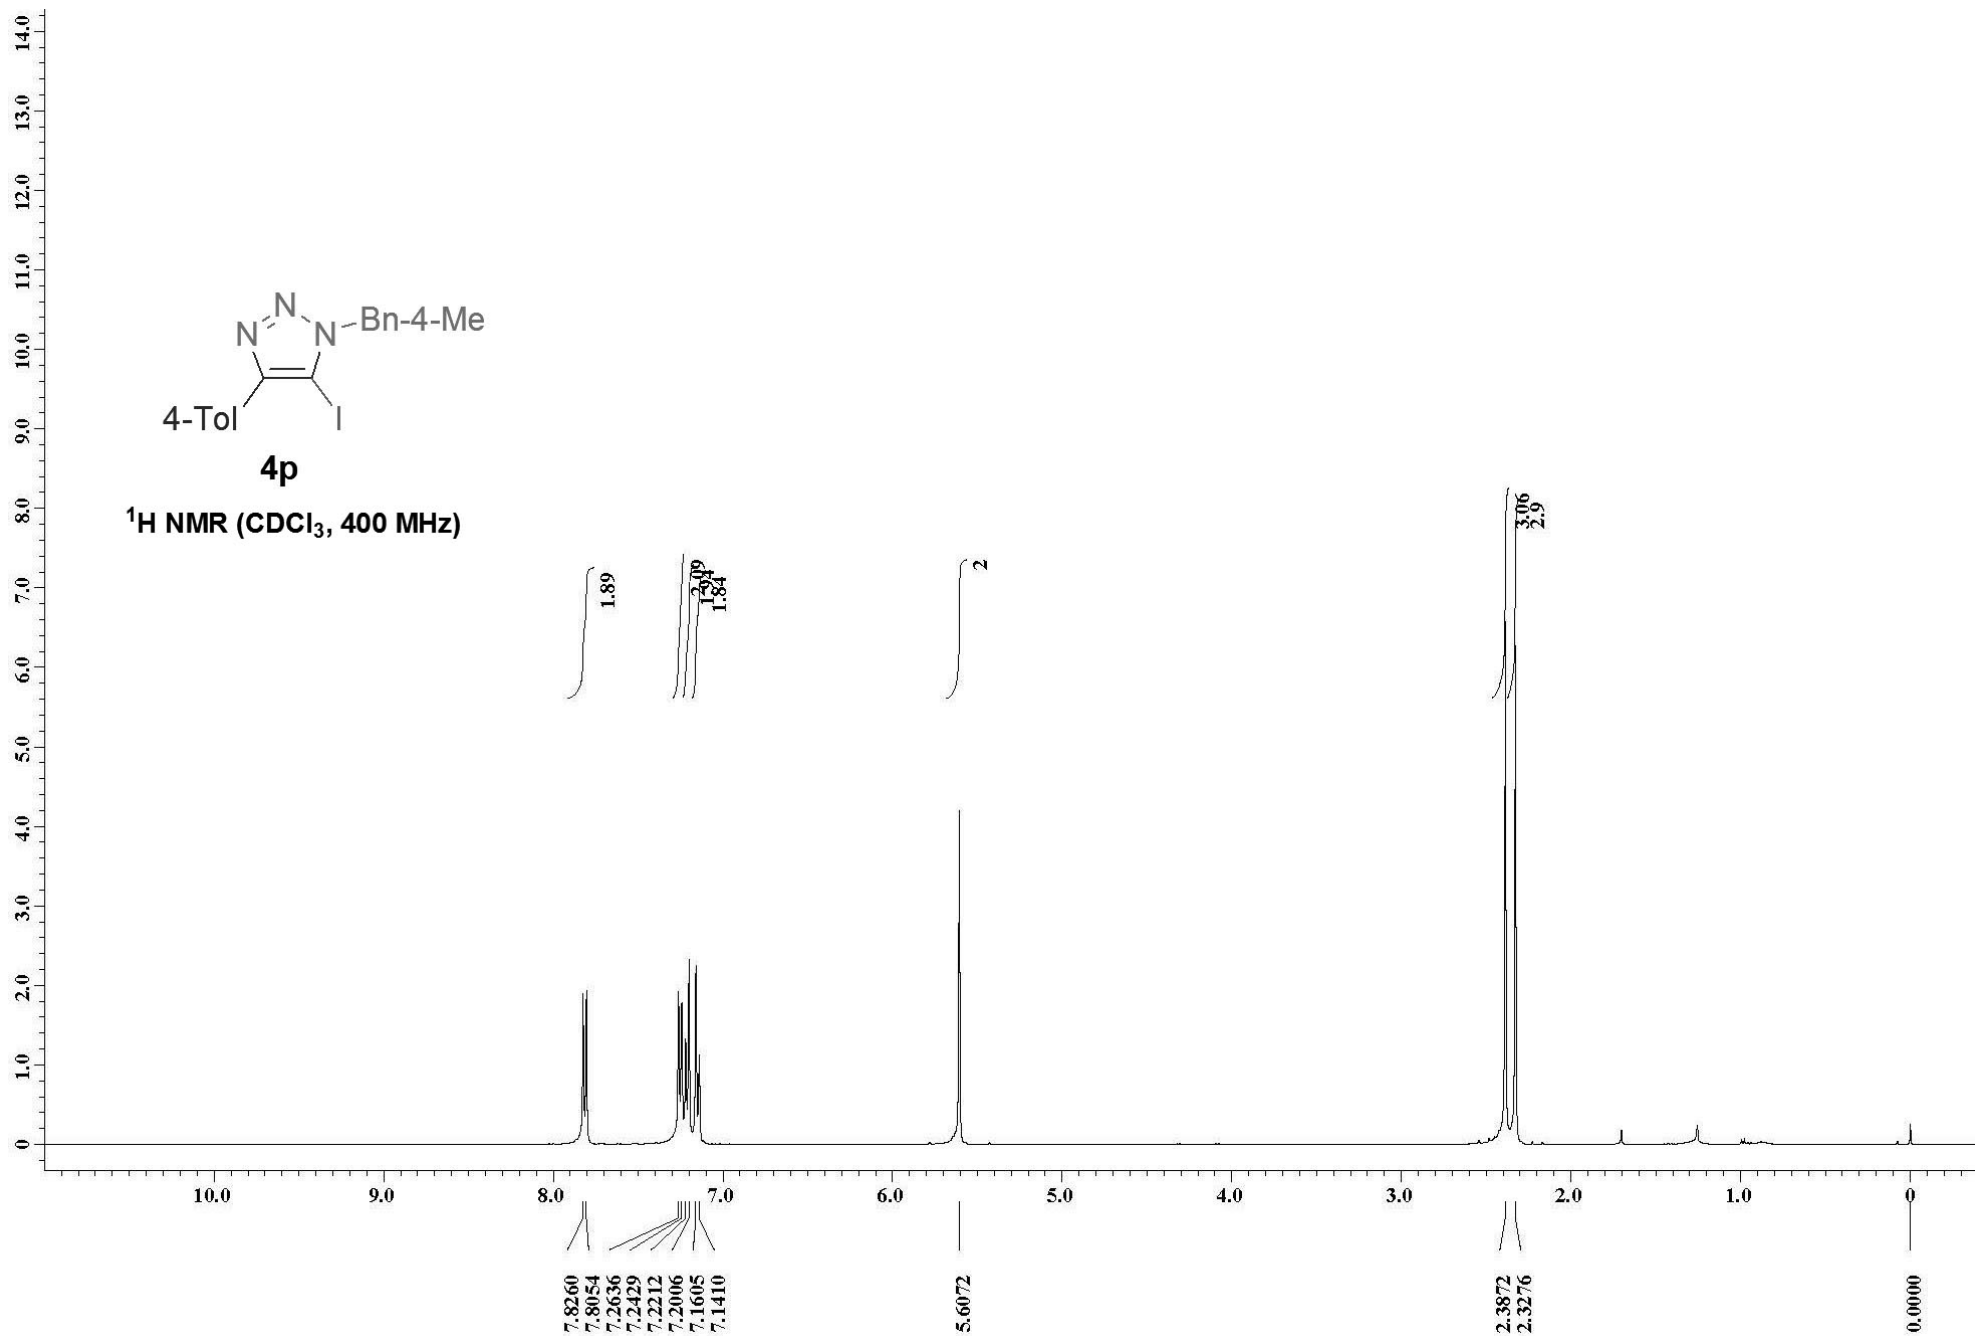

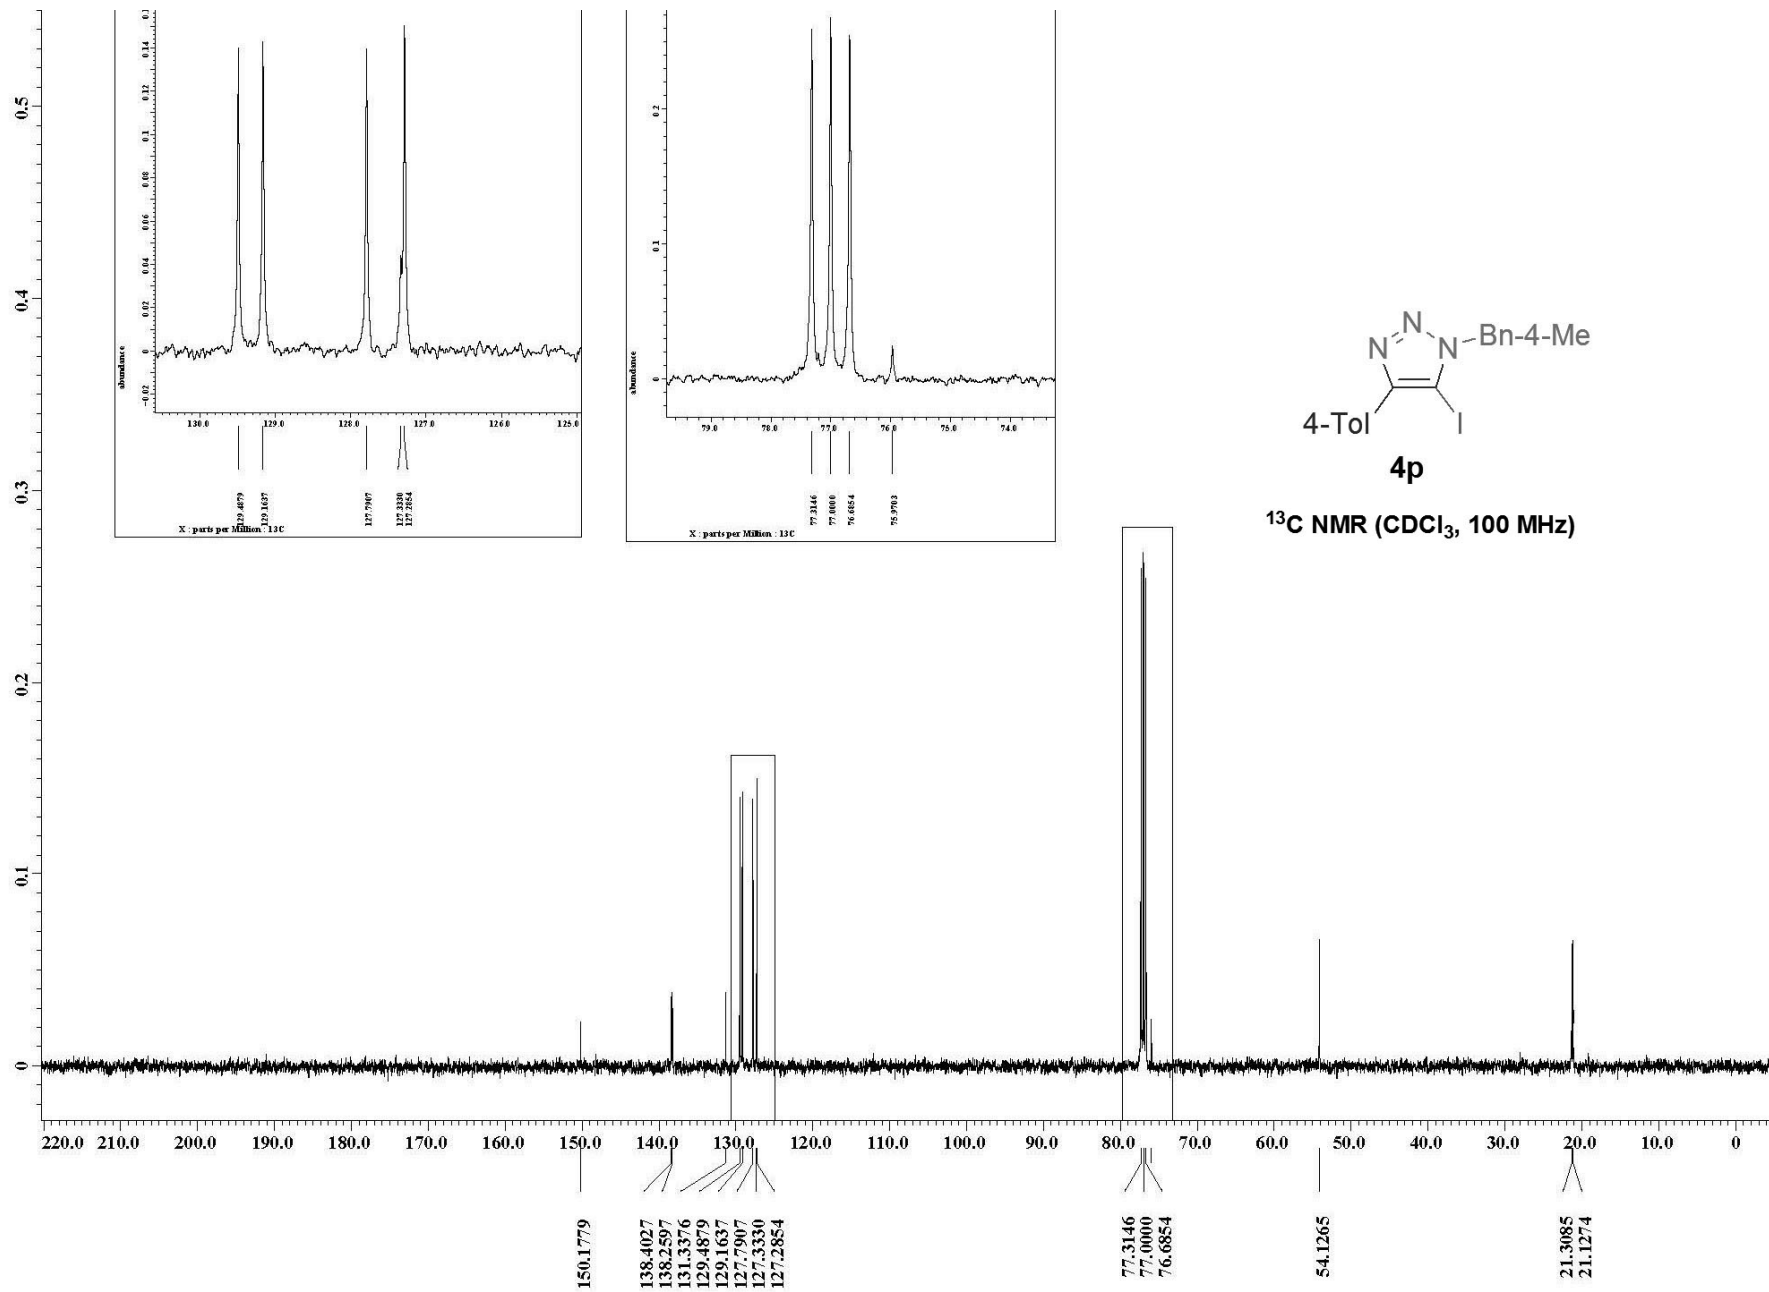

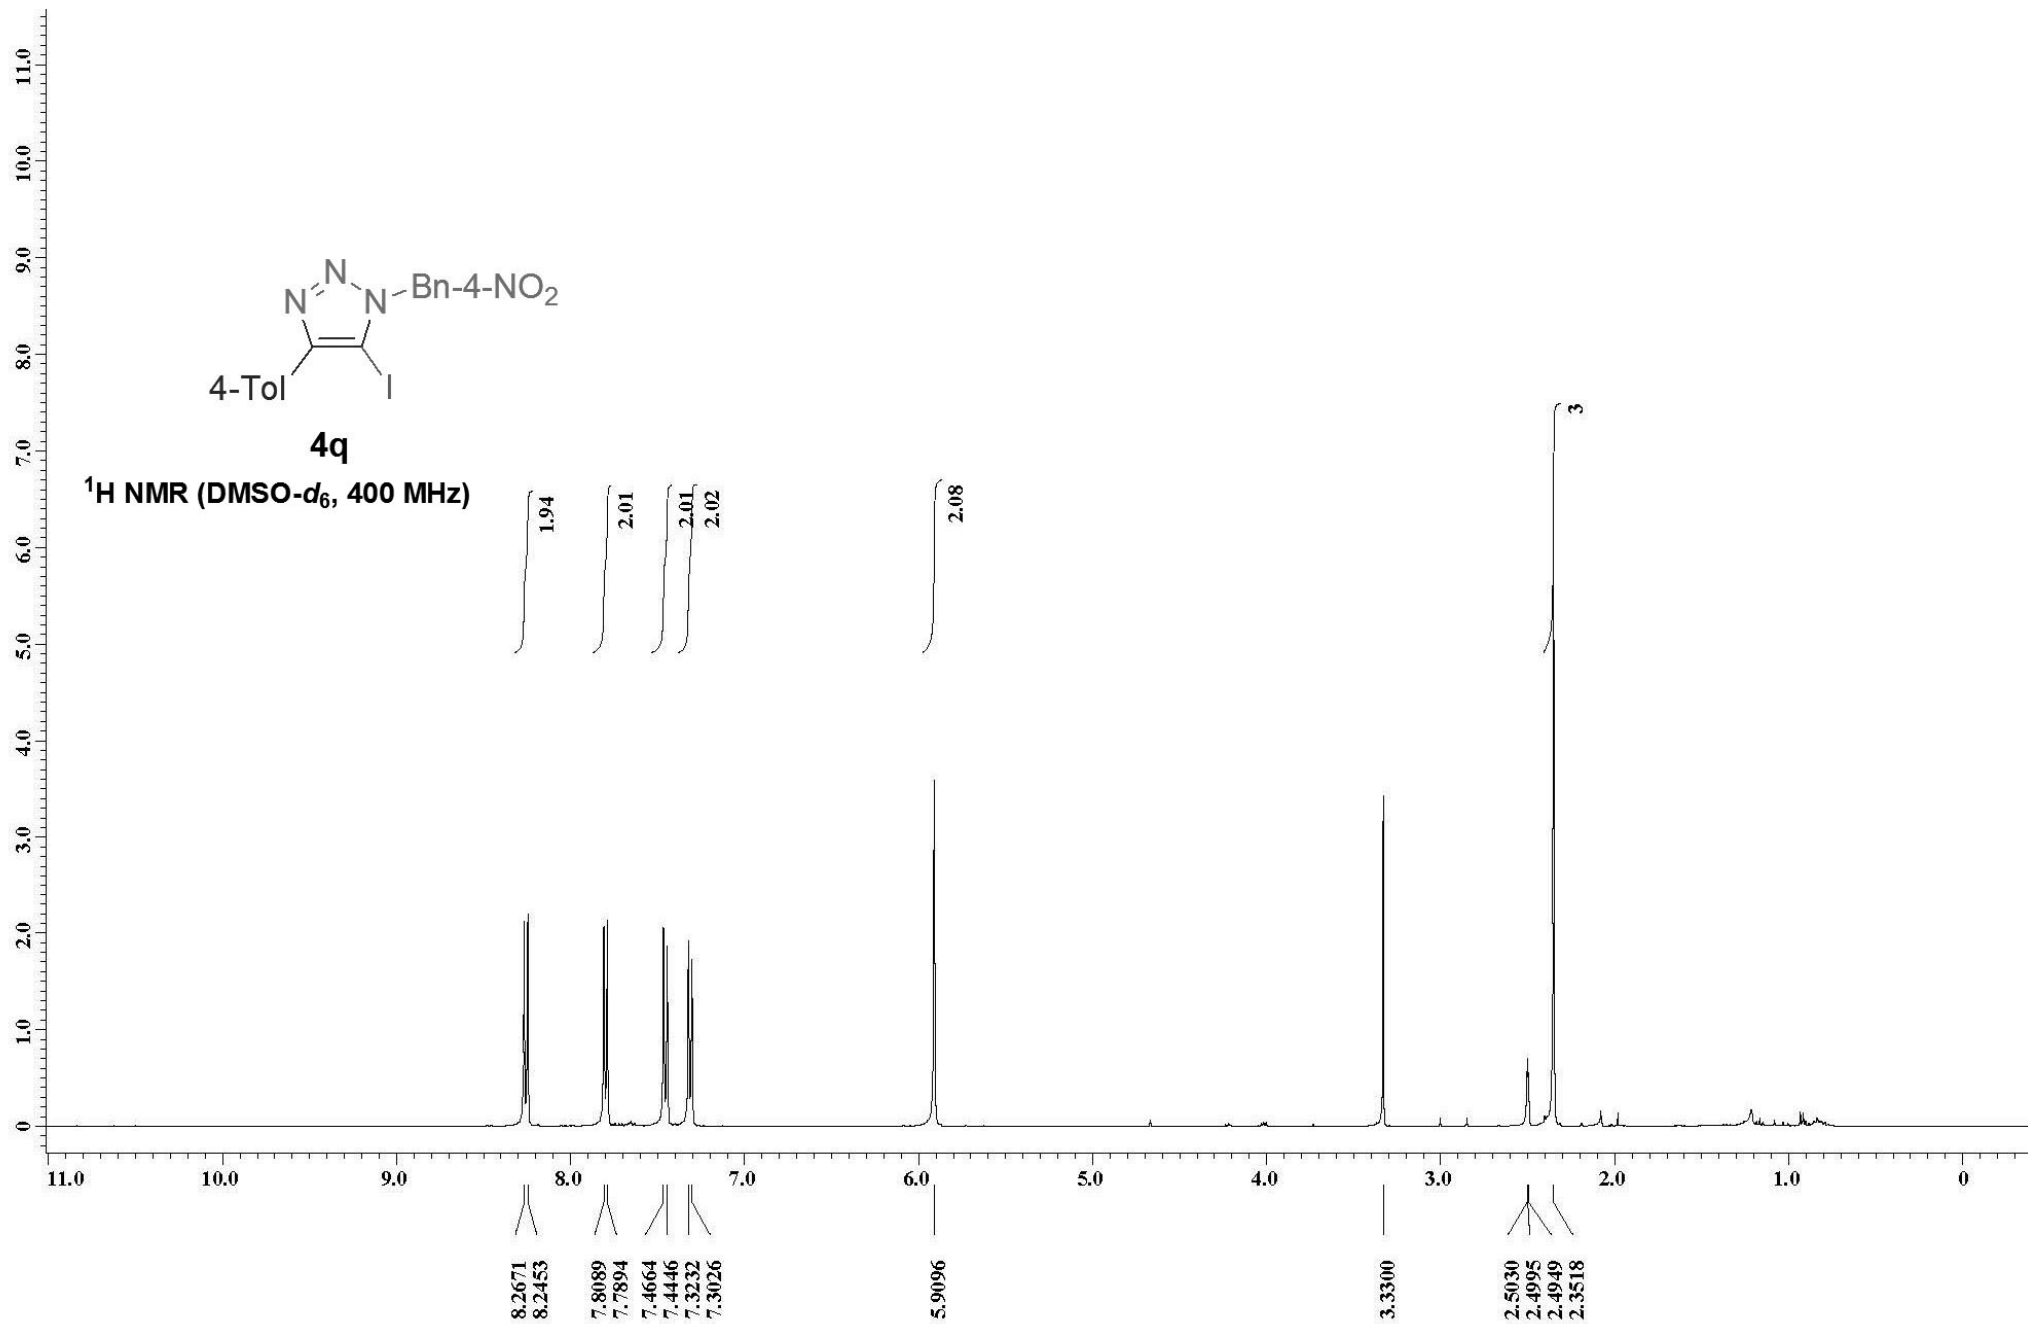

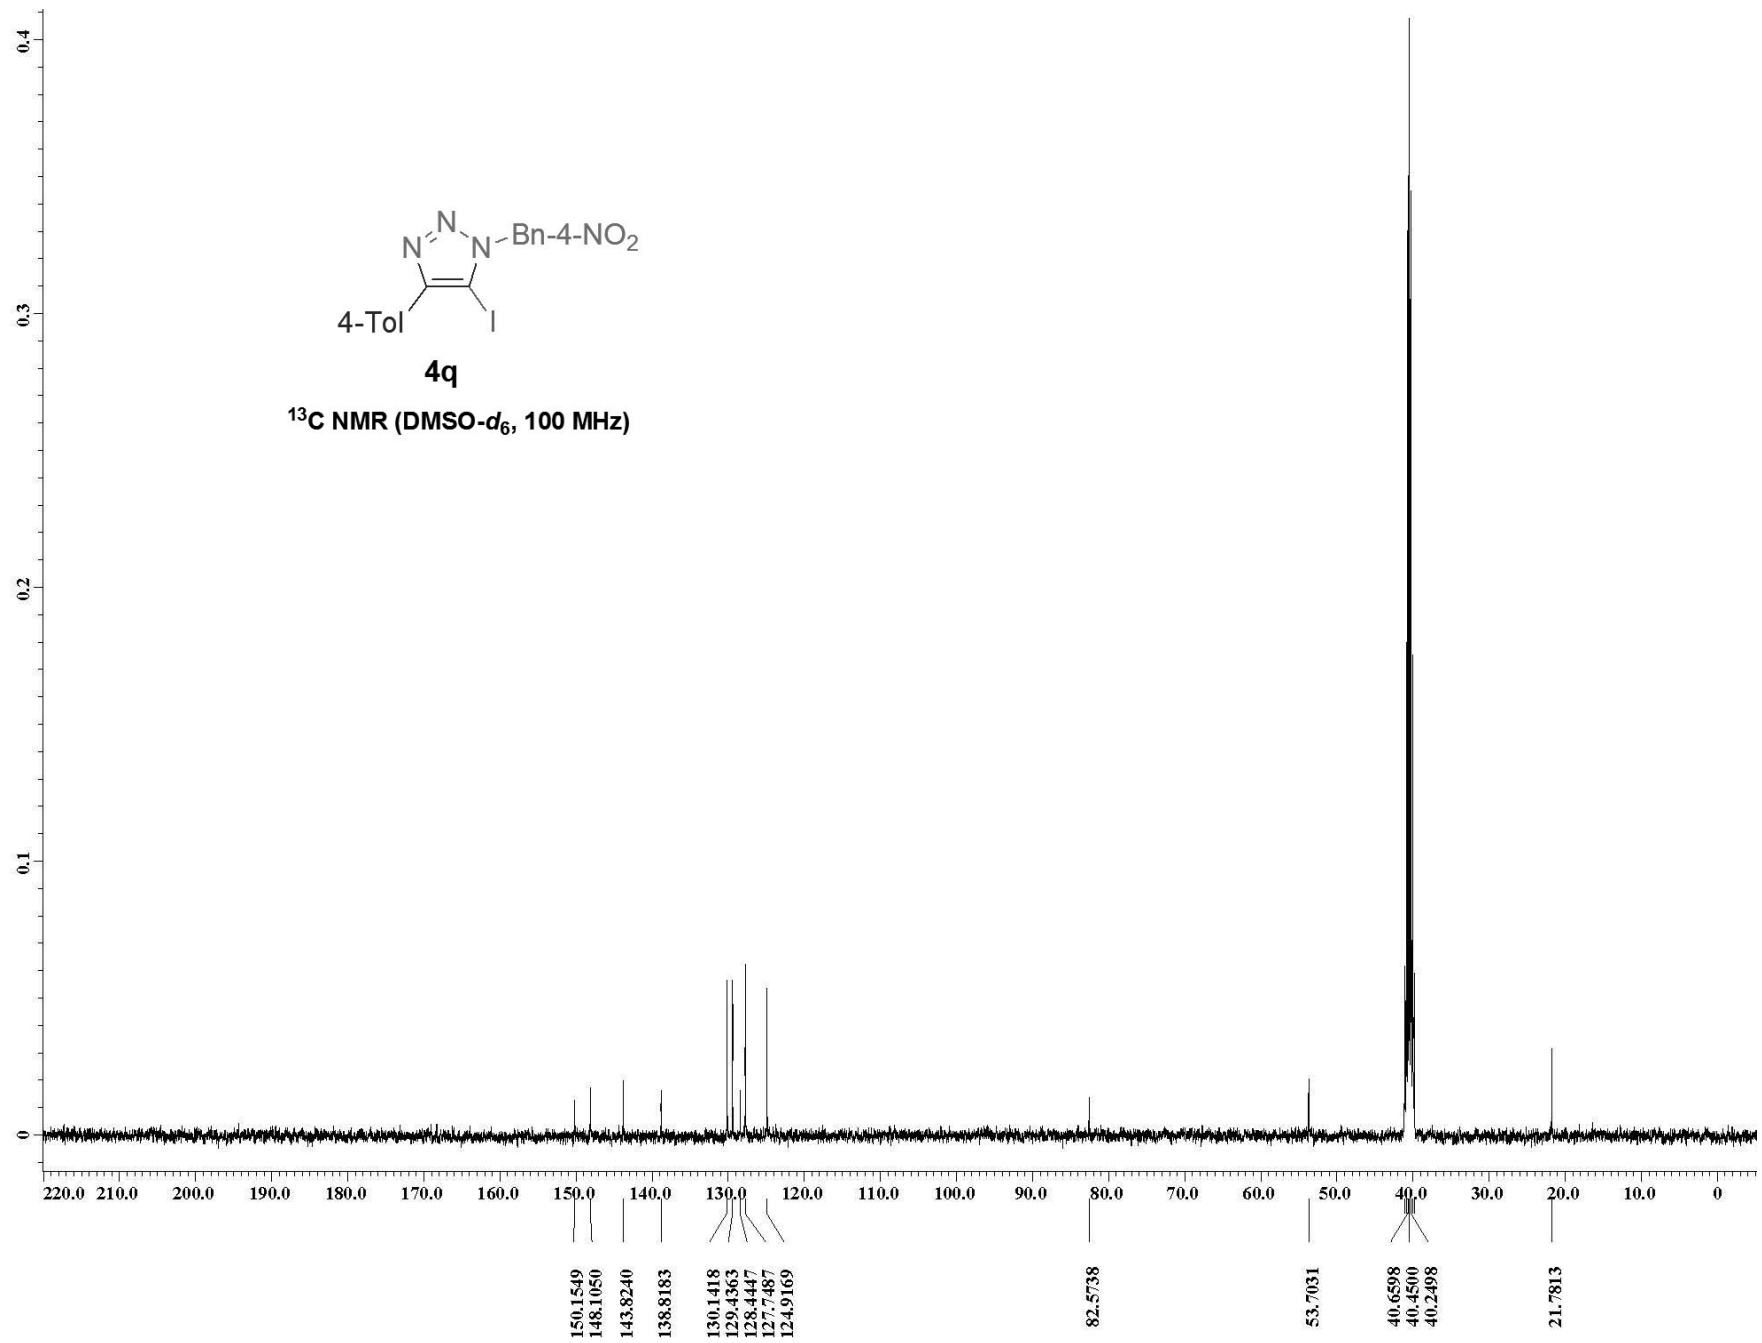

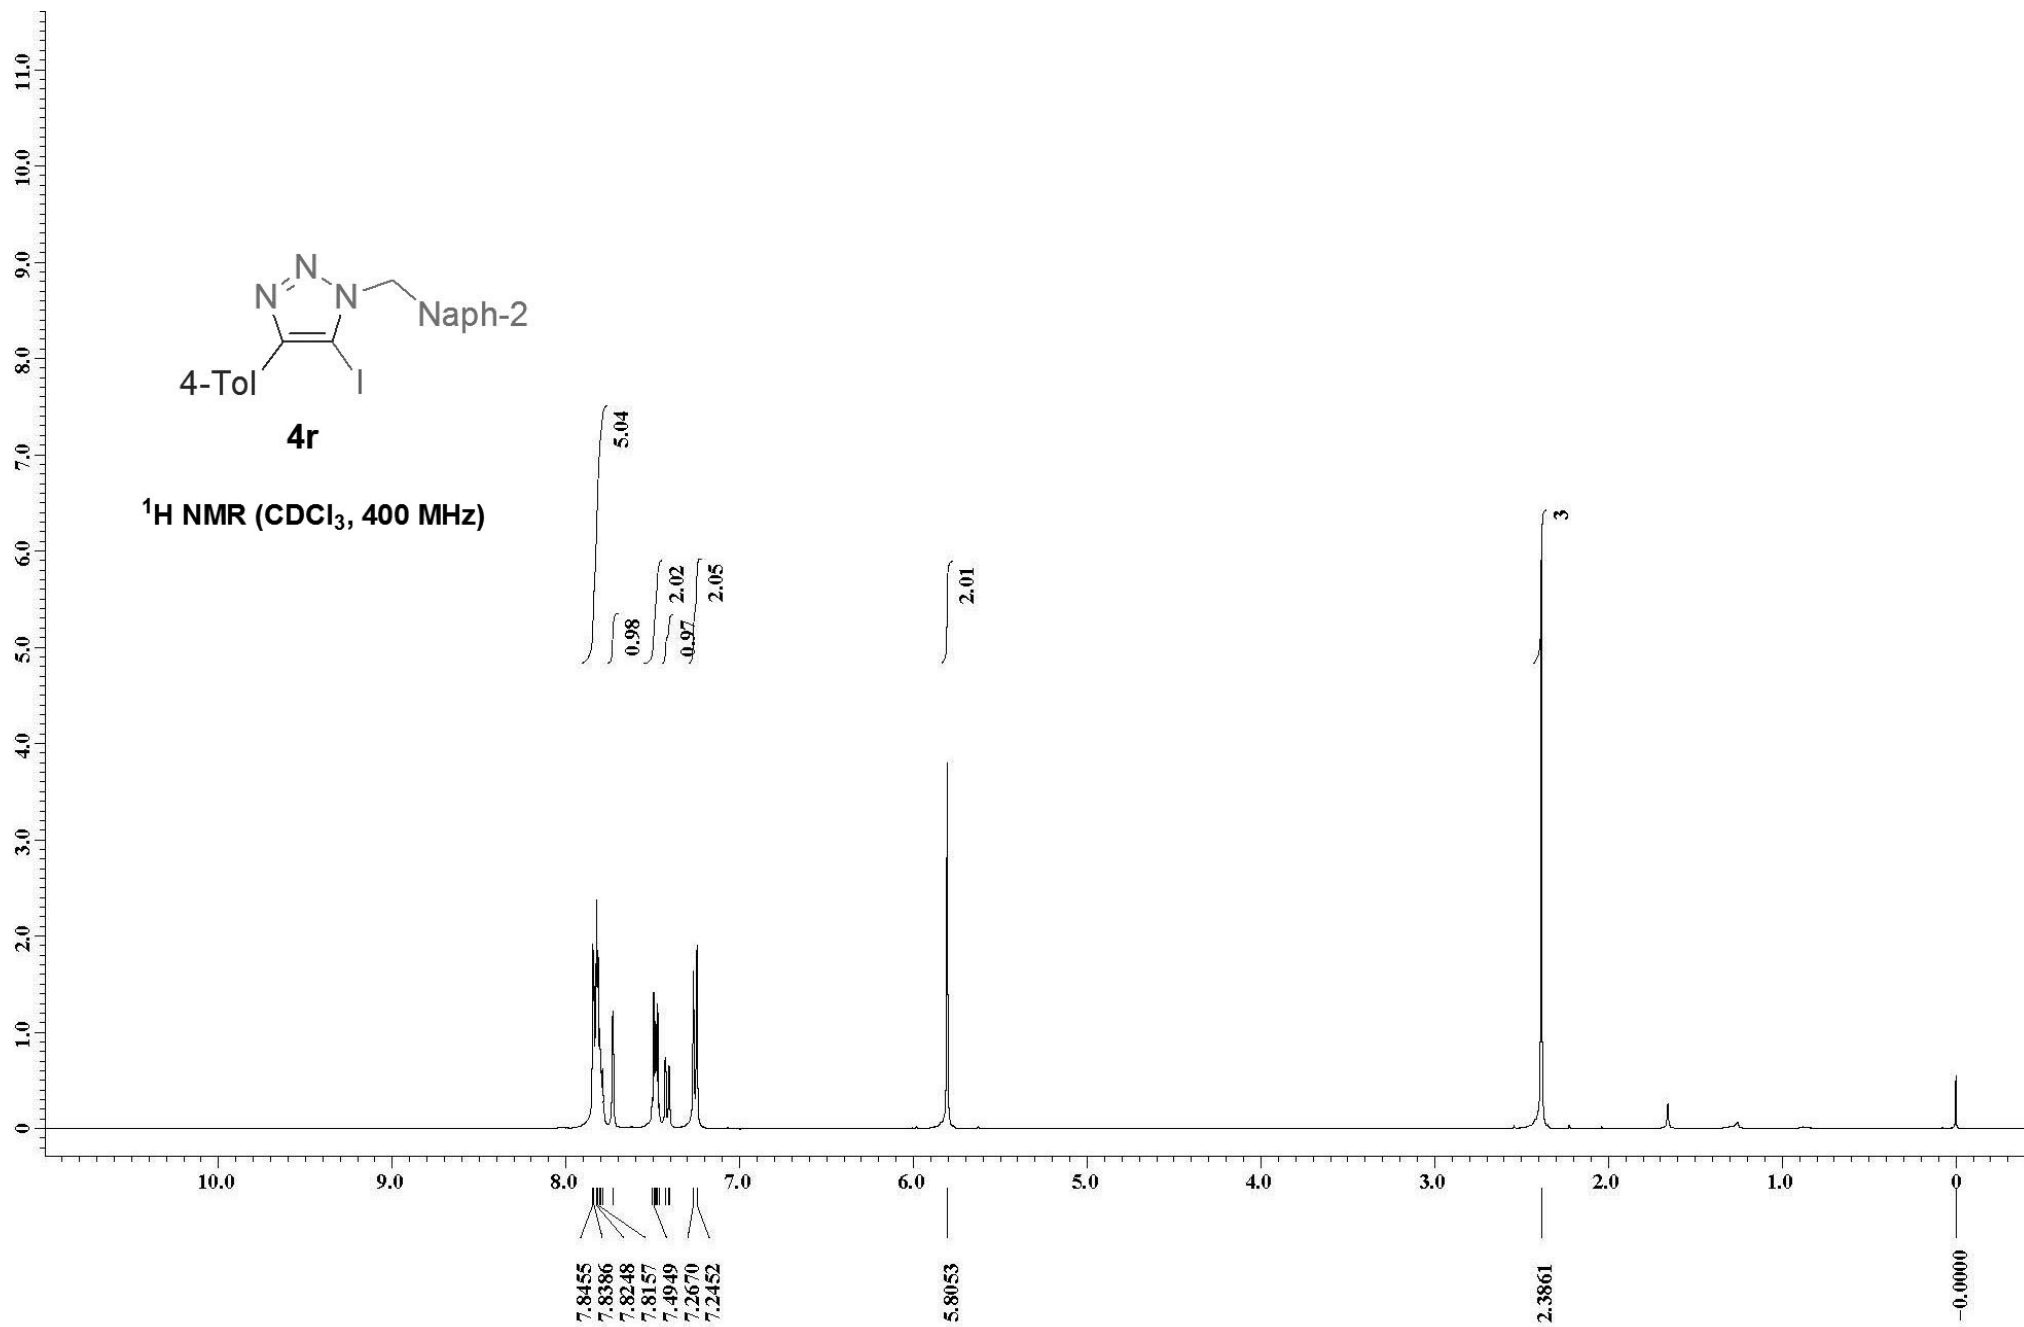

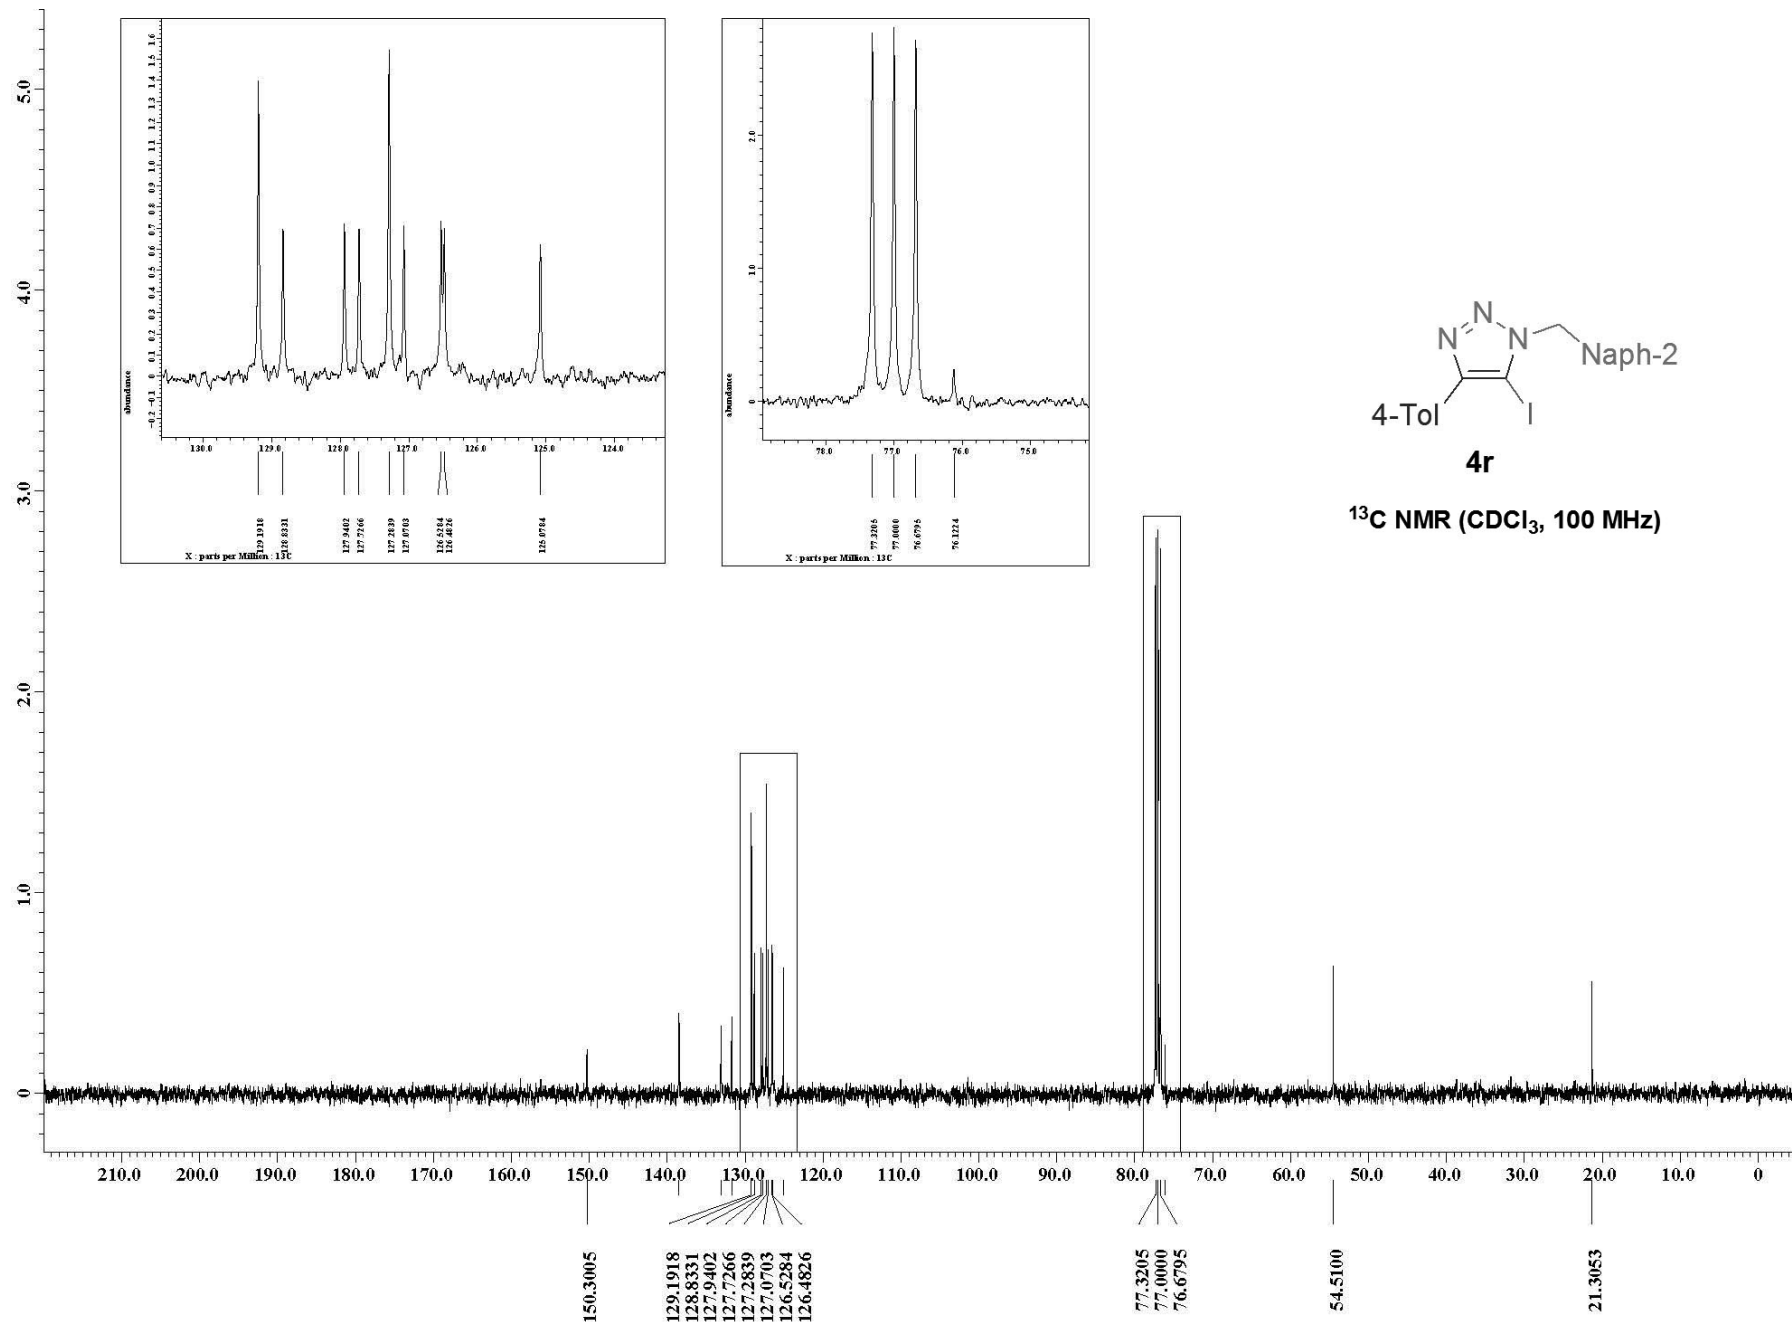

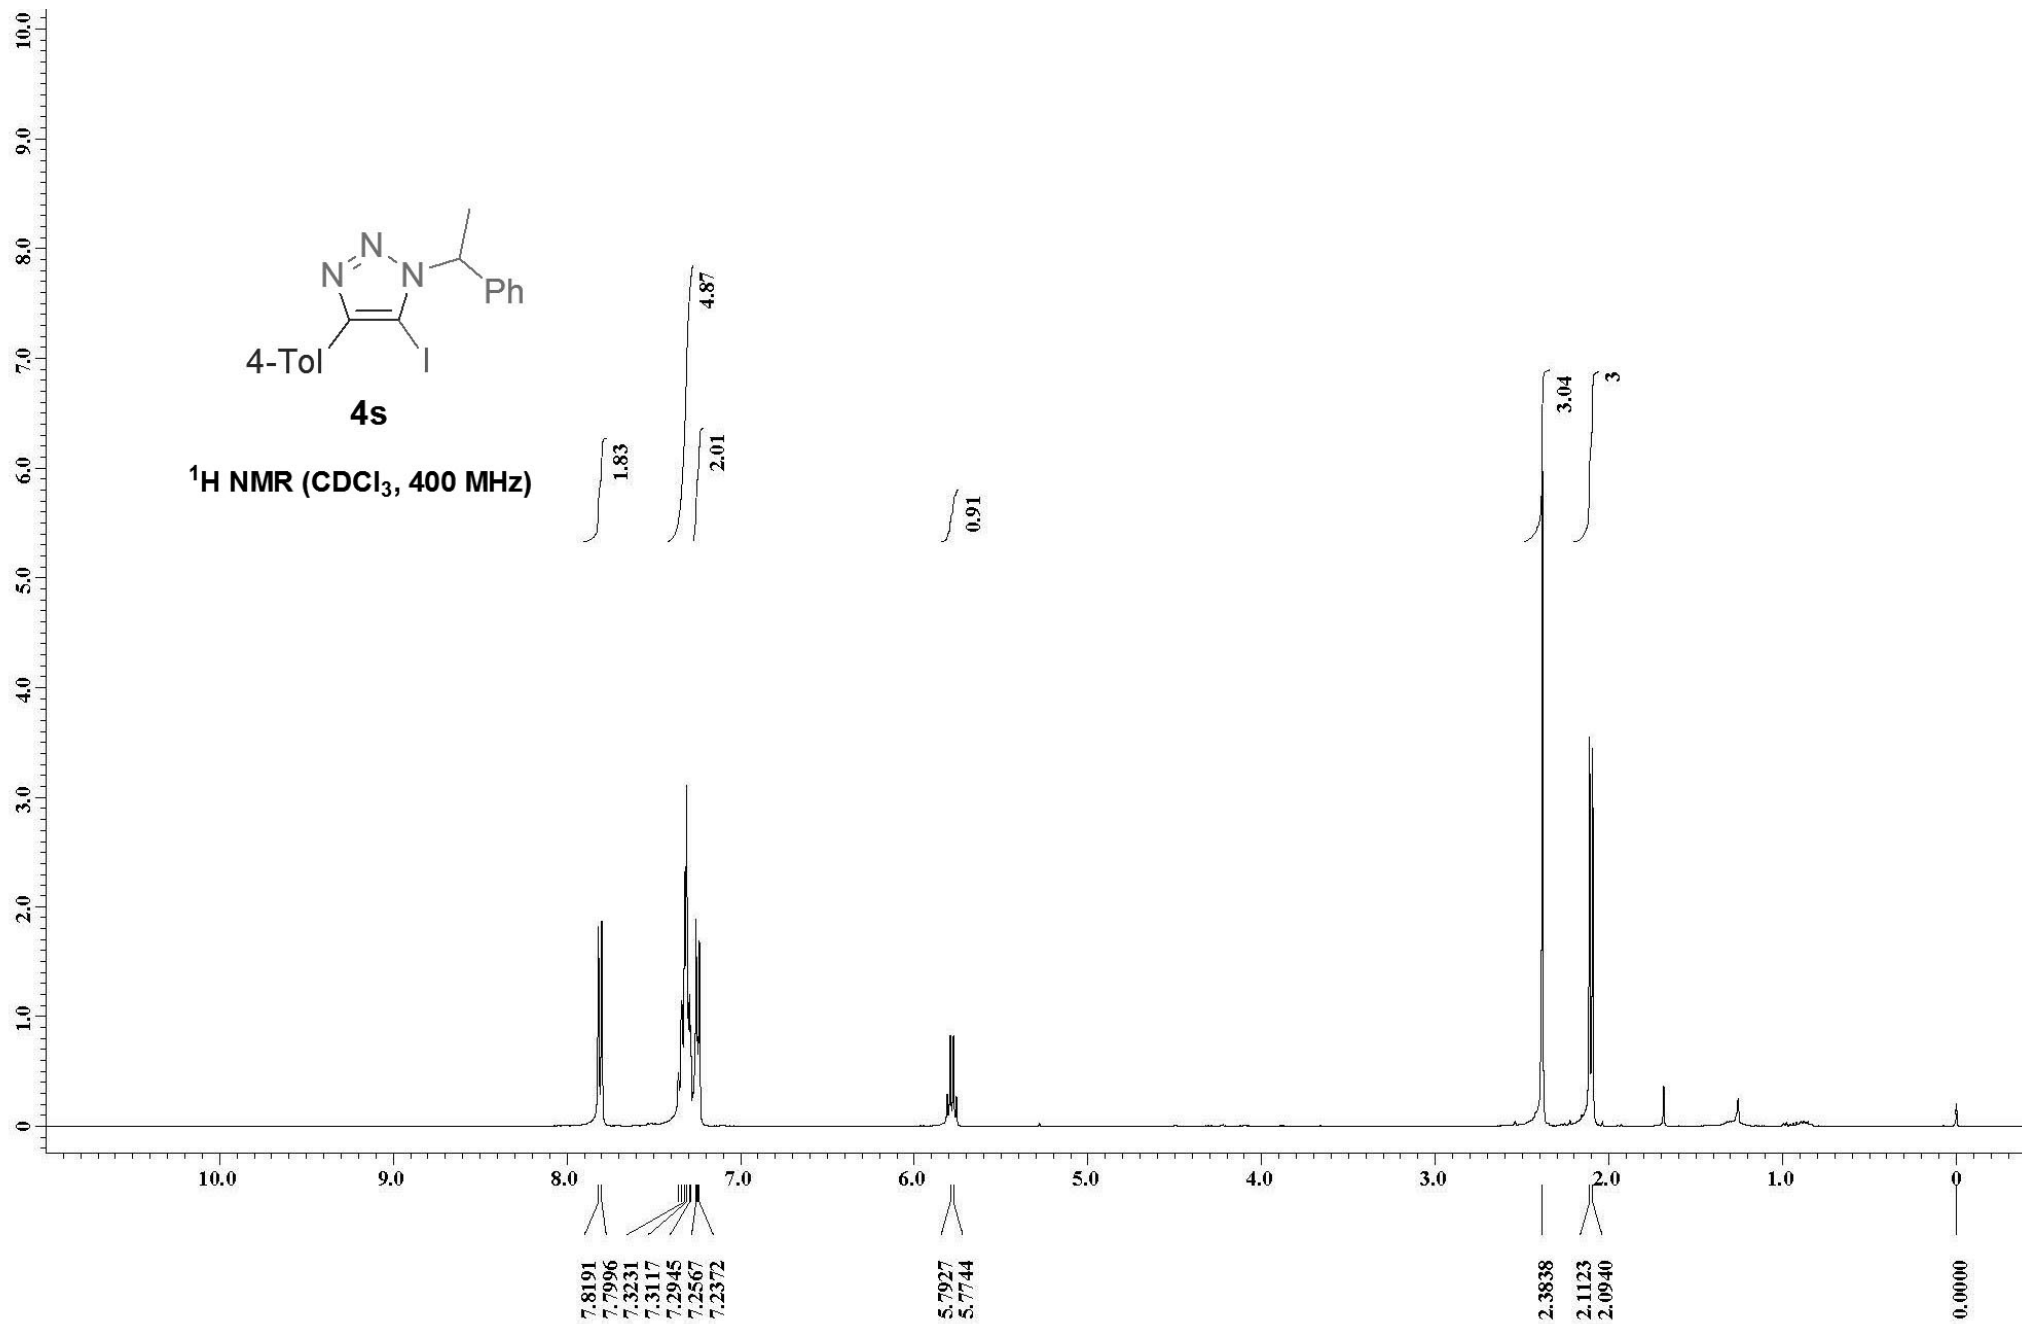

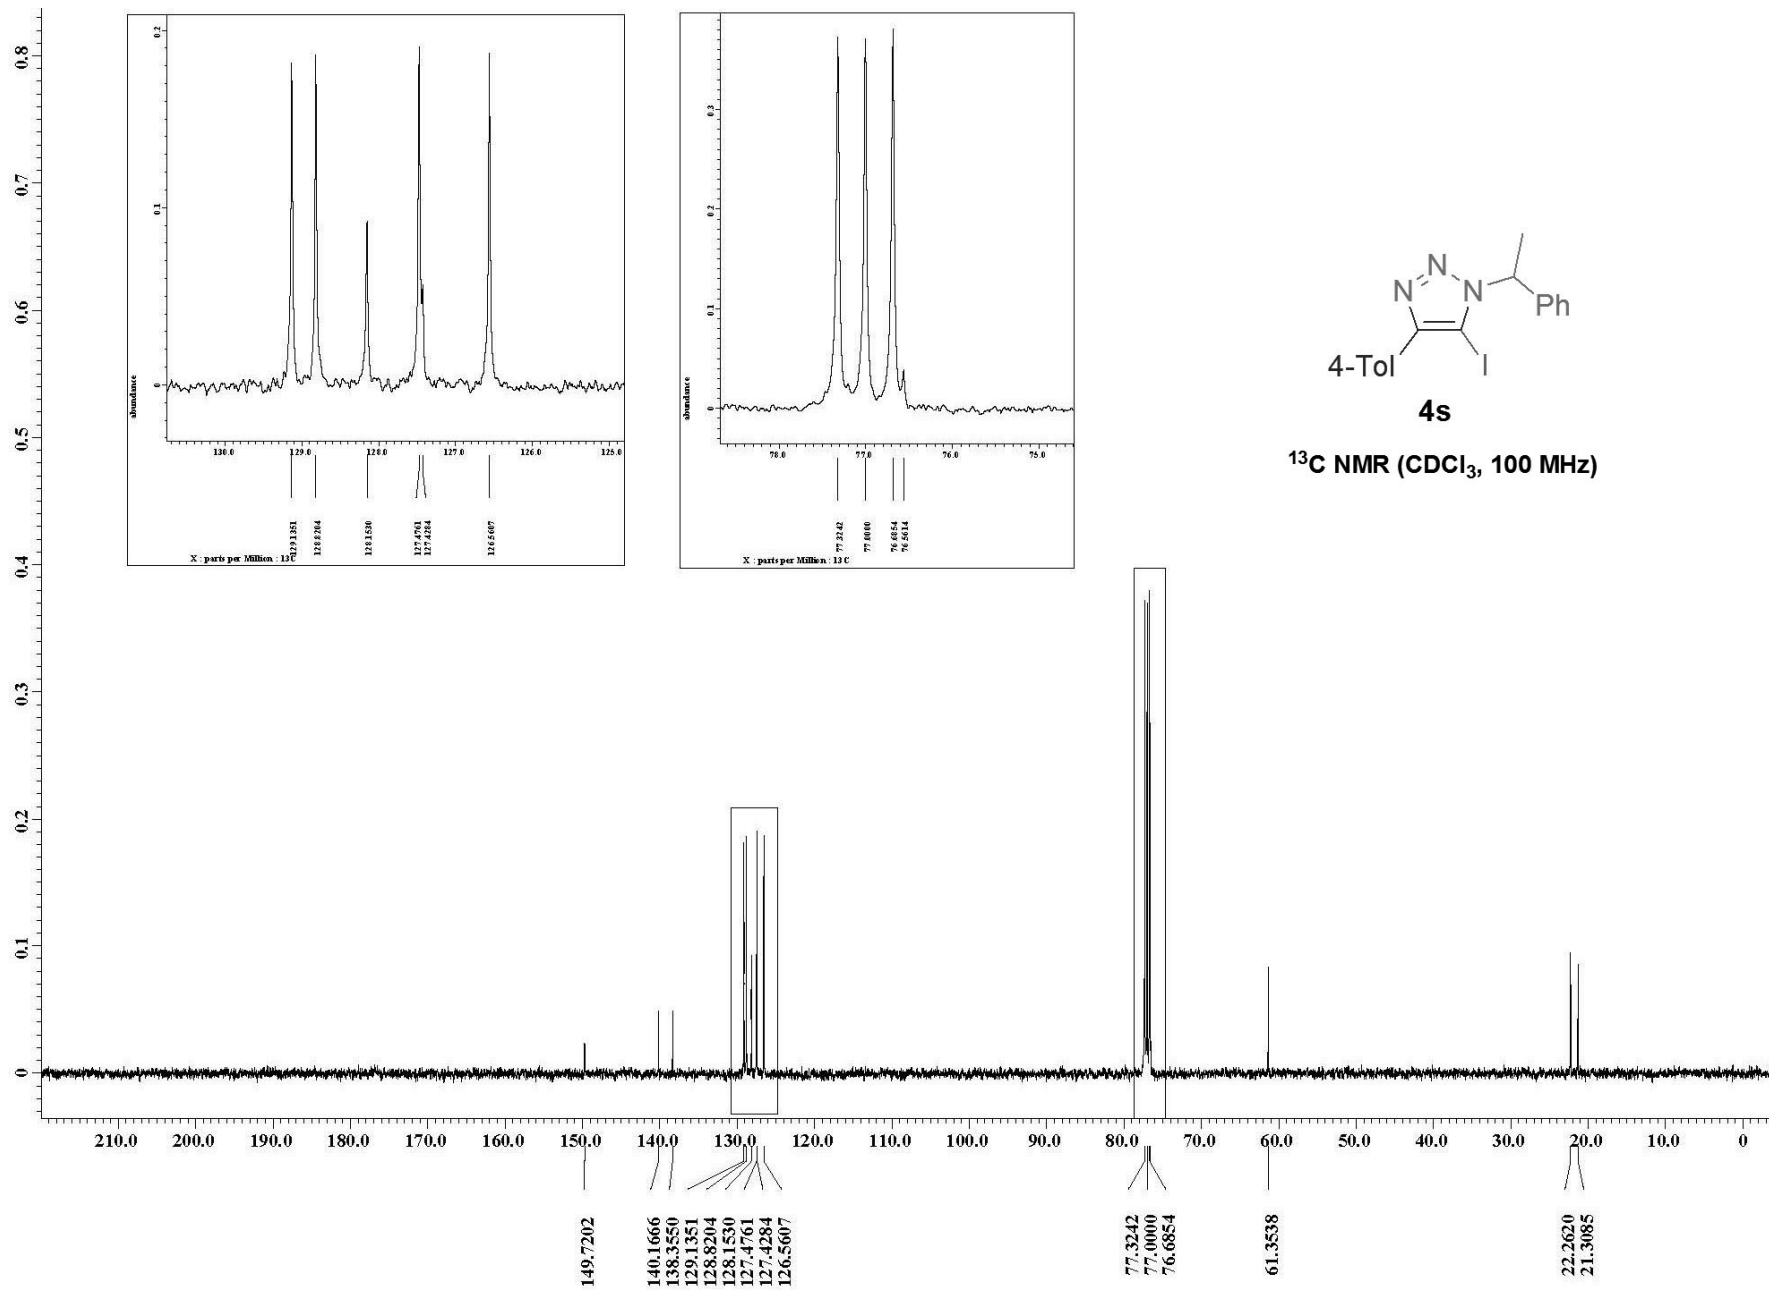



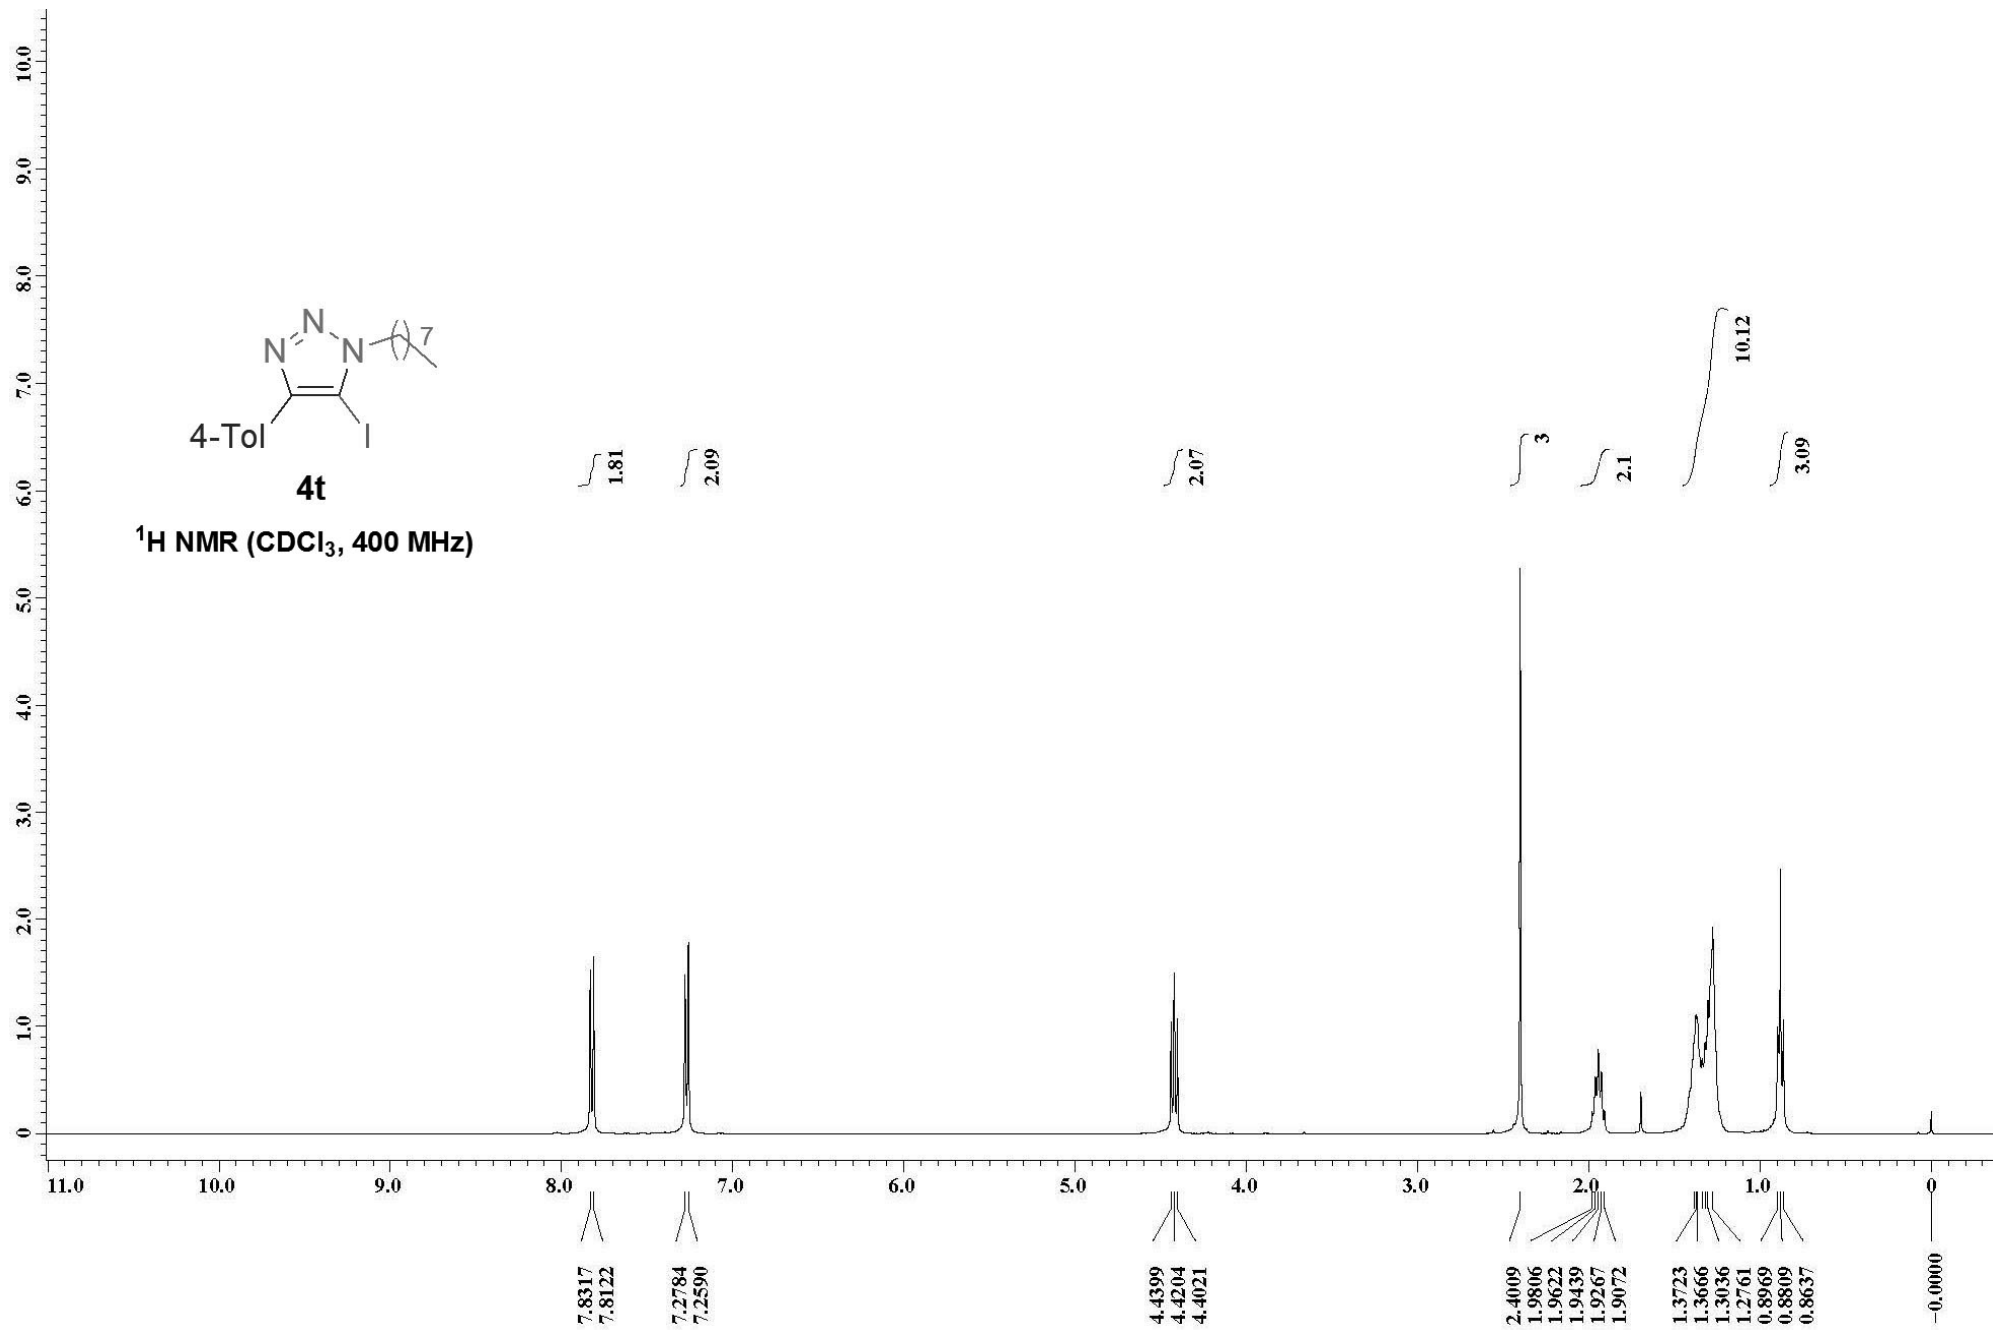

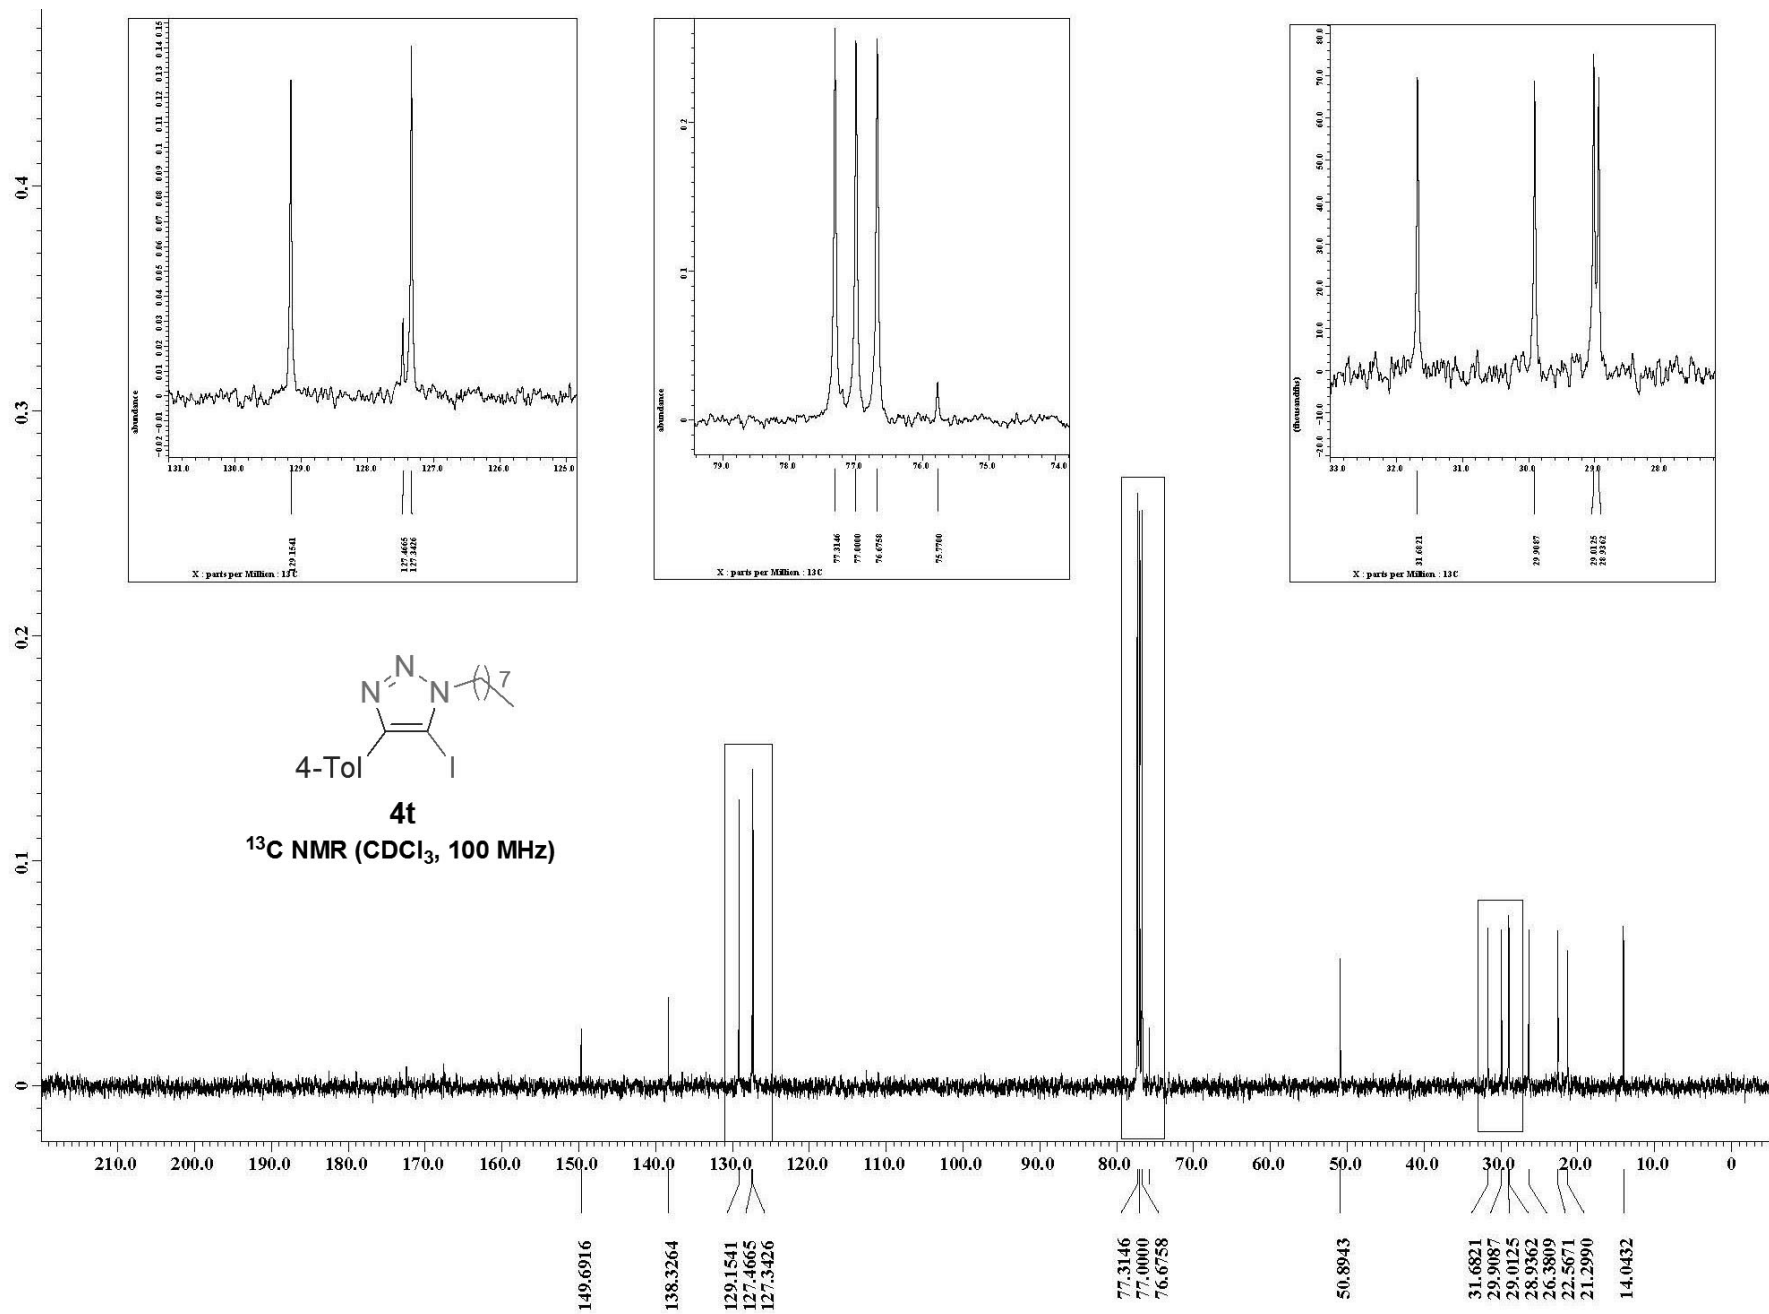

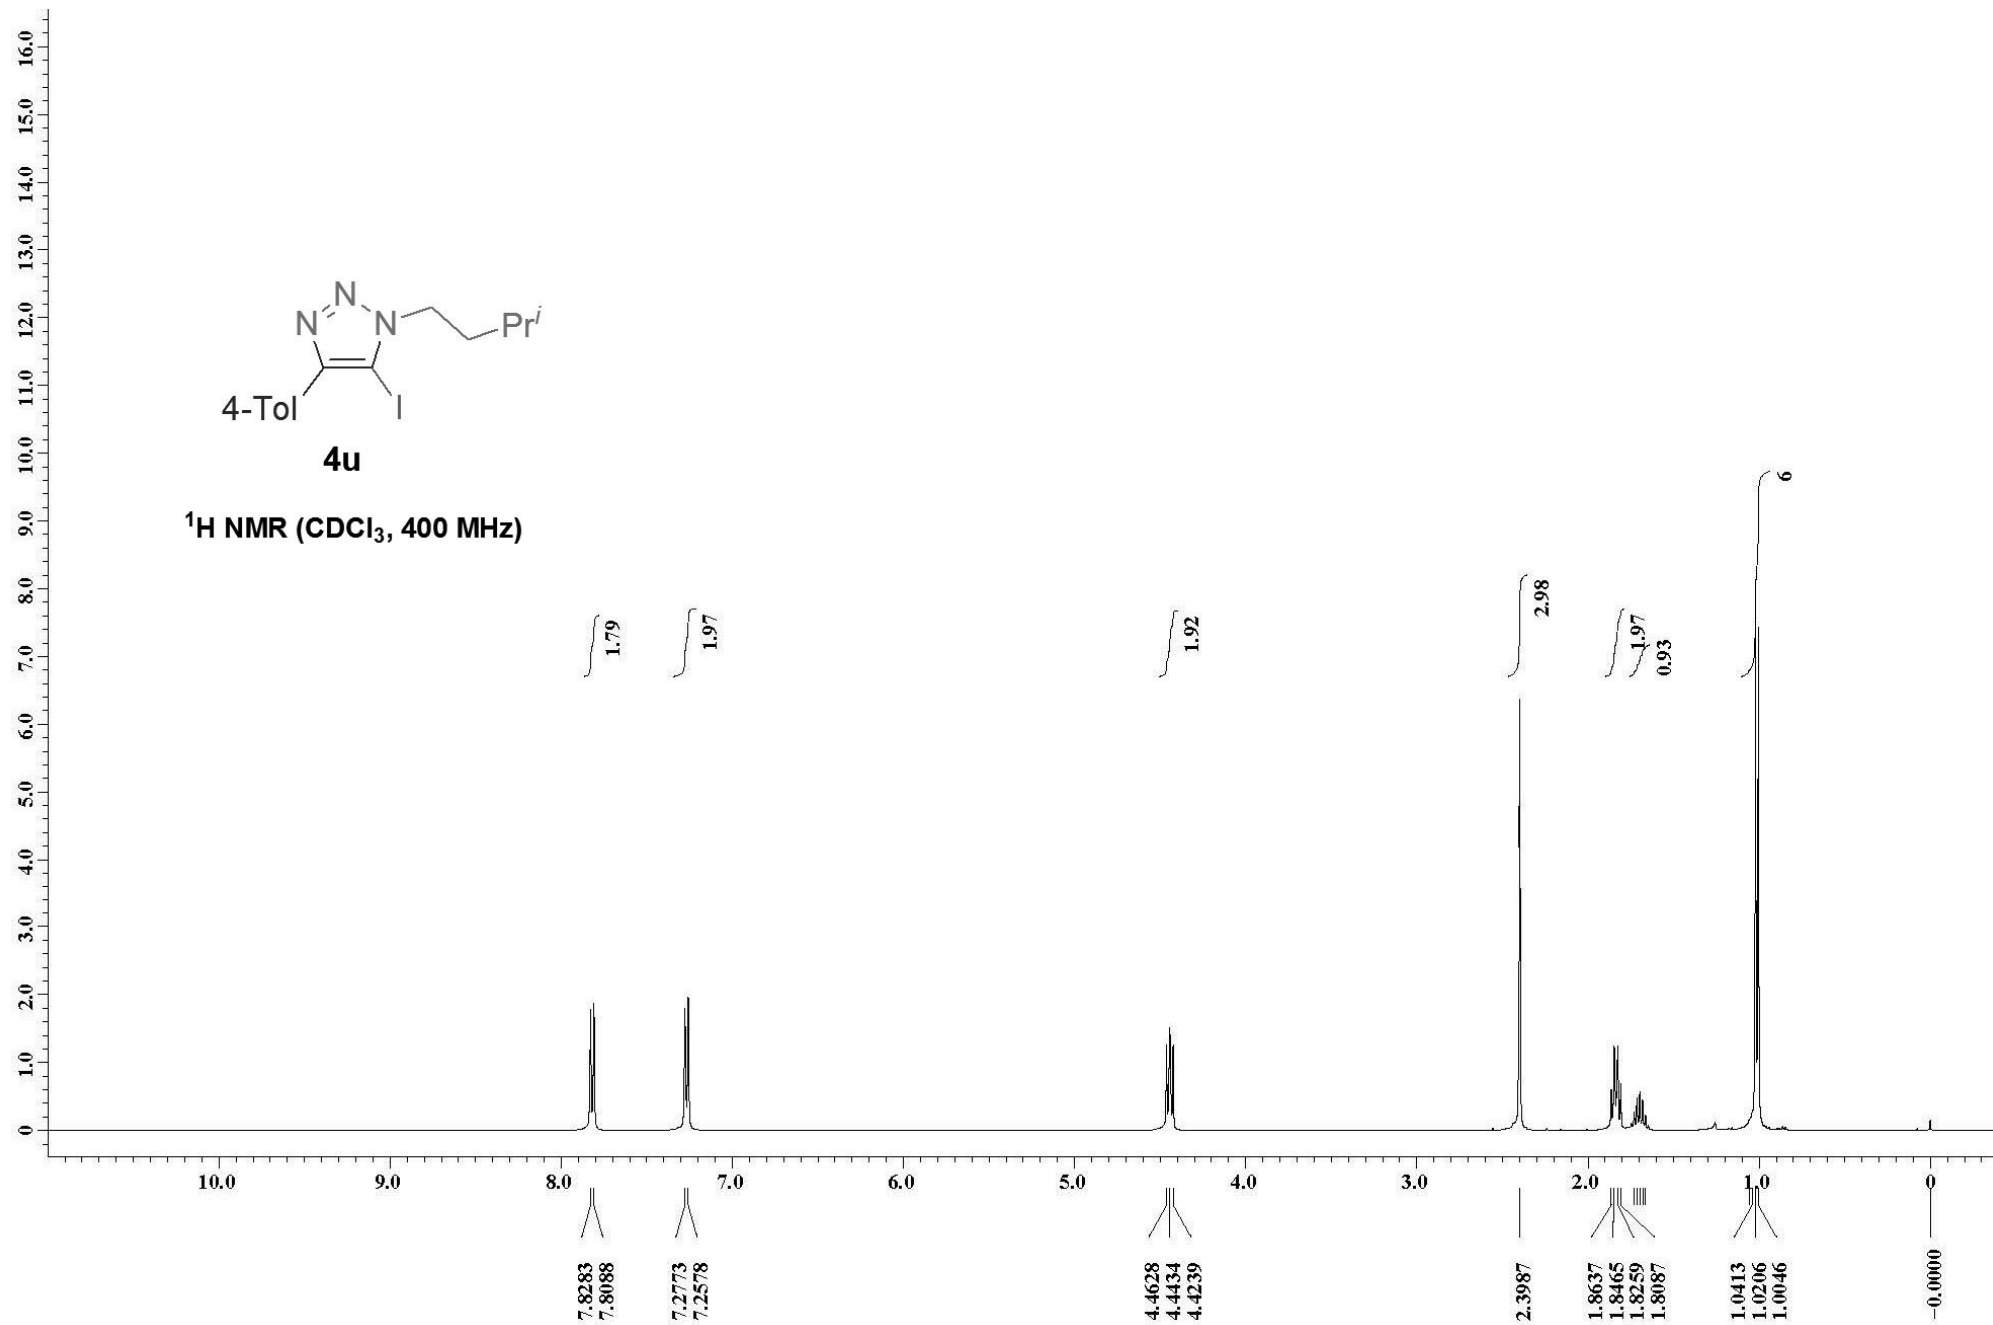

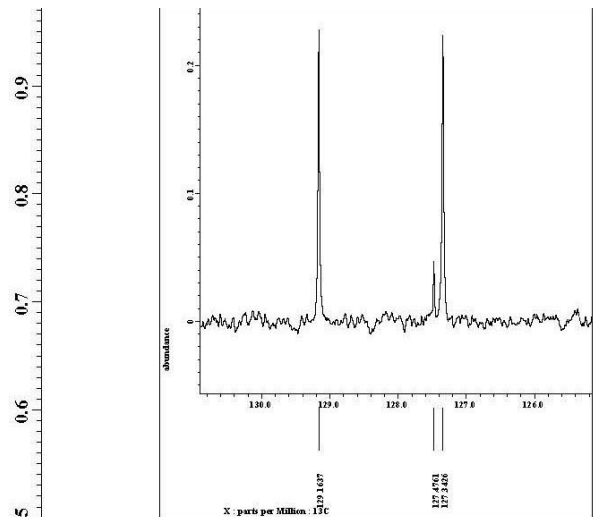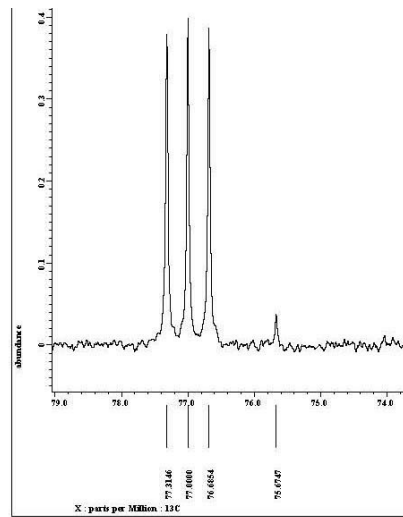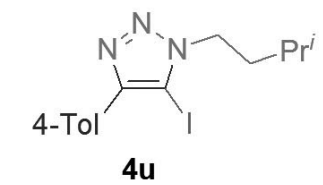

<sup>13</sup>C NMR (CDCl<sub>3</sub>, 100 MHz)

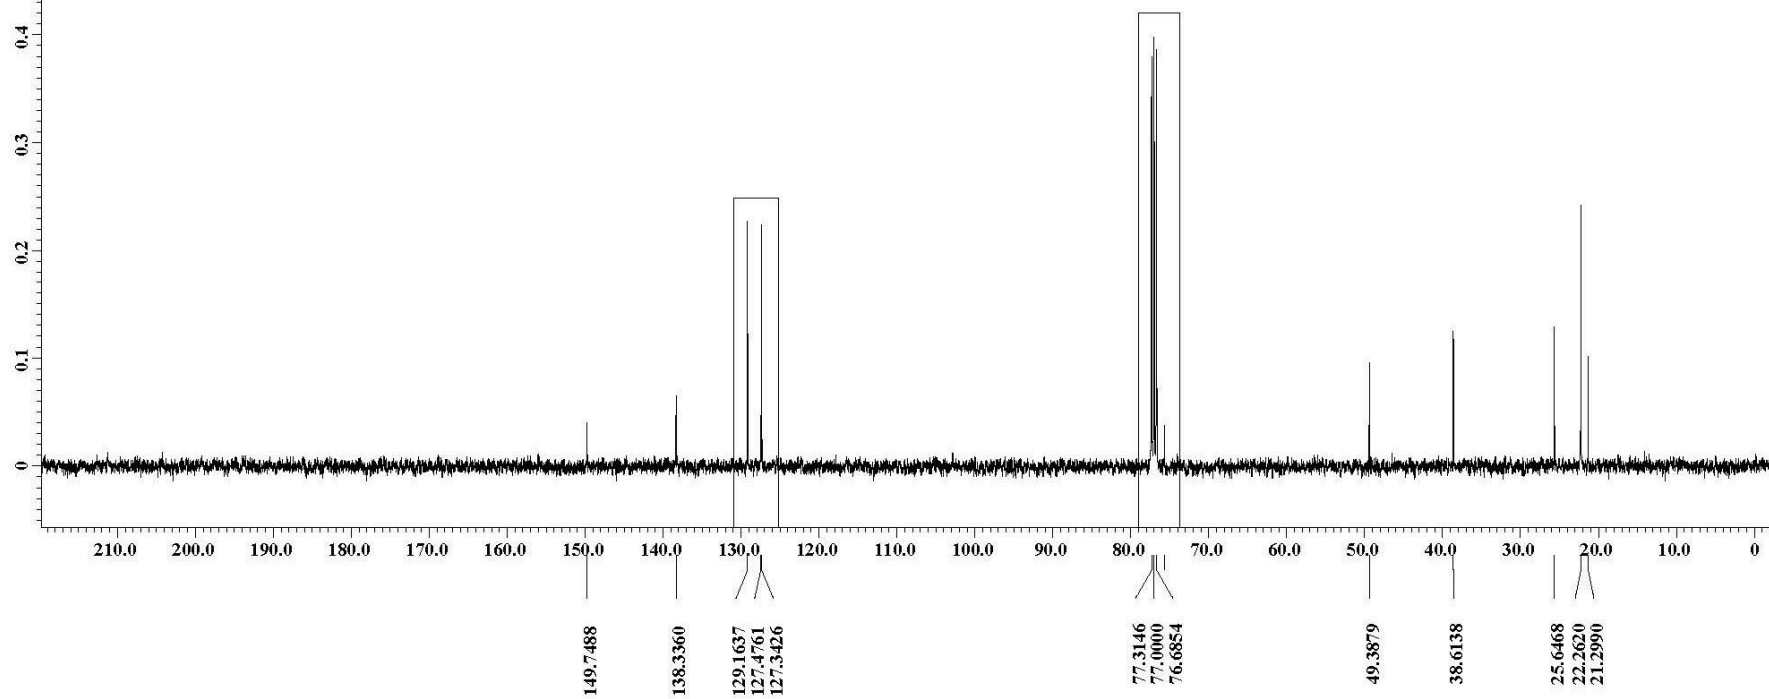

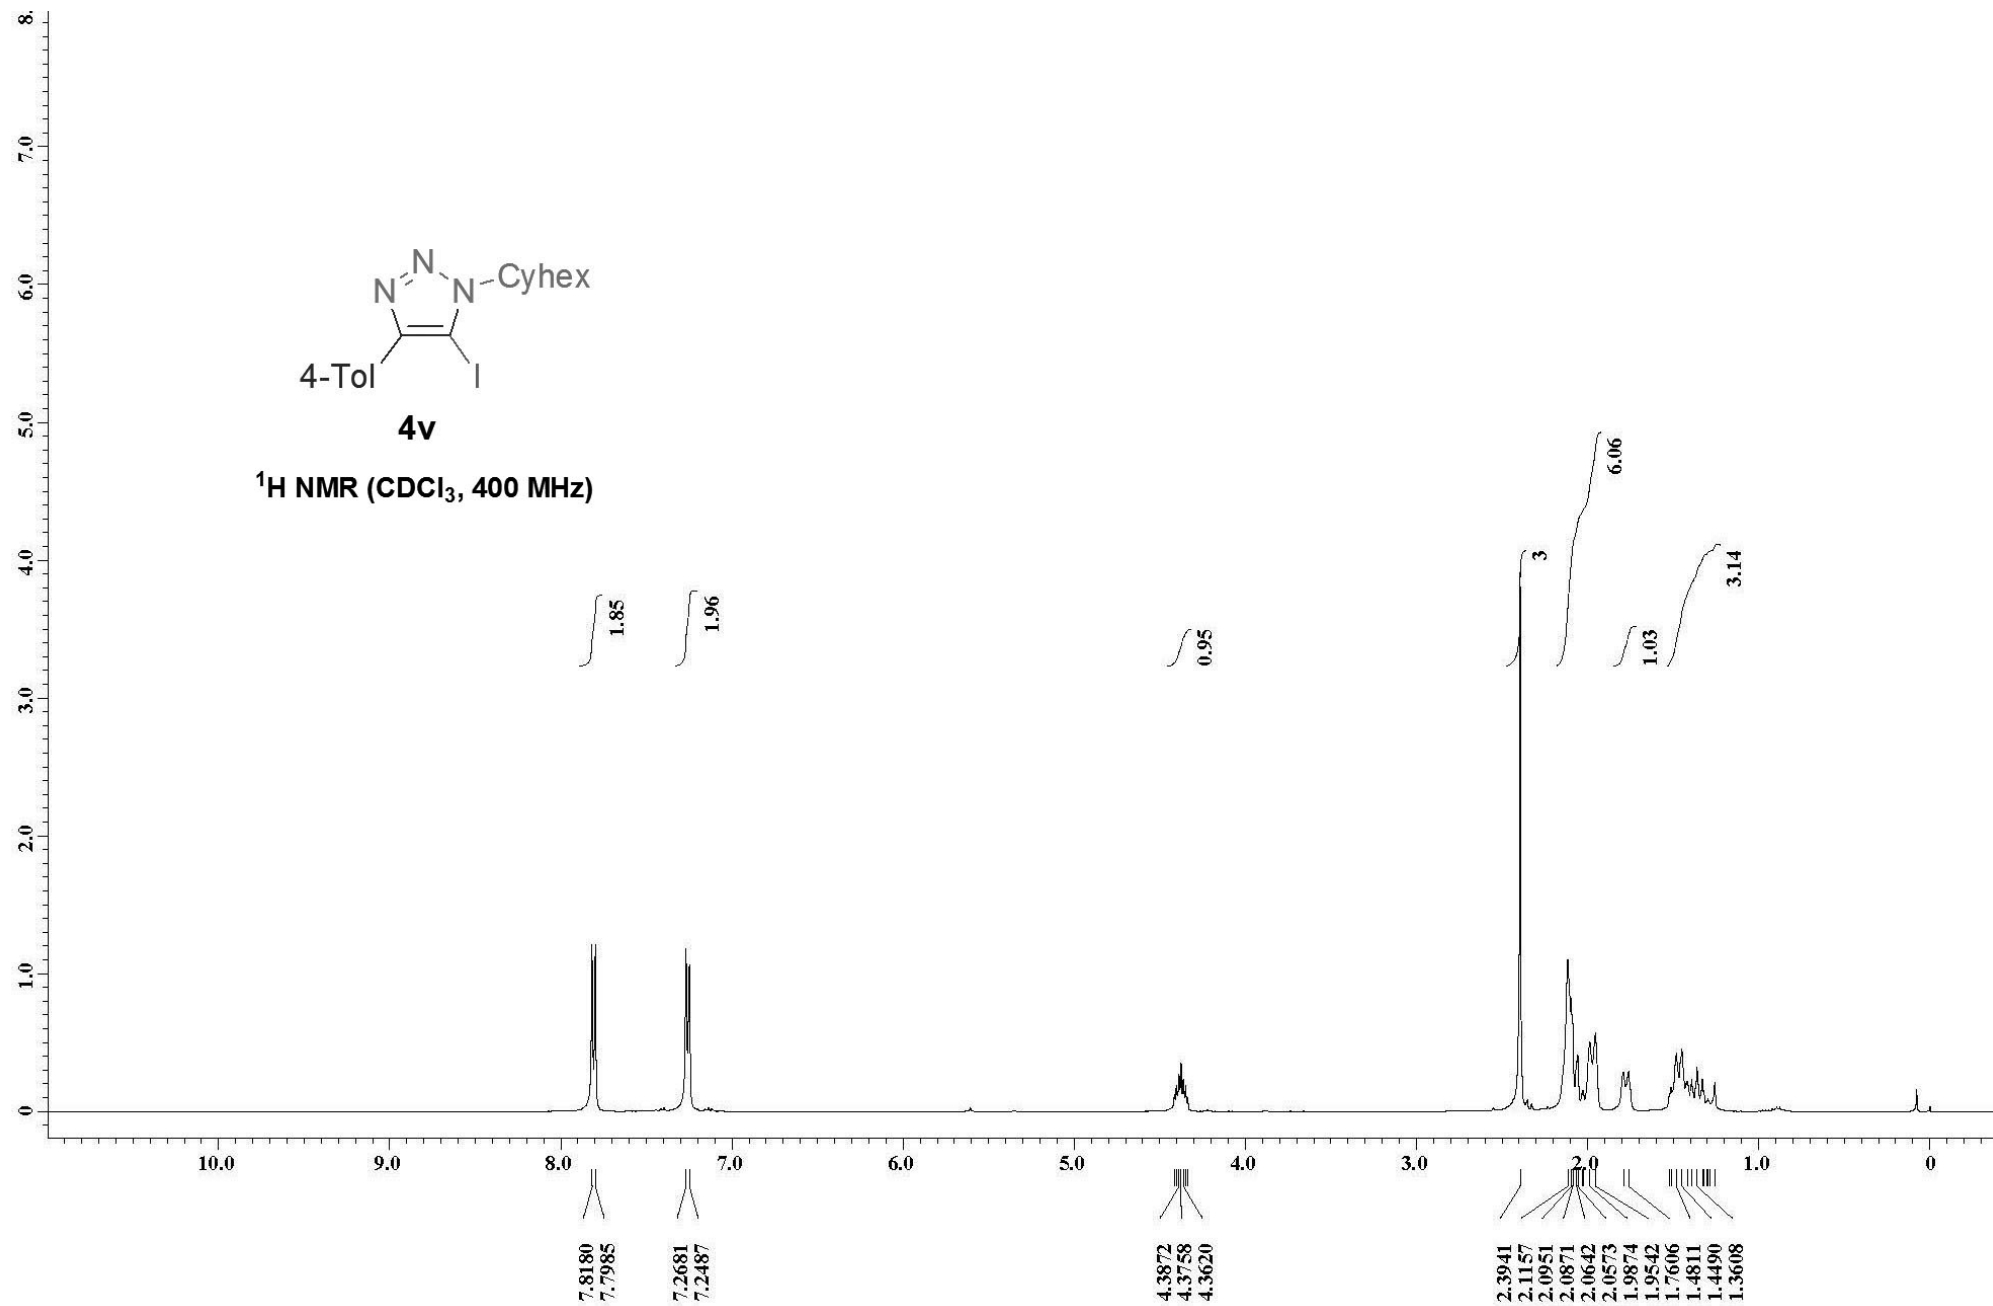

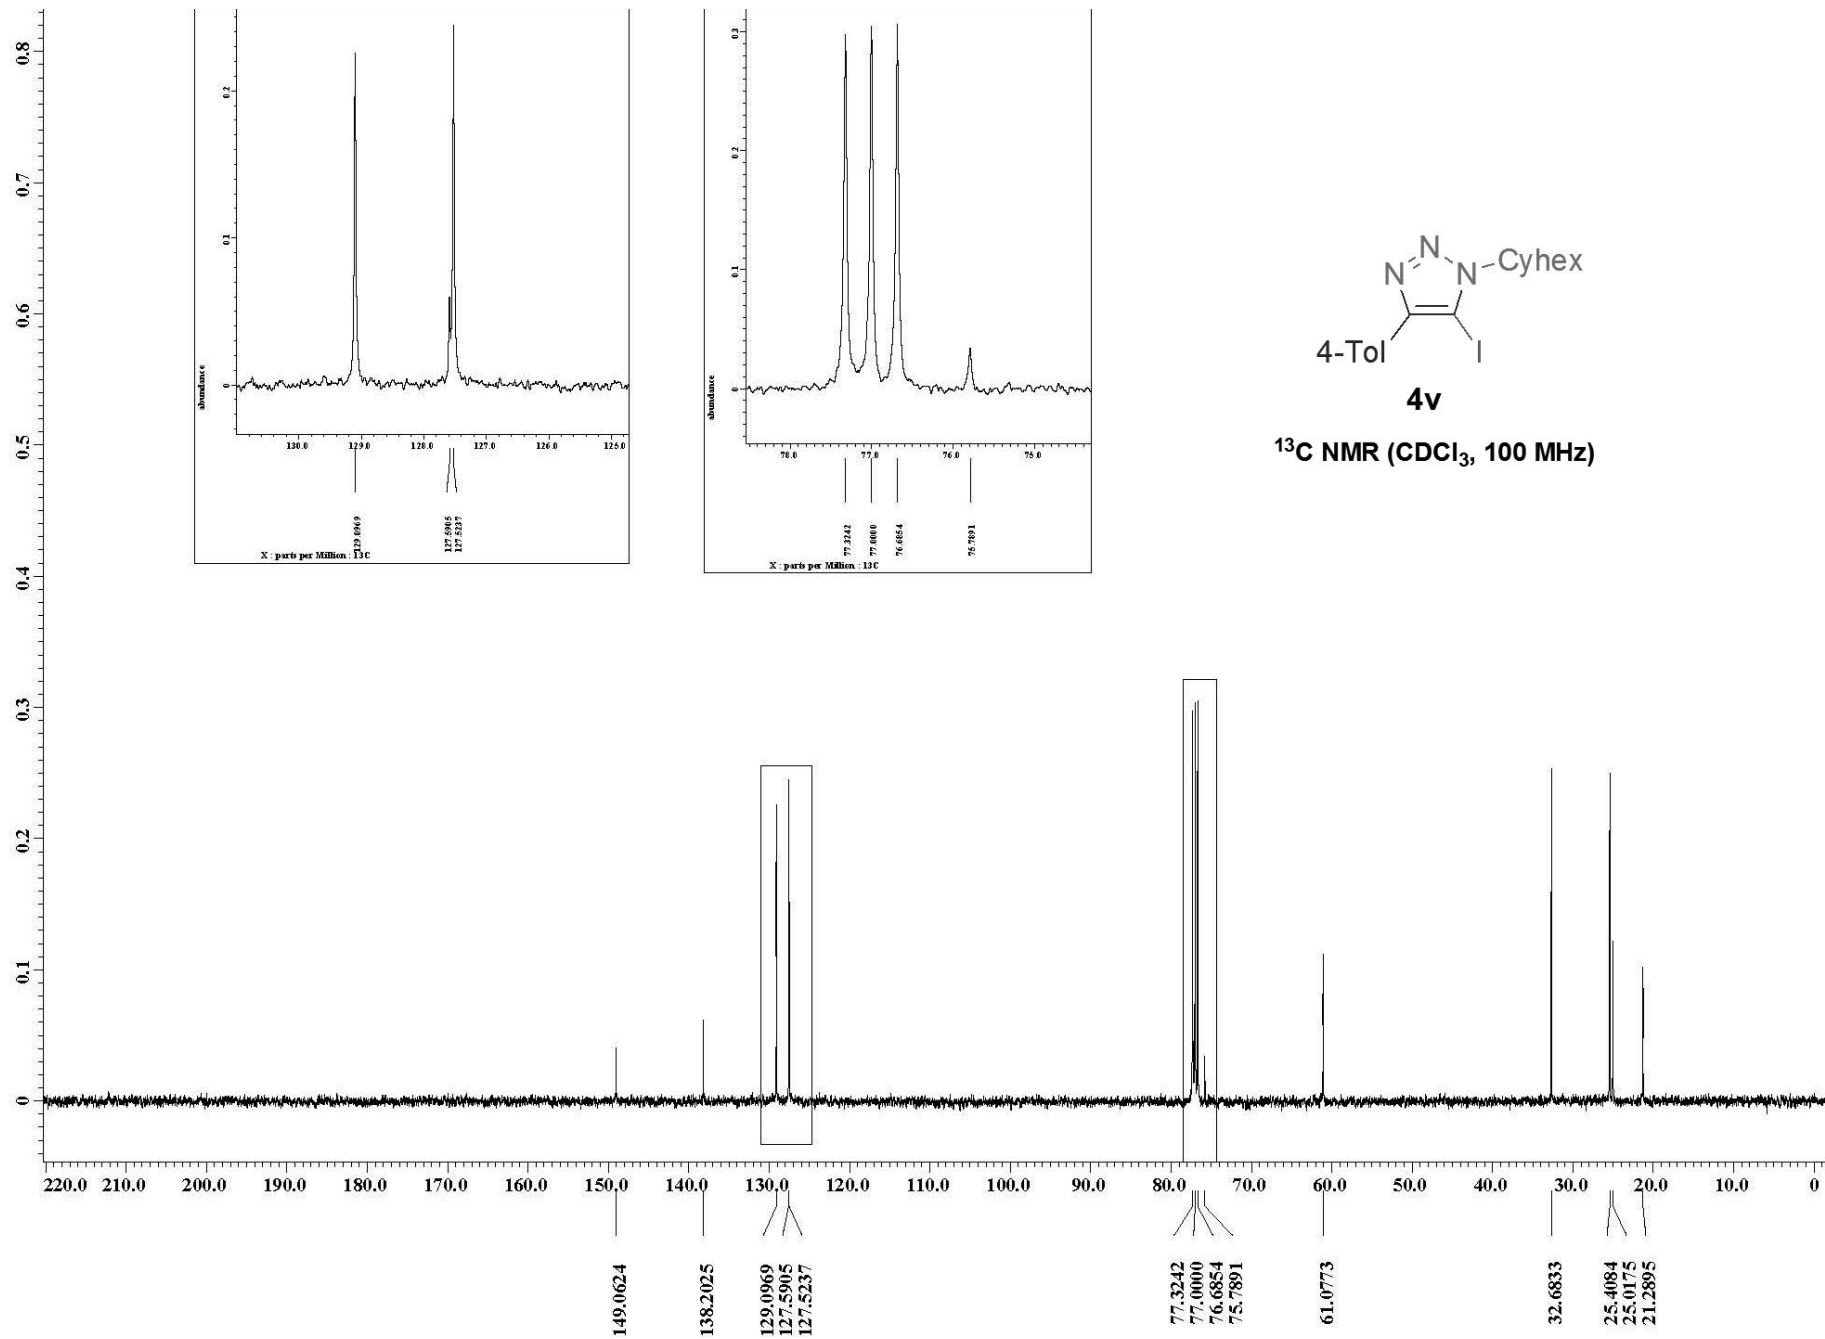

Supplement: c4ra15980b1.pdf [file c4ra15980b1.pdf]
